# Supplementary material for: Individual social contact data and population mobility data as early markers of SARS-CoV-2 transmission dynamics during the first wave in Germany—an analysis based on the COVIMOD study
Source: Springer Nature journal article supplement (doi:10.1186/s12916-021-02139-6), 2021-10-14

**Individual social contact data reflected SARS-CoV-2 transmission dynamics during the first wave in Germany better than population mobility data – an analysis based on the COVIMOD study.**

**Additional File 3: Additional results**

Damilola Victoria Tomori<sup>1</sup>, Nicole Rübsamen<sup>1</sup>, Tom Berger<sup>1</sup>, Stefan Scholz<sup>2</sup>, Jasmin Walde<sup>1</sup>, Ian Wittenberg<sup>3</sup>, Berit Lange<sup>4,5</sup>, Alexander Kuhlmann<sup>6,7</sup>, Johannes Horn<sup>3</sup>, Rafael Mikolajczyk<sup>3</sup>, Veronika K Jaeger<sup>1\*</sup>, André Karch<sup>1\*</sup>

<sup>1</sup>Institute of Epidemiology and Social Medicine, University of Münster, Münster, Germany

<sup>2</sup>Immunization Unit, Robert Koch-Institute, Berlin, Germany

<sup>3</sup>Institute for Medical Epidemiology, Biostatistics and Informatics, University of Halle, Halle, Germany

<sup>4</sup>Department of Epidemiology, Helmholtz Centre for Infection Research, Braunschweig, Germany

<sup>5</sup>German Center for Infection Research, Hannover-Braunschweig site, Germany

<sup>6</sup>Center for Health Economics Research Hannover (CHERH), Leibniz Universität Hannover, Hanover, Germany

<sup>7</sup>Biomedical Research in End-Stage and Obstructive Lung Disease Hannover (BREATH), German Center for Lung Research (DZL), Hanover, Germany

**Corresponding author**

Veronika K. Jaeger, PhD

Institute of Epidemiology and Social Medicine

University of Münster

Domagkstraße 3

48149 Münster

[veronika.jaeger@ukmuenster.de](mailto:veronika.jaeger@ukmuenster.de)

\*contributed equally as last authors

|                                                                                 |    |
|---------------------------------------------------------------------------------|----|
| Patient characteristics in COVIMOD compared to the German population .....      | 3  |
| 1.           WEIGHTED ANALYSIS INCLUDING GROUP CONTACTS.....                    | 4  |
| 1.1.        Participant characteristics .....                                   | 4  |
| 1.2.        Number of social contacts .....                                     | 5  |
| 1.3.        Comparison of the relative reduction in transmission dynamics.....  | 8  |
| 1.4.        Boxplots of the number of overall contacts.....                     | 12 |
| 1.5.        Social contact patterns .....                                       | 14 |
| 2.           UNWEIGHTED ANALYSIS INCLUDING GROUP CONTACTS.....                  | 16 |
| 2.1.        Participant characteristics .....                                   | 16 |
| 2.2.        Number of social contacts .....                                     | 18 |
| 2.3.        Comparison of the relative reduction in transmission dynamics.....  | 21 |
| 2.5.        Social contact patterns .....                                       | 29 |
| 2.6.        Relative reductions in transmission dynamics of SARS-CoV-2 .....    | 31 |
| 3.           WEIGHTED ANALYSIS WITHOUT GROUP CONTACTS .....                     | 33 |
| 3.2.        Number of social contacts .....                                     | 33 |
| 3.3.        Comparison of the relative reduction in transmission dynamics.....  | 35 |
| 3.4.        Boxplots of the number of overall contacts in various settings..... | 38 |
| 3.5.        Social contact patterns .....                                       | 43 |
| 3.6.        Relative reductions in transmission dynamics of SARS-CoV-2 .....    | 44 |
| 4.           UNWEIGHTED ANALYSIS WITHOUT GROUP CONTACTS .....                   | 46 |
| 4.2.        Number of social contacts .....                                     | 46 |
| 4.3.        Comparison of the relative reduction in transmission dynamics.....  | 49 |
| 4.4.        Boxplots of the number of overall in various settings.....          | 52 |
| 4.5.        Social contact patterns .....                                       | 57 |
| 4.6.        Relative reductions in transmission dynamics of SARS-CoV-2 .....    | 58 |

## Patient characteristics in COVIMOD compared to the German population

**Table 1.** Participant characteristics in the COVIMOD survey Waves 1 to 4 and in the POLYMOD survey, in comparison with the German population

Data of the German population are based on

[https://www.zensus2011.de/DE/Zensus2011/zensus2011\\_node.html](https://www.zensus2011.de/DE/Zensus2011/zensus2011_node.html)

|                            | German population | POLYMOD | COVIMOD |        |        |        |
|----------------------------|-------------------|---------|---------|--------|--------|--------|
|                            |                   |         | Wave 1  | Wave 2 | Wave 3 | Wave 4 |
| <b>Age category</b>        |                   |         |         |        |        |        |
| 0 – 9                      | 8.6%              | 14.0%   | 6.0%    | 5.7%   | 4.7%   | 6.3%   |
| 10 – 19                    | 9.9%              | 17.8%   | 10.8%   | 9.6%   | 8.4%   | 10.3%  |
| 20 – 29                    | 12.1%             | 14.8%   | 9.6%    | 7.9%   | 6.2%   | 11.0%  |
| 30 – 39                    | 11.8%             | 9.7%    | 11.8%   | 12.0%  | 9.3%   | 10.4%  |
| 40 – 49                    | 16.6%             | 14.0%   | 8.2%    | 9.1%   | 8.8%   | 8.9%   |
| 50 – 59                    | 14.5%             | 12.8%   | 19.7%   | 20.2%  | 22.2%  | 18.6%  |
| 60 - 69                    | 11.1%             | 12.2%   | 25.3%   | 26.7%  | 29.6%  | 25.2%  |
| 70 - 79                    | 10.1%             | 3.6%    | 7.9%    | 7.9%   | 10.0%  | 8.8%   |
| 80 +                       | 5.3%              | 1.0%    | 0.7%    | 0.8%   | 0.7%   | 0.5%   |
| <b>Sex of participants</b> |                   |         |         |        |        |        |
| Female                     | 48.8%             | 55.4%   | 48.1%   | 47.1%  | 49.6%  | 47.8%  |
| Male                       | 51.2%             | 44.6%   | 51.9%   | 52.9%  | 50.4%  | 52.2%  |
| <b>Household size</b>      |                   |         |         |        |        |        |
| 1                          | 17.1%             | 18.6%   | 14.9%   | 18.9%  | 24.8%  | 25.8%  |
| 2                          | 31.1%             | 30.6%   | 26.4%   | 25.9%  | 25.0%  | 23.2%  |
| 3                          | 20.1%             | 25.3%   | 32.9%   | 33.0%  | 31.7%  | 28.8%  |
| 4                          | 19.4%             | 18.2%   | 12.8%   | 11.1%  | 9.9%   | 11.3%  |
| 5                          | 7.6%              | 4.8%    | 9.6%    | 8.3%   | 6.6%   | 8.1%   |
| 6 or more                  | 4.7%              | 2.4%    | 3.4%    | 2.9%   | 2.0%   | 2.9%   |

1. **WEIGHTED ANALYSIS INCLUDING GROUP CONTACTS**

COVIMOD Wave 3 - 4 as well as POLYMOD include group contacts

**1.1. Participant characteristics**

1.1.a. Table 1.1a Participant characteristics in the COVIMOD survey Waves 1 to 4 and in the POLYMOD survey for the weighted analysis including group contacts

|                            | POLYMOD | COVIMOD |         |         |         |
|----------------------------|---------|---------|---------|---------|---------|
|                            |         | Wave 1  | Wave 2  | Wave 3  | Wave 4  |
|                            | percent | percent | percent | percent | percent |
| <b>Age category</b>        |         |         |         |         |         |
| 0 - 4                      | 1.9     | 4.7     | 3.4     | 2.4     | 4.1     |
| 5 - 9                      | 4.5     | 3.7     | 5.1     | 5.9     | 5.5     |
| 10 - 14                    | 2.8     | 3.2     | 3.9     | 4.1     | 5.0     |
| 15 - 19                    | 2.5     | 7.6     | 6.8     | 5.6     | 5.6     |
| 20 - 24                    | 9.4     | 7.8     | 6.6     | 3.6     | 5.5     |
| 25 - 34                    | 6.8     | 13.5    | 13.1    | 18.4    | 16.7    |
| 35 - 44                    | 11.8    | 17.0    | 14.8    | 13.3    | 15.0    |
| 45 - 54                    | 21.5    | 18.0    | 19.2    | 12.7    | 16.9    |
| 55 - 64                    | 6.2     | 7.3     | 7.5     | 10.4    | 8.3     |
| 65 - 69                    | 6.2     | 5.2     | 6.0     | 5.6     | 4.2     |
| 70 - 74                    | 8.8     | 6.8     | 6.2     | 10.9    | 7.2     |
| 75 - 79                    | 1.8     | 2.8     | 3.9     | 2.9     | 3.3     |
| 80 +                       | 15.8    | 2.4     | 3.5     | 4.2     | 2.6     |
| <b>Sex of participants</b> |         |         |         |         |         |
| Female                     | 41.4    | 50.1    | 50.7    | 54.0    | 51.1    |
| Male                       | 58.6    | 49.9    | 49.3    | 46.0    | 48.9    |
| <b>Household size</b>      |         |         |         |         |         |
| 1                          | 14.1    | 15.8    | 17.1    | 20.7    | 17.7    |
| 2                          | 22.5    | 29.0    | 26.2    | 29.9    | 26.4    |
| 3                          | 11.9    | 23.3    | 23.9    | 18.9    | 22.5    |
| 4 or more                  | 51.5    | 31.9    | 32.8    | 30.4    | 33.4    |
| <b>Weekdays</b>            |         |         |         |         |         |
| Monday                     | 14.3    | 3.8     | 3.7     | 9.5     | 31.9    |
| Tuesday                    | 11.2    | 4.5     | 8.0     | 8.3     | 12.5    |
| Wednesday                  | 10.2    | 3.2     | 13.8    | 4.9     | 8.8     |
| Thursday                   | 26.7    | 50.0    | 38.0    | 31.0    | 11.1    |
| Friday                     | 13.4    | 5.6     | 6.9     | 9.5     | 7.1     |
| Saturday                   | 11.9    | 8.1     | 10.9    | 20.7    | 7.6     |
| Sunday                     | 12.3    | 24.8    | 18.6    | 16.0    | 21.1    |

## 1.2. Number of social contacts

1.2.a. Table 1.2a Number of recorded overall contacts per participant per day stratified by age, gender, household size, and day of the week in the COVIMOD survey Waves 1 to 4 and the POLYMOD survey for the weighted analysis including group contacts.

|                            | POLYMOD            |              | COVIMOD          |              |                  |              |                   |              |                   |              |
|----------------------------|--------------------|--------------|------------------|--------------|------------------|--------------|-------------------|--------------|-------------------|--------------|
|                            |                    |              | Wave 1           |              | Wave 2           |              | Wave 3            |              | Wave 4            |              |
|                            | Mean (SD)          | Min, Max     | Mean (SD)        | Min, Max     | Mean (SD)        | Min, Max     | Mean (SD)         | Min, Max     | Mean (SD)         | Min, Max     |
|                            | <b>18.9 (24.6)</b> | <b>1,512</b> | <b>2.0 (1.9)</b> | <b>0, 16</b> | <b>3.3 (4.7)</b> | <b>0,102</b> | <b>6.2 (18.4)</b> | <b>0,500</b> | <b>6.9 (26.3)</b> | <b>0,674</b> |
| <b>Age category</b>        |                    |              |                  |              |                  |              |                   |              |                   |              |
| 0 - 4                      | 9.4 (5.5)          | 2,30         | 2.9 (1.6)        | 0,8          | 5.0 (2.6)        | 0,14         | 6.0 (6.5)         | 2,24         | 9.4 (14.0)        | 0,89         |
| 5 - 9                      | 8.4 (5.0)          | 2,43         | 3.5 (1.8)        | 0,8          | 3.9 (3.3)        | 0,17         | 5.4 (5.3)         | 0,27         | 4.9 (4.4)         | 0,31         |
| 10 - 14                    | 15.7 (15.6)        | 2,61         | 3.2 (1.6)        | 0,12         | 3.9 (2.2)        | 0,9          | 15.1 (51.4)       | 0,500        | 8.8 (12.7)        | 0,110        |
| 15 - 19                    | 30.9 (25.4)        | 1,215        | 3.2 (2.0)        | 0,8          | 4.4 (3.2)        | 0,20         | 3.7 (3.7)         | 0,27         | 6.8 (13.3)        | 0,113        |
| 20 - 24                    | 22.6 (23.7)        | 1,310        | 2.0 (2.2)        | 0,16         | 3.3 (2.7)        | 0,20         | 5.2 (8.6)         | 0,45         | 8.8 (20.4)        | 0,169        |
| 25 - 34                    | 40.5 (41.4)        | 2,512        | 1.7 (1.8)        | 0,13         | 3.0 (3.2)        | 0,18         | 6.0 (13.1)        | 0,100        | 7.2 (16.6)        | 0,150        |
| 35 - 44                    | 25.4 (16.6)        | 1,111        | 2.1 (2.0)        | 0,11         | 3.3 (2.8)        | 0,33         | 8.3 (22.7)        | 0,150        | 5.0 (29.7)        | 0,674        |
| 45 - 54                    | 29.3 (31.8)        | 1,260        | 1.8 (1.5)        | 0,9          | 3.4 (8.2)        | 0,102        | 11.3 (27.9)       | 0,131        | 9.5 (48.3)        | 0,532        |
| 55 - 64                    | 14.0 (20.8)        | 1,150        | 1.8 (1.5)        | 0,12         | 3.3 (4.0)        | 0,42         | 3.8 (9.9)         | 0,186        | 10.3 (24.8)       | 0,127        |
| 65 - 69                    | 10.0 (7.9)         | 1,58         | 1.6 (1.7)        | 0,11         | 3.4 (6.6)        | 0,93         | 4.1 (9.3)         | 0,101        | 4.8 (17.5)        | 0,216        |
| 70 - 74                    | 8.4 (8.7)          | 1,25         | 1.1 (1.4)        | 0,8          | 2.6 (3.1)        | 0,25         | 3.0 (2.1)         | 0,13         | 3.1 (4.5)         | 0,37         |
| 75 - 79                    | 5.0 (4.0)          | 1,14         | 1.5 (1.0)        | 0,5          | 2.6 (1.7)        | 0,9          | 2.8 (4.1)         | 0,32         | 2.1 (1.8)         | 0,17         |
| 80 +                       | 4.2 (2.0)          | 2,8          | 0.7 (1.0)        | 0,3          | 0.7 (1.9)        | 0,9          | 0.2 (0.8)         | 0,7          | 0.5 (1.1)         | 0,4          |
| <b>Sex of participants</b> |                    |              |                  |              |                  |              |                   |              |                   |              |
| Female                     | 21.3 (31.5)        | 1,512        | 2 (1.9)          | 0,16         | 3.4 (5.5)        | 0,102        | 6.6 (18.6)        | 0,186        | 6.5 (28.1)        | 0,493        |
| Male                       | 17.3 (18.0)        | 1,310        | 2 (1.8)          | 0,12         | 3.2 (3.7)        | 0,93         | 5.7 (18.2)        | 0,500        | 7.3 (24.3)        | 0,674        |
| <b>Household size</b>      |                    |              |                  |              |                  |              |                   |              |                   |              |
| 1                          | 11.0 (18.3)        | 1,158        | 0.7 (1.3)        | 0,12         | 1.6 (2.4)        | 0,42         | 2.8 (9.0)         | 0,150        | 5.3 (30.3)        | 0,674        |
| 2                          | 10.1 (19.9)        | 1,512        | 1.3 (1.5)        | 0,11         | 3.3 (7.6)        | 0,101        | 8.4 (24.0)        | 0,132        | 4.9 (17.8)        | 0,532        |
| 3                          | 16.7 (23.7)        | 1,310        | 2.0 (1.4)        | 0,11         | 3.3 (3.5)        | 0,102        | 4.1 (7.9)         | 0,186        | 8.0 (40.3)        | 0,493        |
| 4 or more                  | 25.5 (26.2)        | 2,260        | 3.4 (1.8)        | 0,16         | 4.1 (2.9)        | 0,32         | 7.5 (20.9)        | 0,500        | 8.6 (15.2)        | 0,109        |

|                 | POLYMOD            |              | COVIMOD          |              |                  |              |                   |              |                   |              |
|-----------------|--------------------|--------------|------------------|--------------|------------------|--------------|-------------------|--------------|-------------------|--------------|
|                 |                    |              | Wave 1           |              | Wave 2           |              | Wave 3            |              | Wave 4            |              |
|                 | Mean (SD)          | Min, Max     | Mean (SD)        | Min, Max     | Mean (SD)        | Min, Max     | Mean (SD)         | Min, Max     | Mean (SD)         | Min, Max     |
|                 | <b>18.9 (24.6)</b> | <b>1,512</b> | <b>2.0 (1.9)</b> | <b>0, 16</b> | <b>3.3 (4.7)</b> | <b>0,102</b> | <b>6.2 (18.4)</b> | <b>0,500</b> | <b>6.9 (26.3)</b> | <b>0,674</b> |
| <b>Weekdays</b> |                    |              |                  |              |                  |              |                   |              |                   |              |
| Monday          | 19.1 (14.3)        | 1,124        | 2.6 (1.7)        | 0,6          | 3.6 (3.2)        | 0,24         | 7.2 (14.2)        | 0,60         | 8.0 (26.8)        | 0,674        |
| Tuesday         | 23.7 (36.3)        | 1,512        | 2.8 (2.4)        | 0,8          | 4.1 (5.2)        | 0,102        | 6.0 (6.8)         | 0,32         | 15.4 (54.9)       | 0,493        |
| Wednesday       | 16.1 (23.3)        | 1,158        | 3.3 (3.2)        | 0,13         | 3.0 (3.5)        | 0,42         | 8.1 (16.3)        | 0,80         | 6.2 (14.2)        | 0,109        |
| Thursday        | 11.5 (13.5)        | 1,260        | 1.9 (1.8)        | 0,16         | 3.2 (3.8)        | 0,93         | 8.4 (23.6)        | 0,186        | 3.9 (11.0)        | 0,216        |
| Friday          | 22.5 (35.3)        | 1,162        | 2.1 (2.1)        | 0,8          | 4.4 (3.9)        | 0,32         | 9.0 (35.0)        | 0,500        | 4.8 (15.7)        | 0,238        |
| Saturday        | 22.7 (27.0)        | 1,215        | 1.8 (1.4)        | 0,8          | 4.0 (9.8)        | 0,101        | 2.9 (2.5)         | 0,33         | 6.0 (11.9)        | 0,95         |
| Sunday          | 24.5 (19.0)        | 1,96         | 1.9 (1.5)        | 0,12         | 2.5 (2.6)        | 0,21         | 3.2 (6.7)         | 0,99         | 3.1 (8.6)         | 0,126        |

1.2.b. Table 1.2.b Number of recorded overall contacts per different settings in the COVIMOD survey Waves 1 to 4 and the POLYMOD survey for the weighted analysis including group contacts.

**Note:** *The displayed educational contacts are based on the group of participants who attended an educational facility (kindergarten, school, university) and work contacts are based on the group of participants who reported to work full-/part-time*

|             | POLYMOD     |          | COVIMOD   |          |           |          |            |          |            |          |
|-------------|-------------|----------|-----------|----------|-----------|----------|------------|----------|------------|----------|
|             |             |          | Wave 1    |          | Wave 2    |          | Wave 3     |          | Wave 4     |          |
|             | Mean (SD)   | Min, Max | Mean (SD) | Min, Max | Mean (SD) | Min, Max | Mean (SD)  | Min, Max | Mean (SD)  | Min, Max |
| Overall     | 18.9 (24.6) | 1,512    | 2.0 (1.9) | 0,16     | 3.3 (4.7) | 0,102    | 6.2 (18.4) | 0,500    | 6.9 (26.3) | 0,674    |
| Home        | 3.3 (2.3)   | 0,26     | 1.6 (1.5) | 0,12     | 1.8 (1.7) | 0,9      | 1.6 (1.5)  | 0,13     | 1.6 (1.6)  | 0,23     |
| Educational | 1.8 (3.8)   | 0,42     | 0.0 (0.2) | 0,3      | 0.2 (0.9) | 0,10     | 0.1 (1.0)  | 0,17     | 0.7 (3.0)  | 0,60     |
| Work        | 20.3 (29.5) | 0,509    | 0.2 (0.9) | 0,11     | 1.5 (6.1) | 0,100    | 5.6 (20.4) | 0,140    | 5.6 (30.9) | 0,491    |
| Transport   | 0.6 (1.7)   | 0,8      | 0.0 (0.2) | 0,3      | 0.1 (0.4) | 0,4      | 0.0 (0.2)  | 0,8      | 0.1 (0.5)  | 0,12     |
| Others      | 3.4 (4.6)   | 0,45     | 0.4 (1.0) | 0,10     | 0.9 (1.8) | 0,33     | 1.5 (4.9)  | 0,149    | 2.1 (14.1) | 0,674    |

### 1.3. Comparison of the relative reduction in transmission dynamics

1.3.a. Table 1.3a Comparison of the relative reduction in transmission dynamics based on different input data. Given are the mean and bootstrapped 95% confidence interval of the relative percentage reduction of the R estimates from the RKI compared to the basic reproduction number and the relative reduction in the number of social contacts from COVIMOD compared to estimates from POLYMOD as well as of mobility estimates compared to pre-pandemic mobility for the weighted analysis including group contact.

|                                            | COVIMOD             | R (RKI)             | Google                | Apple                 |
|--------------------------------------------|---------------------|---------------------|-----------------------|-----------------------|
| Relative Mean Percentage Reduction (95%CI) |                     |                     |                       |                       |
| <b>Overall</b>                             |                     |                     |                       |                       |
| 30th April - 6th May 2020                  | 89.30 (86.44,91.71) | 67.00 (69.00,64.00) | 24.31 (36.37,17.66)   | 36.77 (41.31, 32.79)  |
| 14th May - 21st May 2020                   | 82.56 (77.78,86.32) | 66.00 (69.00,62.00) | 16.85 (26.87, 9.80)   | 15.65 (19.90, 10.67)  |
| 28th May - 4th June 2020                   | 67.32 (53.40,78.36) | 60.00 (64.00,55.00) | 13.05 (23.80, 5.65)   | -5.18 (-0.74,-10.19)  |
| 11th June - 22nd June 2020                 | 63.23 (48.75,74.27) | 68.00 (71.00,65.00) | 10.63 (16.25, 6.28)   | -11.65 (-8.31,-15.99) |
| <b>Home</b>                                |                     |                     |                       |                       |
| 30th April - 6th May 2020                  | 52.78 (44.43,59.60) | -                   | -12.71 (-9.14,-18.42) | -                     |
| 14th May - 21st May 2020                   | 45.80 (34.90,54.45) | -                   | -8.62 (-6.00,-11.62)  | -                     |
| 28th May - 4th June 2020                   | 49.89 (40.56,58.24) | -                   | -6.88 (-3.88,-10.12)  | -                     |
| 11th June - 22nd June 2020                 | 52.27 (44.11,59.42) | -                   | -5.25 (-3.17, -7.91)  | -                     |
| <b>Educational</b>                         |                     |                     |                       |                       |
| 30th April - 6th May 2020                  | 97.97 (94.07,99.73) | -                   | -                     | -                     |
| 14th May - 21st May 2020                   | 86.52 (66.17,96.21) | -                   | -                     | -                     |
| 28th May - 4th June 2020                   | 91.58 (75.25,98.69) | -                   | -                     | -                     |
| 11th June - 22nd June 2020                 | 57.11 ( 9.51,83.37) | -                   | -                     | -                     |
| <b>Work</b>                                |                     |                     |                       |                       |
| 30th April - 6th May 2020                  | 98.77 (97.80,99.39) | -                   | 34.71 (52.42,23.58)   | -                     |
| 14th May - 21st May 2020                   | 92.52 (87.66,95.69) | -                   | 27.00 (45.10,13.87)   | -                     |
| 28th May - 4th June 2020                   | 71.53 (43.22,89.40) | -                   | 24.12 (42.00, 9.00)   | -                     |
| 11th June - 22nd June 2020                 | 72.10 (46.45,86.23) | -                   | 16.50 (28.50, 5.17)   | -                     |



|                                                   | <b>COVIMOD</b>      | <b>R (RKI)</b> | <b>Google</b>       | <b>Apple</b> |
|---------------------------------------------------|---------------------|----------------|---------------------|--------------|
| <b>Relative Mean Percentage Reduction (95%CI)</b> |                     |                |                     |              |
| <b>Transport</b>                                  |                     |                |                     |              |
| 30th April - 6th May 2020                         | 91.16 (74.80,97.95) | -              | 42.14 (50.85,36.86) | -            |
| 14th May - 21st May 2020                          | 76.52 (27.74,94.47) | -              | 31.75 (36.38,27.88) | -            |
| 28th May - 4th June 2020                          | 91.15 (73.46,97.98) | -              | 25.12 (31.12,19.63) | -            |
| 11th June - 22nd June 2020                        | 72.02 (23.62,93.37) | -              | 23.00 (27.00,19.67) | -            |
| <b>Others</b>                                     |                     |                |                     |              |
| 30th April - 6th May 2020                         | 86.70 (80.86,91.55) | -              | 28.71 (49.35,16.14) | -            |
| 14th May - 21st May 2020                          | 71.41 (57.60,81.67) | -              | 17.06 (34.31, 3.94) | -            |
| 28th May - 4th June 2020                          | 54.29 (29.00,72.34) | -              | 11.44 (27.37, 0.32) | -            |
| 11th June - 22nd June 2020                        | 34.23 (-3.36,60.00) | -              | 9.46 (17.50, 3.09)  | -            |

1.3.b. Table 1.3b Effective reproduction number at the timing of COVIMOD survey Waves 1 to 4, estimated effective reproduction number based on the reduction of social contacts at the times of COVIMOD survey Waves 1 to 4 assuming values of the basic reproduction number of Norm (2.6, SD=0.54) with 10000 bootstrapped samples in various settings and in different time frames for the weighted analysis including group contacts

|                            | COVIMOD                          |                                | R (RKI)                          |                                |
|----------------------------|----------------------------------|--------------------------------|----------------------------------|--------------------------------|
|                            | Mean reproduction number (95%CI) | Percent Mean Reduction (95%CI) | Mean reproduction number (95%CI) | Percent Mean Reduction (95%CI) |
| <b>Overall</b>             |                                  |                                |                                  |                                |
| 30th April - 6th May 2020  | 0.25<br>(0.14,0.36)              | 91.00<br>(95.00,87.00)         | 0.88 (0.82,0.94)                 | 67.00<br>(69.00,64.00)         |
| 14th May - 21st May 2020   | 0.36<br>(0.21,0.53)              | 87.00<br>(92.00,80.00)         | 0.91 (0.81,1.00)                 | 66.00<br>(69.00,62.00)         |
| 28th May - 4th June 2020   | 0.54<br>(0.29,0.83)              | 80.00<br>(89.00,69.00)         | 1.06 (0.94,1.19)                 | 60.00<br>(64.00,55.00)         |
| 11th June - 22nd June 2020 | 0.68<br>(0.35,1.18)              | 74.00<br>(87.00,55.00)         | 0.84 (0.76,0.91)                 | 68.00<br>(71.00,65.00)         |
| <b>Home</b>                |                                  |                                |                                  |                                |
| 30th April - 6th May 2020  | 1.39<br>(0.82,2.01)              | 47.00<br>(69.00,23.00)         | -                                | -                              |
| 14th May - 21st May 2020   | 1.37<br>(0.80,1.99)              | 48.00<br>(70.00,24.00)         | -                                | -                              |
| 28th May - 4th June 2020   | 1.44<br>(0.82,2.11)              | 45.00<br>(69.00,19.00)         | -                                | -                              |
| 11th June - 22nd June 2020 | 1.27<br>(0.74,1.84)              | 52.00<br>(72.00,30.00)         | -                                | -                              |
| <b>Educational</b>         |                                  |                                |                                  |                                |
| 30th April - 6th May 2020  | 0.05<br>(0.01,0.15)              | 99.00<br>(100.00,95.00)        | -                                | -                              |
| 14th May - 21st May 2020   | 0.26<br>(0.04,0.92)              | 90.00<br>(99.00,65.00)         | -                                | -                              |
| 28th May - 4th June 2020   | 0.14<br>(0.03,0.40)              | 95.00<br>(99.00,85.00)         | -                                | -                              |
| 11th June - 22nd June 2020 | 0.82<br>(0.14,2.76)              | 69.00 (95.00,-6.00)            | -                                | -                              |
| <b>Work</b>                |                                  |                                |                                  |                                |
| 30th April - 6th May 2020  | 0.04<br>(0.02,0.07)              | 99.00<br>(100.00,98.00)        | -                                | -                              |
| 14th May - 21st May 2020   | 0.14<br>(0.07,0.23)              | 95.00<br>(98.00,92.00)         | -                                | -                              |
| 28th May - 4th June 2020   | 0.32<br>(0.14,0.61)              | 88.00<br>(95.00,77.00)         | -                                | -                              |

|                            | COVIMOD                          |                                | R (RKI)                          |                                |
|----------------------------|----------------------------------|--------------------------------|----------------------------------|--------------------------------|
|                            | Mean reproduction number (95%CI) | Percent Mean Reduction (95%CI) | Mean reproduction number (95%CI) | Percent Mean Reduction (95%CI) |
| 11th June - 22nd June 2020 | 0.33<br>(0.16,0.56)              | 88.00<br>(94.00,79.00)         | -                                | -                              |
| <b>Transport</b>           |                                  |                                |                                  |                                |
| 30th April - 6th May 2020  | 0.79<br>(0.12,2.87)              | 70.00 (96.00, -10.00)          | -                                | -                              |
| 14th May - 21st May 2020   | 1.11<br>(0.15,4.23)              | 58.00 (95.00, -62.00)          | -                                | -                              |
| 28th May - 4th June 2020   | 0.73<br>(0.11,2.70)              | 72.00 (96.00, -3.00)           | -                                | -                              |
| 11th June - 22nd June 2020 | 1.42<br>(0.17,6.25)              | 46.00 (94.00,-140.00)          | -                                | -                              |
| 30th April - 6th May 2020  | 0.29<br>(0.13,0.55)              | 89.00 (95.00, 79.00)           | -                                | -                              |
| 14th May - 21st May 2020   | 0.58<br>(0.27,1.09)              | 78.00 (90.00, 59.00)           | -                                | -                              |
| 28th May - 4th June 2020   | 1.07<br>(0.45,2.08)              | 59.00 (83.00, 20.00)           | -                                | -                              |
| 11th June - 22nd June 2020 | 1.36<br>(0.51,3.09)              | 48.00 (81.00,-18.00)           | -                                | -                              |

#### 1.4. Boxplots of the number of overall contacts

Boxes represent the 25<sup>th</sup>, 50<sup>th</sup> and 75<sup>th</sup> percentiles, the whiskers represent the 10<sup>th</sup> and 90<sup>th</sup> percentile and the white dots represent the mean. Participants with no contacts are displayed as 0 on the log-scale of the y-axis.

*Note: The displayed work contacts are based on the group of participants who reported to work full-/part-time.*

1.4.a. Figure 1.4a Displayed are the number of social contacts stratified by sex (a) Female and (b) Male for the weighted analysis including group contacts in overall contacts.

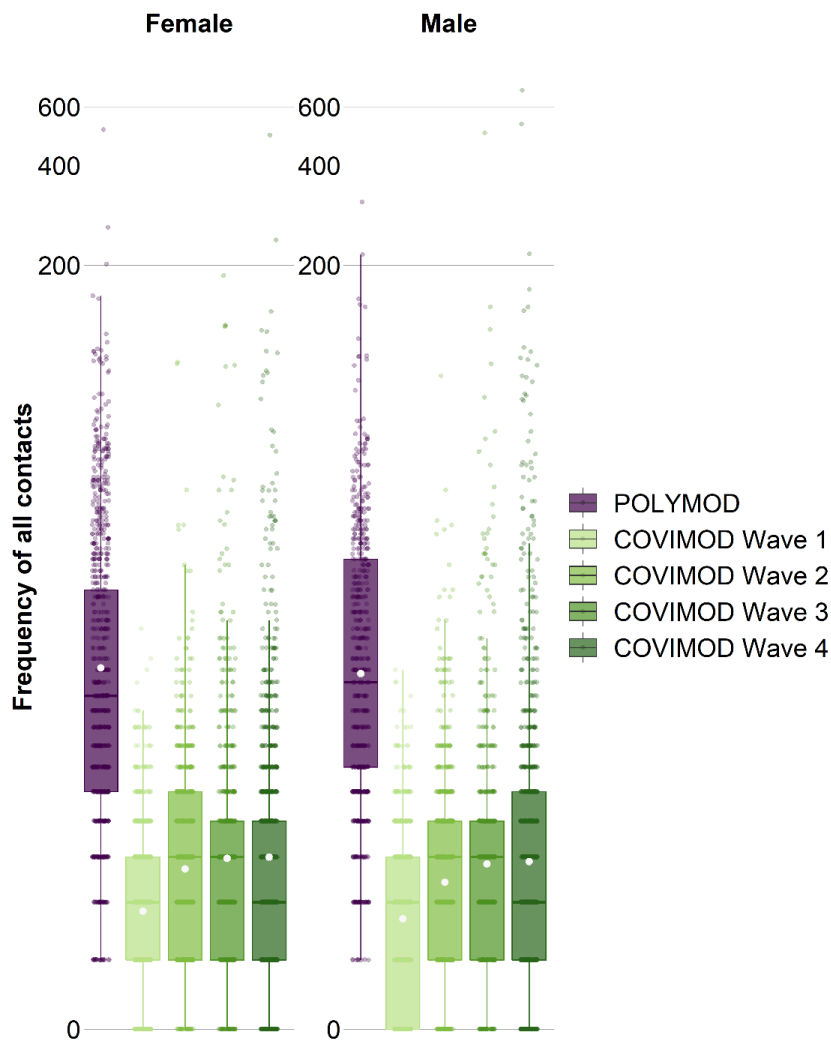

1.4.b. Figure 1.4b Displayed are the number of social contacts stratified by day of the week (a) Monday, (b) Tuesday, (c) Wednesday, (d) Thursday, (e) Friday, (f) Saturday and (g) Sunday for the weighted analysis including group contacts in overall contacts.

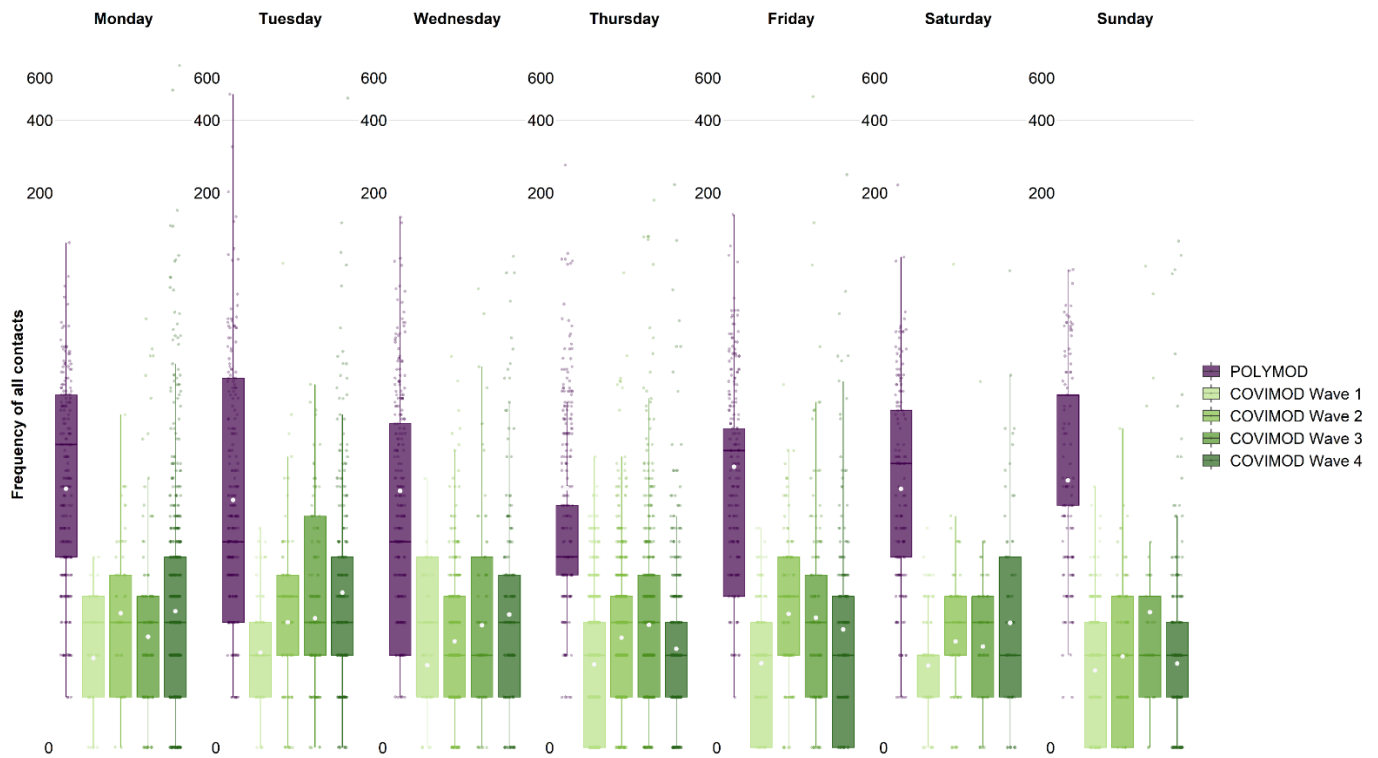

## 1.5. Social contact patterns

- 1.5. Figure 1.5 Social contact matrices with the mean total number of reported daily social contacts by participants in different age groups with individuals in other age groups in POLYMOD and COVIMOD survey waves 1 to 4 in various settings. Displayed are (a) the overall number of contacts, (b) home contacts, (c) educational contacts, (d) work contacts, (e) public transport contacts and (f) other contacts for the weighted analysis including group contacts.

**Note:** *Participants with more than more than 100 group contacts were removed in COVIMOD and POLYMOD. Specifically, 6 participants and 13 participants were removed in Wave 3 and Wave 4 respectively, while 10 participants were removed in POLYMOD.*

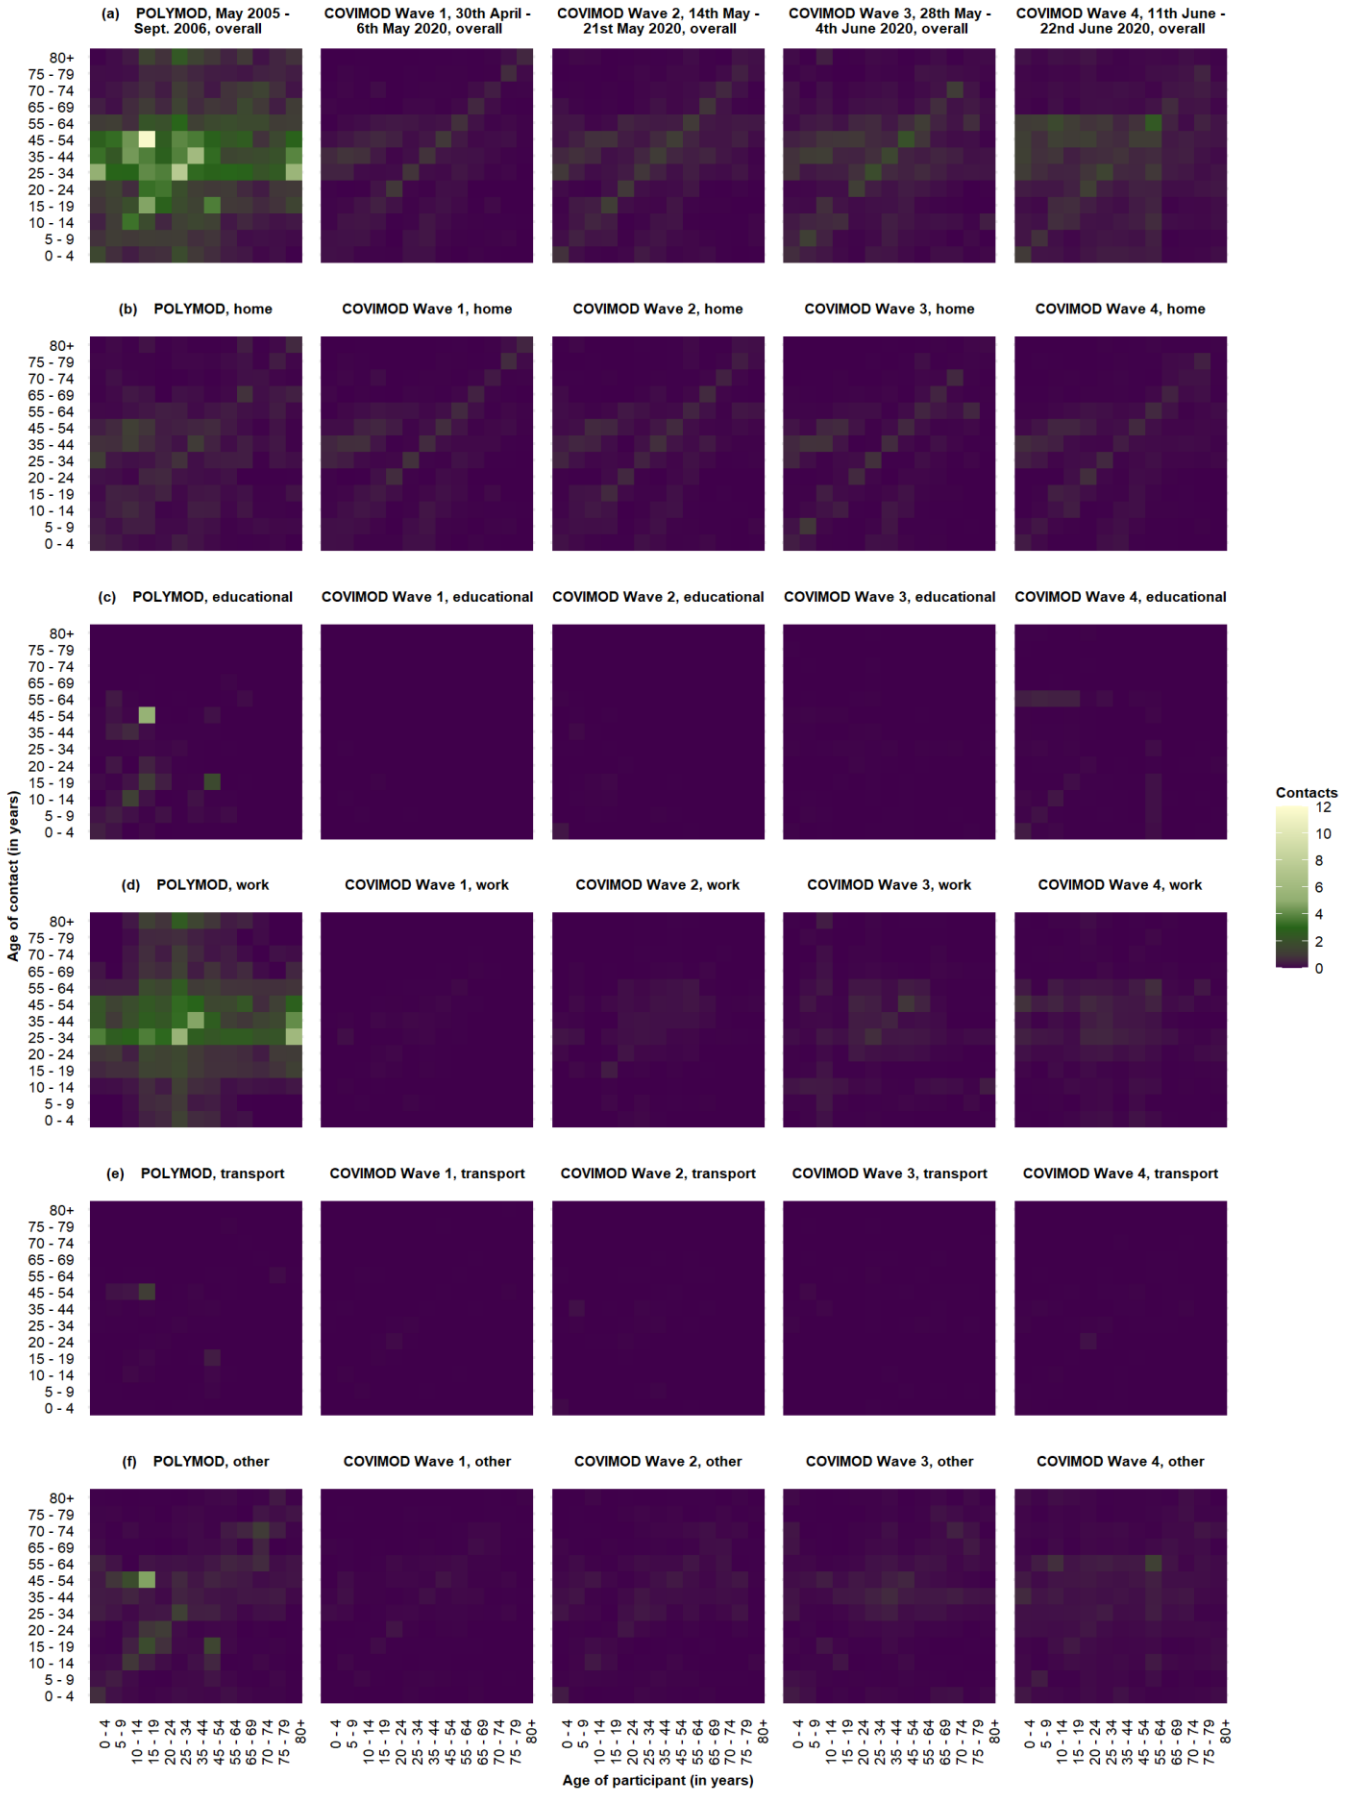

## 2. UNWEIGHTED ANALYSIS INCLUDING GROUP CONTACTS

COVIMOD Wave 3 - 4 as well as POLYMOD include group contacts

### 2.1. Participant characteristics

2.1.a. Table 2.1a Participant characteristics in the COVIMOD survey Waves 1 to 4 and in the POLYMOD survey for the unweighted analysis including group contacts

|                            | POLYMOD |         | COVIMOD |         |        |         |        |         |        |         |
|----------------------------|---------|---------|---------|---------|--------|---------|--------|---------|--------|---------|
|                            | N       | percent | Wave 1  |         | Wave 2 |         | Wave 3 |         | Wave 4 |         |
|                            |         |         | N       | percent | N      | percent | N      | percent | N      | percent |
|                            | 1341    | -       | 1560    | -       | 1356   | -       | 1081   | -       | 1890   | -       |
| <b>Age category</b>        |         |         |         |         |        |         |        |         |        |         |
| 0 - 4                      | 89      | 6.9     | 46      | 2.9     | 36     | 2.7     | 21     | 1.9     | 56     | 3.0     |
| 5 - 9                      | 92      | 7.1     | 48      | 3.1     | 41     | 3.0     | 30     | 2.8     | 62     | 3.3     |
| 10 - 14                    | 110     | 8.5     | 73      | 4.7     | 63     | 4.7     | 45     | 4.2     | 87     | 4.6     |
| 15 - 19                    | 121     | 9.3     | 95      | 6.1     | 66     | 4.9     | 45     | 4.2     | 108    | 5.7     |
| 20 - 24                    | 117     | 9.0     | 83      | 5.3     | 60     | 4.4     | 28     | 2.6     | 109    | 5.8     |
| 25 - 34                    | 132     | 10.2    | 173     | 11.1    | 148    | 10.9    | 96     | 8.9     | 219    | 11.6    |
| 35 - 44                    | 156     | 12.0    | 137     | 8.8     | 124    | 9.2     | 91     | 8.4     | 164    | 8.7     |
| 45 - 54                    | 184     | 14.2    | 235     | 15.1    | 209    | 15.4    | 174    | 16.1    | 275    | 14.6    |
| 55 - 64                    | 160     | 12.4    | 265     | 17.0    | 244    | 18.0    | 237    | 21.9    | 321    | 17.0    |
| 65 - 69                    | 74      | 5.7     | 270     | 17.3    | 245    | 18.1    | 199    | 18.4    | 313    | 16.6    |
| 70 - 74                    | 33      | 2.5     | 89      | 5.7     | 73     | 5.4     | 79     | 7.3     | 118    | 6.2     |
| 75 - 79                    | 14      | 1.1     | 35      | 2.2     | 34     | 2.5     | 29     | 2.7     | 48     | 2.5     |
| 80 +                       | 13      | 1.0     | 11      | 0.7     | 11     | 0.8     | 7      | 0.6     | 10     | 0.5     |
| Missing                    | 46      | -       | 0       | -       | 2      | -       | 0      | -       | 0      | -       |
| <b>Sex of participants</b> |         |         |         |         |        |         |        |         |        |         |
| Female                     | 722     | 55.4    | 748     | 48.1    | 638    | 47.1    | 536    | 49.6    | 901    | 47.8    |
| Male                       | 581     | 44.6    | 806     | 51.9    | 717    | 52.9    | 544    | 50.4    | 985    | 52.2    |
| Missing                    | 38      | -       | 6       | -       | 1      | -       | 1      | -       | 4      | -       |
| <b>Household size</b>      |         |         |         |         |        |         |        |         |        |         |
| 1                          | 250     | 18.6    | 232     | 14.9    | 256    | 18.9    | 268    | 24.8    | 487    | 25.8    |
| 2                          | 411     | 30.6    | 412     | 26.4    | 351    | 25.9    | 270    | 25.0    | 439    | 23.2    |
| 3                          | 339     | 25.3    | 514     | 32.9    | 447    | 33.0    | 343    | 31.7    | 544    | 28.8    |
| 4 or more                  | 341     | 25.4    | 402     | 25.8    | 302    | 22.3    | 200    | 18.5    | 420    | 22.2    |
| Missing                    | 0       | -       | 0       | -       | 0      | -       | 0      | -       | 0      | -       |
| <b>Weekdays</b>            |         |         |         |         |        |         |        |         |        |         |
| Monday                     | 227     | 17.2    | 50      | 3.2     | 60     | 4.4     | 128    | 11.8    | 642    | 34.0    |
| Tuesday                    | 237     | 18.0    | 63      | 4.0     | 89     | 6.6     | 143    | 13.2    | 246    | 13.0    |
| Wednesday                  | 222     | 16.8    | 54      | 3.5     | 293    | 21.6    | 87     | 8.0     | 172    | 9.1     |
| Thursday                   | 179     | 13.6    | 914     | 58.6    | 613    | 45.2    | 489    | 45.2    | 320    | 16.9    |
| Friday                     | 186     | 14.1    | 144     | 9.2     | 117    | 8.6     | 132    | 12.2    | 196    | 10.4    |
| Saturday                   | 152     | 11.5    | 88      | 5.6     | 63     | 4.6     | 66     | 6.1     | 81     | 4.3     |



|         | POLYMOD     |         | COVIMOD     |         |             |         |             |         |             |         |
|---------|-------------|---------|-------------|---------|-------------|---------|-------------|---------|-------------|---------|
|         |             |         | Wave 1      |         | Wave 2      |         | Wave 3      |         | Wave 4      |         |
|         | N           | percent | N           | percent | N           | percent | N           | percent | N           | percent |
|         | <b>1341</b> | -       | <b>1560</b> | -       | <b>1356</b> | -       | <b>1081</b> | -       | <b>1890</b> | -       |
| Sunday  | 117         | 8.9     | 247         | 15.8    | 121         | 8.9     | 36          | 3.3     | 233         | 12.3    |
| Missing | 21          | -       | 0           | -       | 0           | -       | 0           | -       | 0           | -       |

## 2.2. Number of social contacts

2.2.a. Table 2.2a Number of recorded overall contacts per participant per day stratified by age, gender, household size, and day of the week in the COVIMOD survey Waves 1 to 4 and the POLY MOD survey for the unweighted analysis including group contacts.

|                            | POLYMOD |             |          | COVIMOD |           |          |        |            |          |        |             |          |        |             |          |
|----------------------------|---------|-------------|----------|---------|-----------|----------|--------|------------|----------|--------|-------------|----------|--------|-------------|----------|
|                            |         |             |          | Wave 1  |           |          | Wave 2 |            |          | Wave 3 |             |          | Wave 4 |             |          |
|                            | N       | Mean (SD)   | Min, Max | N       | Mean (SD) | Min, Max | N      | Mean (SD)  | Min, Max | N      | Mean (SD)   | Min, Max | N      | Mean (SD)   | Min, Max |
|                            | 1341    | 20.2 (28.5) | 1,512    | 1560    | 2.1 (1.9) | 0,16     | 1356   | 3.6 (6.1)  | 0,102    | 1081   | 5.9 (20.3)  | 0,500    | 1890   | 7.1 (27.9)  | 0,674    |
| <b>Age category</b>        |         |             |          |         |           |          |        |            |          |        |             |          |        |             |          |
| 0 - 4                      | 89      | 9.1 (6.1)   | 2,30     | 46      | 3.8 (1.9) | 0,8      | 36     | 4.7 (2.7)  | 0,14     | 21     | 7.3 (6.5)   | 2, 24    | 56     | 12.9 (29.2) | 0,198    |
| 5 - 9                      | 92      | 8.4 (5.7)   | 2,43     | 48      | 3.5 (1.7) | 0,8      | 41     | 4.4 (3.2)  | 0,17     | 30     | 6.9 (6.7)   | 0, 27    | 62     | 6.4 (5.5)   | 0, 31    |
| 10 - 14                    | 110     | 13.3 (12.6) | 2,61     | 73      | 3.2 (1.8) | 0,12     | 63     | 3.3 (2.0)  | 0,9      | 45     | 19.0 (76.1) | 0,500    | 87     | 9.9 (17.7)  | 0,110    |
| 15 - 19                    | 121     | 32.8 (28.6) | 1,215    | 95      | 3.3 (2.0) | 0,8      | 66     | 4.1 (3.7)  | 0,20     | 45     | 5.1 (6.0)   | 0, 27    | 108    | 11.1 (20.2) | 0,113    |
| 20 - 24                    | 117     | 29.1 (32.9) | 1,310    | 83      | 2.0 (2.6) | 0,16     | 60     | 3.0 (3.3)  | 0,20     | 28     | 5.7 (9.7)   | 0, 45    | 109    | 9.9 (23.6)  | 0,169    |
| 25 - 34                    | 132     | 31.9 (50.9) | 2,512    | 173     | 1.7 (1.8) | 0,13     | 148    | 2.8 (3.2)  | 0,18     | 96     | 5.2 (12.7)  | 0,100    | 219    | 7.1 (19.0)  | 0,150    |
| 35 - 44                    | 156     | 25.0 (21.7) | 1,111    | 137     | 1.9 (2.2) | 0,11     | 124    | 3.0 (3.7)  | 0,33     | 91     | 7.8 (22.3)  | 0,150    | 164    | 8.1 (53.2)  | 0,674    |
| 45 - 54                    | 184     | 26.2 (35.1) | 1,260    | 235     | 1.8 (1.7) | 0,9      | 209    | 4.0 (10.3) | 0,102    | 174    | 4.6 (11.3)  | 0,131    | 275    | 9.4 (47.0)  | 0,532    |
| 55 - 64                    | 160     | 13.9 (19.5) | 1,150    | 265     | 1.9 (1.7) | 0,12     | 244    | 3.7 (5.1)  | 0,42     | 237    | 5.6 (16.1)  | 0,186    | 321    | 4.7 (11.6)  | 0,127    |
| 65 - 69                    | 74      | 8.6 (10.6)  | 1,58     | 270     | 1.8 (1.7) | 0,11     | 245    | 3.9 (7.6)  | 0,93     | 199    | 5.2 (12.5)  | 0,101    | 313    | 5.4 (16.9)  | 0,216    |
| 70 - 74                    | 33      | 5.8 (5.7)   | 1,25     | 89      | 1.8 (1.5) | 0,8      | 73     | 3.1 (3.5)  | 0,25     | 79     | 3.2 (2.5)   | 0, 13    | 118    | 3.1 (4.5)   | 0, 37    |
| 75 - 79                    | 14      | 4.6 (3.7)   | 1,14     | 35      | 1.7 (1.4) | 0,5      | 34     | 2.6 (2.1)  | 0,9      | 29     | 3.9 (5.9)   | 0, 32    | 48     | 3.2 (3.0)   | 0, 17    |
| 80 +                       | 13      | 3.7 (1.8)   | 2,8      | 11      | 1.1 (1.0) | 0,3      | 11     | 2.0 (2.8)  | 0,9      | 7      | 2.1 (2.4)   | 0, 7     | 10     | 1.7 (1.9)   | 0, 4     |
| <b>Sex of participants</b> |         |             |          |         |           |          |        |            |          |        |             |          |        |             |          |
| Female                     | 722     | 21.4 (31.4) | 1,512    | 748     | 2.2 (2.0) | 0,16     | 638    | 3.9 (6.8)  | 0,102    | 536    | 5.7 (15.1)  | 0,186    | 901    | 6.5 (22.3)  | 0,493    |

|                       | POLYMOD |             |          | COVIMOD |           |          |        |            |          |        |             |          |        |            |          |
|-----------------------|---------|-------------|----------|---------|-----------|----------|--------|------------|----------|--------|-------------|----------|--------|------------|----------|
|                       |         |             |          | Wave 1  |           |          | Wave 2 |            |          | Wave 3 |             |          | Wave 4 |            |          |
|                       | N       | Mean (SD)   | Min, Max | N       | Mean (SD) | Min, Max | N      | Mean (SD)  | Min, Max | N      | Mean (SD)   | Min, Max | N      | Mean (SD)  | Min, Max |
|                       | 1341    | 20.2 (28.5) | 1,512    | 1560    | 2.1 (1.9) | 0,16     | 1356   | 3.6 (6.1)  | 0,102    | 1081   | 5.9 (20.3)  | 0,500    | 1890   | 7.1 (27.9) | 0,674    |
| Male                  | 581     | 19.1 (24.9) | 1,310    | 806     | 2.0 (1.8) | 0,12     | 717    | 3.3 (5.3)  | 0,93     | 544    | 6.0 (24.4)  | 0,500    | 985    | 7.5 (31.7) | 0,674    |
| <b>Household size</b> |         |             |          |         |           |          |        |            |          |        |             |          |        |            |          |
| 1                     | 250     | 18.3 (23.7) | 1,158    | 232     | 0.8 (1.5) | 0,12     | 256    | 2.1 (4.2)  | 0,42     | 268    | 3.6 (11.2)  | 0,150    | 487    | 5.9 (34.6) | 0,674    |
| 2                     | 411     | 19.9 (34.1) | 1,512    | 412     | 1.3 (1.6) | 0,11     | 351    | 3.8 (8.4)  | 0,101    | 270    | 6.3 (17.6)  | 0,132    | 439    | 6.8 (30.4) | 0,532    |
| 3                     | 339     | 20.9 (27.9) | 1,310    | 514     | 2.2 (1.5) | 0,11     | 447    | 3.6 (6.0)  | 0,102    | 343    | 5.3 (12.6)  | 0,186    | 544    | 7.4 (27.2) | 0,493    |
| 4 or more             | 341     | 21.3 (24.6) | 2,260    | 402     | 3.5 (1.9) | 0,16     | 302    | 4.5 (3.5)  | 0,32     | 200    | 9.3 (36.9)  | 0,500    | 420    | 8.6 (14.3) | 0,109    |
| <b>Weekdays</b>       |         |             |          |         |           |          |        |            |          |        |             |          |        |            |          |
| Monday                | 227     | 17.4 (17.2) | 1,124    | 50      | 2.2 (1.7) | 0,6      | 60     | 4.3 (4.1)  | 0,24     | 128    | 4.6 (9.2)   | 0, 60    | 642    | 8.7 (37.1) | 0,674    |
| Tuesday               | 237     | 22.0 (45.8) | 1,512    | 63      | 2.4 (2.0) | 0,8      | 89     | 5.0 (11.2) | 0,102    | 143    | 4.6 (5.4)   | 0, 32    | 246    | 9.8 (34.8) | 0,493    |
| Wednesday             | 222     | 19.7 (23.8) | 1,158    | 54      | 2.3 (2.5) | 0,13     | 293    | 3.3 (4.4)  | 0,42     | 87     | 5.6 (11.9)  | 0, 80    | 172    | 7.2 (15.5) | 0,109    |
| Thursday              | 179     | 20.2 (27.8) | 1,260    | 914     | 2.1 (1.9) | 0,16     | 613    | 3.4 (5.5)  | 0,93     | 489    | 5.7 (15.8)  | 0,186    | 320    | 4.5 (15.6) | 0,216    |
| Friday                | 186     | 21.8 (22.7) | 1,162    | 144     | 2.1 (1.8) | 0,8      | 117    | 4.4 (4.5)  | 0,32     | 132    | 10.0 (46.0) | 0,500    | 196    | 5.9 (19.1) | 0,238    |
| Saturday              | 152     | 19.5 (24.5) | 1,215    | 88      | 2.0 (1.6) | 0,8      | 63     | 4.2 (12.6) | 0,101    | 66     | 2.9 (4.1)   | 0, 33    | 81     | 5.6 (11.7) | 0, 95    |
| Sunday                | 117     | 20.9 (21.9) | 1,96     | 247     | 1.9 (1.9) | 0,12     | 121    | 2.5 (2.8)  | 0,21     | 36     | 8.8 (20.7)  | 0, 99    | 233    | 5.1 (19.1) | 0,198    |

2.2.b. Table 2.2.b Number of recorded overall contacts per different settings in the COVIMOD survey Waves 1 to 4 and the POLYMOD survey for the unweighted analysis including group contacts.

**Note:** *The displayed educational contacts are based on the group of participants who attended an educational facility (kindergarten, school, university) and work contacts are based on the group of participants who reported to work full-/part-time*

|             | POLYMOD |             |          | COVIMOD |           |          |        |           |          |        |            |          |        |            |          |
|-------------|---------|-------------|----------|---------|-----------|----------|--------|-----------|----------|--------|------------|----------|--------|------------|----------|
|             |         |             |          | Wave 1  |           |          | Wave 2 |           |          | Wave 3 |            |          | Wave 4 |            |          |
|             | N       | Mean (SD)   | Min, Max | N       | Mean (SD) | Min, Max | N      | Mean (SD) | Min, Max | N      | Mean (SD)  | Min, Max | N      | Mean (SD)  | Min, Max |
| Overall     | 1341    | 20.2 (28.5) | 1,512    | 1560    | 2.1 (1.9) | 0,16     | 1356   | 3.6 (6.1) | 0,102    | 1081   | 5.9 (20.3) | 0,500    | 1890   | 7.1 (27.9) | 0,674    |
| Home        | 1341    | 2.8 (2.3)   | 0,26     | 1560    | 1.6 (1.5) | 0,12     | 1356   | 1.6 (1.6) | 0,9      | 1081   | 1.5 (1.5)  | 0,13     | 1890   | 1.5 (1.7)  | 0,23     |
| Educational | 199     | 2.8 (4.7)   | 0,42     | 310     | 0.0 (0.2) | 0,3      | 247    | 0.2 (1.0) | 0,10     | 179    | 0.3 (1.9)  | 0,17     | 385    | 1.2 (4.3)  | 0,60     |
| Work        | 715     | 18.5 (33.2) | 0,509    | 690     | 0.4 (1.2) | 0,11     | 613    | 2.0 (7.2) | 0,100    | 476    | 4.0 (15.1) | 0,140    | 809    | 4.6 (23.0) | 0,491    |
| Transport   | 1341    | 0.3 (0.8)   | 0,8      | 1560    | 0.0 (0.3) | 0,3      | 1356   | 0.1 (0.4) | 0,4      | 1081   | 0.1 (0.4)  | 0,8      | 1890   | 0.1 (0.6)  | 0,12     |
| Others      | 1341    | 3.0 (3.8)   | 0,45     | 1560    | 0.4 (1.0) | 0,10     | 1356   | 1.1 (2.4) | 0,33     | 1081   | 1.9 (6.7)  | 0,149    | 1890   | 2.8 (21.2) | 0,674    |

### 2.3. Comparison of the relative reduction in transmission dynamics

2.3.a. Table 2.3a Comparison of the relative reduction in transmission dynamics based on different input data. Given are the mean and bootstrapped 95% confidence interval of the relative percentage reduction of the R estimates from the RKI compared to the basic reproduction number and the relative reduction in the number of social contacts from COVIMOD compared to estimates from POLYMOD as well as of mobility estimates compared to pre-pandemic mobility for the unweighted analysis including group contact.

|                                                   | COVIMOD              | R (RKI)             | Google                 | Apple                  |
|---------------------------------------------------|----------------------|---------------------|------------------------|------------------------|
| <b>Relative Mean Percentage Reduction (95%CI)</b> |                      |                     |                        |                        |
| <b>Overall</b>                                    |                      |                     |                        |                        |
| 30th April - 6th May 2020                         | 89.65 (88.77,90.57)  | 67.00 (69.00,64.00) | 24.31 (36.37,17.66)    | 36.77 (41.31, 32.77)   |
| 14th May - 21st May 2020                          | 82.34 (80.15,84.35)  | 66.00 (69.00,62.00) | 16.85 (26.87, 9.80)    | 15.64 (19.91, 10.65)   |
| 28th May - 4th June 2020                          | 70.73 (62.72,76.83)  | 60.00 (64.00,55.00) | 13.05 (23.80, 5.65)    | -5.18 (-0.74, -10.19)  |
| 11th June - 22nd June 2020                        | 64.82 (57.75,71.02)  | 68.00 (71.00,65.00) | 10.63 (16.25, 6.28)    | -11.66 (-8.32, -15.99) |
| <b>Home</b>                                       |                      |                     |                        |                        |
| 30th April - 6th May 2020                         | 43.68 (39.85,47.19)  | -                   | -12.71 (-9.14, -18.42) | -                      |
| 14th May - 21st May 2020                          | 43.38 (39.52,47.18)  | -                   | -8.62 (-6.00, -11.62)  | -                      |
| 28th May - 4th June 2020                          | 47.66 (43.63,51.76)  | -                   | -6.88 (-3.88, -10.12)  | -                      |
| 11th June - 22nd June 2020                        | 46.96 (43.31,50.57)  | -                   | -5.25 (-3.17, -7.91)   | -                      |
| <b>Educational</b>                                |                      |                     |                        |                        |
| 30th April - 6th May 2020                         | 98.70 (97.40,99.66)  | -                   | -                      | -                      |
| 14th May - 21st May 2020                          | 91.33 (85.70,95.63)  | -                   | -                      | -                      |
| 28th May - 4th June 2020                          | 86.94 (73.96,95.88)  | -                   | -                      | -                      |
| 11th June - 22nd June 2020                        | 57.38 (35.49,74.19)  | -                   | -                      | -                      |
| <b>Work</b>                                       |                      |                     |                        |                        |
| 30th April - 6th May 2020                         | 98.10 (97.50,98.60)  | -                   | 34.71 (52.42,23.58)    | -                      |
| 14th May - 21st May 2020                          | 89.18 (84.97,92.18)  | -                   | 27.00 (45.10,13.88)    | -                      |
| 28th May - 4th June 2020                          | 78.18 (69.80,85.10)  | -                   | 24.12 (42.00, 9.00)    | -                      |
| 11th June - 22nd June 2020                        | 75.04 (64.86,83.16)  | -                   | 16.50 (28.50, 5.17)    | -                      |
| <b>Transport</b>                                  |                      |                     |                        |                        |
| 30th April - 6th May 2020                         | 83.09 (76.65,88.24)  | -                   | 42.14 (50.85,36.86)    | -                      |
| 14th May - 21st May 2020                          | 71.15 (61.32,79.27)  | -                   | 31.75 (36.38,27.88)    | -                      |
| 28th May - 4th June 2020                          | 75.02 (63.14,84.06)  | -                   | 25.12 (31.12,19.63)    | -                      |
| 11th June - 22nd June 2020                        | 61.91 (49.32,73.07)  | -                   | 23.00 (27.00,19.67)    | -                      |
| <b>Others</b>                                     |                      |                     |                        |                        |
| 30th April - 6th May 2020                         | 85.67 ( 83.65,87.43) | -                   | 28.71 (49.35,16.14)    | -                      |
| 14th May - 21st May 2020                          | 65.43 ( 60.51,69.75) | -                   | 17.06 (34.31, 3.94)    | -                      |
| 28th May - 4th June 2020                          | 38.89 ( 23.83,52.09) | -                   | 11.44 (27.37, 0.32)    | -                      |
| 11th June - 22nd June 2020                        | 7.93 (-28.09,34.95)  | -                   | 9.46 (17.50, 3.09)     | -                      |

2.3.b. Table 2.3b Effective reproduction number at the timing of COVIMOD survey Waves 1 to 4, estimated effective reproduction number based on the reduction of social contacts at the times of COVIMOD survey Waves 1 to 4 assuming values of the basic reproduction number of Norm (2.6, SD=0.54) and the reduction in mobility at the times of the COVIMOD survey Waves, with 10000 bootstrapped samples in various settings and in different time frames for the unweighted analysis including group contacts

|                            | COVIMOD                          |                                       | R (RKI)                          |                                       |
|----------------------------|----------------------------------|---------------------------------------|----------------------------------|---------------------------------------|
|                            | Mean reproduction number (95%CI) | Percent Mean Reduction Number (95%CI) | Mean reproduction number (95%CI) | Percent Mean Reduction Number (95%CI) |
| <b>Overall</b>             |                                  |                                       |                                  |                                       |
| 30th April - 6th May 2020  | 0.32 (0.19,0.45)                 | 88.00 (93.00,83.00)                   | 0.88 (0.82,0.94)                 | 67.00 (69.00,64.00)                   |
| 14th May - 21st May 2020   | 0.45 (0.27,0.64)                 | 83.00 (90.00,76.00)                   | 0.90 (0.81,0.99)                 | 66.00 (69.00,62.00)                   |
| 28th May - 4th June 2020   | 0.66 (0.38,0.95)                 | 75.00 (86.00,64.00)                   | 1.06 (0.94,1.19)                 | 60.00 (64.00,55.00)                   |
| 11th June - 22nd June 2020 | 0.78 (0.46,1.13)                 | 70.00 (83.00,57.00)                   | 0.84 (0.76,0.91)                 | 68.00 (71.00,65.00)                   |
| <b>Home</b>                |                                  |                                       |                                  |                                       |
| 30th April - 6th May 2020  | 1.60 (0.96,2.28)                 | 39.00 (64.00,13.00)                   | -                                | -                                     |
| 14th May - 21st May 2020   | 1.58 (0.93,2.24)                 | 40.00 (65.00,14.00)                   | -                                | -                                     |
| 28th May - 4th June 2020   | 1.56 (0.91,2.25)                 | 40.00 (65.00,14.00)                   | -                                | -                                     |
| 11th June - 22nd June 2020 | 1.41 (0.83,2.01)                 | 46.00 (69.00,23.00)                   | -                                | -                                     |
| <b>Educational</b>         |                                  |                                       |                                  |                                       |
| 30th April - 6th May 2020  | 0.07 (0.02,0.16)                 | 98.00 (100.00,94.00)                  | -                                | -                                     |
| 14th May - 21st May 2020   | 0.34 (0.12,0.76)                 | 87.00 (96.00,71.00)                   | -                                | -                                     |
| 28th May - 4th June 2020   | 0.53 (0.16,1.23)                 | 80.00 (94.00,53.00)                   | -                                | -                                     |
| 11th June - 22nd June 2020 | 1.24 (0.60,2.18)                 | 53.00 (77.00,17.00)                   | -                                | -                                     |
| <b>Work</b>                |                                  |                                       |                                  |                                       |
| 30th April - 6th May 2020  | 0.05 (0.03,0.08)                 | 99.00 (99.00,97.00)                   | -                                | -                                     |
| 14th May - 21st May 2020   | 0.18 (0.10,0.27)                 | 94.00 (97.00,90.00)                   | -                                | -                                     |
| 28th May - 4th June 2020   | 0.36 (0.19,0.57)                 | 87.00 (93.00,79.00)                   | -                                | -                                     |
| 11th June - 22nd June 2020 | 0.44 (0.25,0.66)                 | 84.00 (91.00,75.00)                   | -                                | -                                     |
| <b>Transport</b>           |                                  |                                       |                                  |                                       |

|                            | COVIMOD                          |                                       | R (RKI)                          |                                       |
|----------------------------|----------------------------------|---------------------------------------|----------------------------------|---------------------------------------|
|                            | Mean reproduction number (95%CI) | Percent Mean Reduction Number (95%CI) | Mean reproduction number (95%CI) | Percent Mean Reduction Number (95%CI) |
| 30th April - 6th May 2020  | 0.66 (0.31,1.16)                 | 75.00 (89.00,56.00)                   | -                                | -                                     |
| 14th May - 21st May 2020   | 0.94 (0.45,1.65)                 | 64.00 (83.00,37.00)                   | -                                | -                                     |
| 28th May - 4th June 2020   | 0.74 (0.33,1.35)                 | 72.00 (88.00,49.00)                   | -                                | -                                     |
| 11th June - 22nd June 2020 | 1.22 (0.57,2.45)                 | 54.00 (79.00, 6.00)                   | -                                | -                                     |
| <b>Others</b>              |                                  |                                       |                                  |                                       |
| 30th April - 6th May 2020  | 0.40 (0.23,0.64)                 | 85.00 (92.00,76.00)                   | -                                | -                                     |
| 14th May - 21st May 2020   | 0.72 (0.43,1.04)                 | 73.00 (84.00,60.00)                   | -                                | -                                     |
| 28th May - 4th June 2020   | 1.43 (0.79,2.24)                 | 46.00 (70.00,14.00)                   | -                                | -                                     |
| 11th June - 22nd June 2020 | 1.53 (0.88,2.26)                 | 42.00 (67.00,14.00)                   | -                                | -                                     |

## 2.4. Boxplots of the number of overall contacts in various settings

Boxes represent the 25<sup>th</sup>, 50<sup>th</sup> and 75<sup>th</sup> percentiles, the whiskers represent the 10<sup>th</sup> and 90<sup>th</sup> percentile and the white dots represent the mean. Participants with no contacts are displayed as 0 on the log-scale of the y-axis.

2.4.a. Figure 2.4a Displayed are the number of social contacts by setting: (a) the overall number of contacts, (b) home contacts, (c) educational contacts, (d) work contacts, (e) public transport contacts and (f) other contacts for the unweighted analysis including group contacts in overall contacts.

**Note:** *The displayed educational contacts are based on the group of participants who attended an educational facility (kindergarten, school, university) and work contacts are based on the group of participants who reported to work full-/part-time*

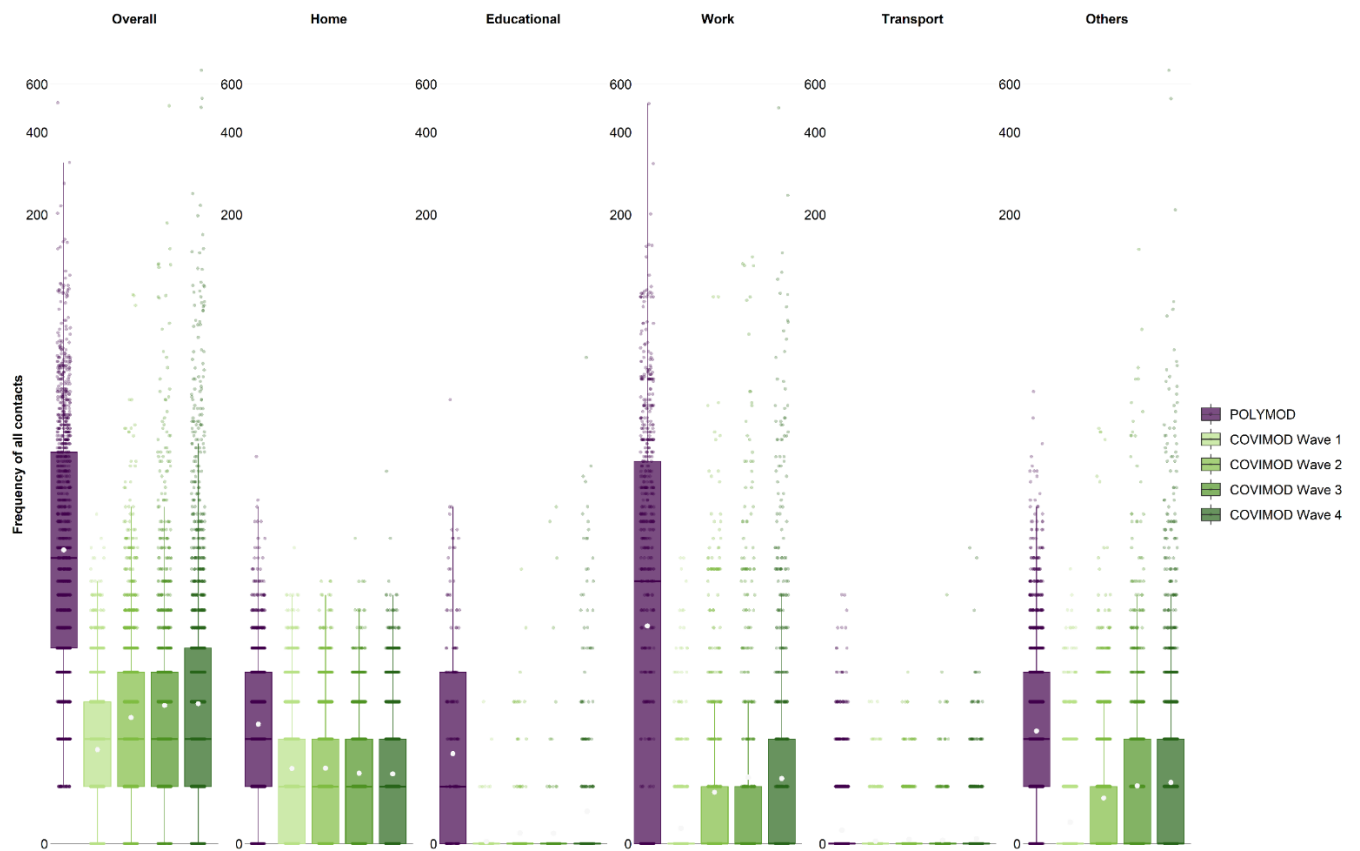



2.4.b. Figure 2.4b Displayed are the number of social contacts stratified by age (a) 0 - 7 years, (b) 8 – 15 years, (c) 16 – 23 years, (d) 24 – 38 years, (e) 39 – 60 years and (f) 61 years or more for the unweighted analysis including group contacts in overall contacts.

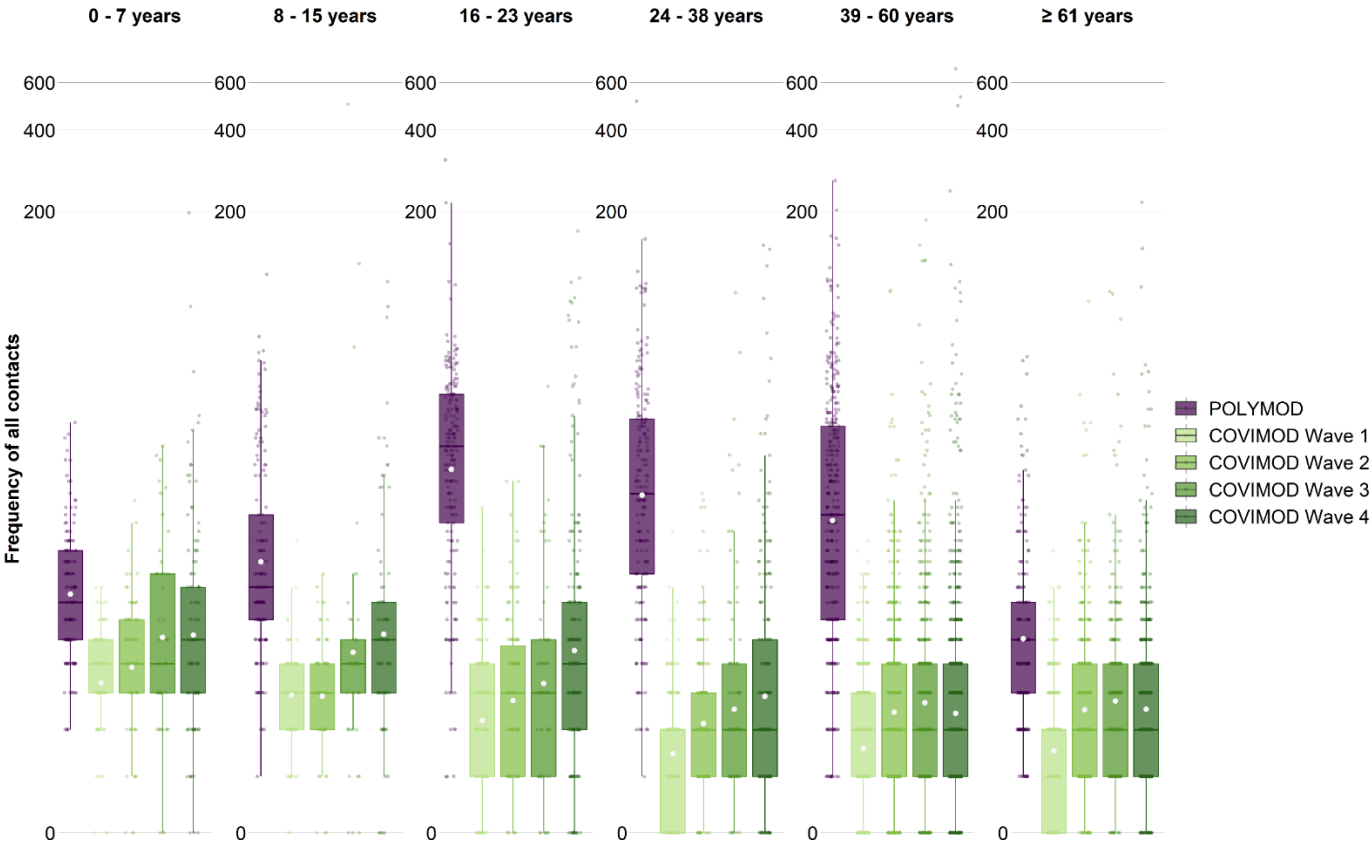

2.4.c. Figure 2.4c Displayed are the number of social contacts stratified by household size (a) Household size of 1, (b) Household size of 2, (c) Household size of 3 and (d) Household size of 4 or more for the unweighted analysis including group contacts in overall contacts.

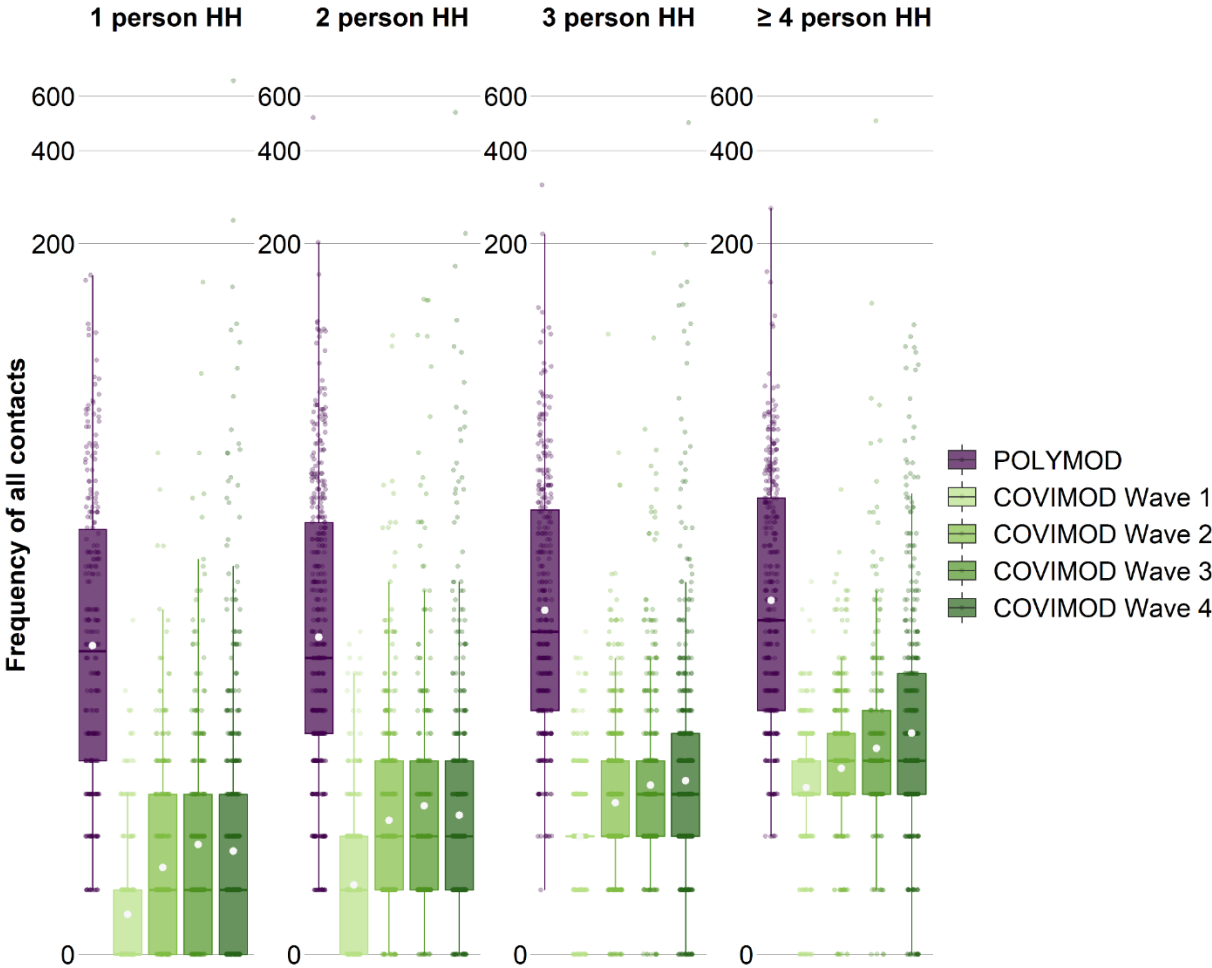

2.4.d. Figure 2.4d Displayed are the number of social contacts stratified by (a) Female and (b) Male for the unweighted analysis including group contacts in overall contacts.

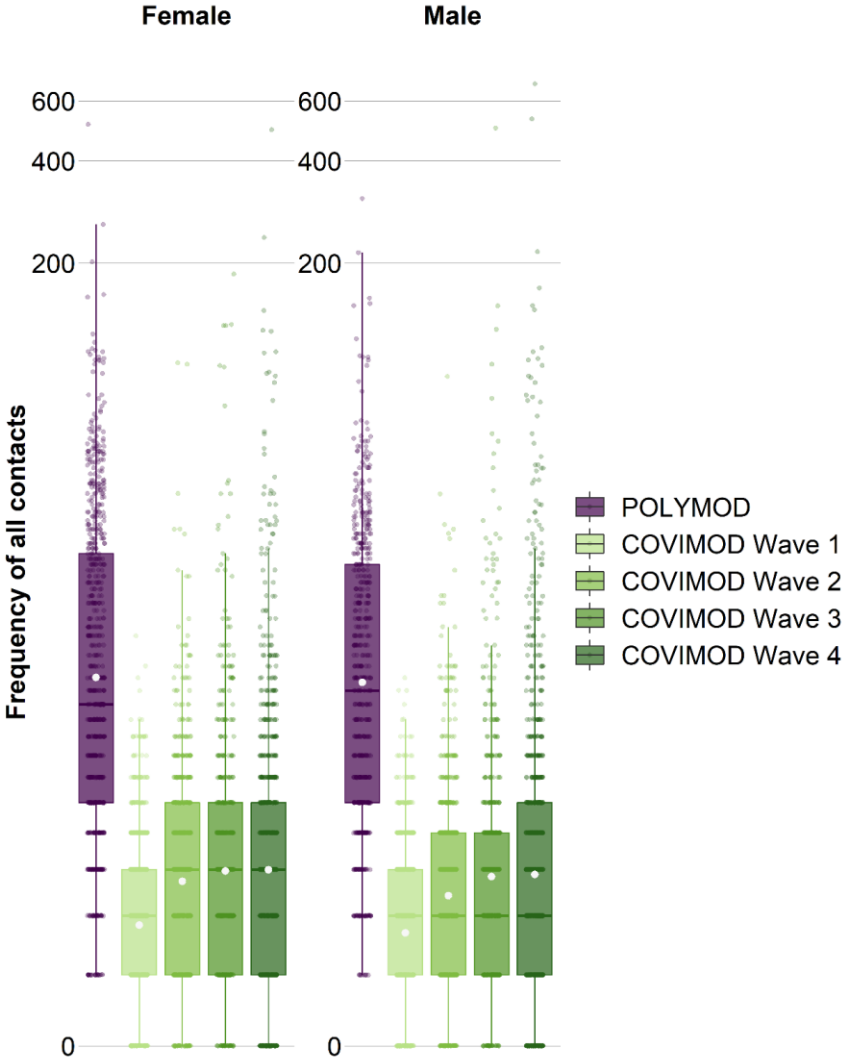

2.4.e. Figure 2.4e Displayed are the number of social contacts stratified by day of the week (a) Monday, (b) Tuesday, (c) Wednesday, (d) Thursday, (e) Friday, (f) Saturday and (g) Sunday for the unweighted analysis including group contacts in overall contacts.

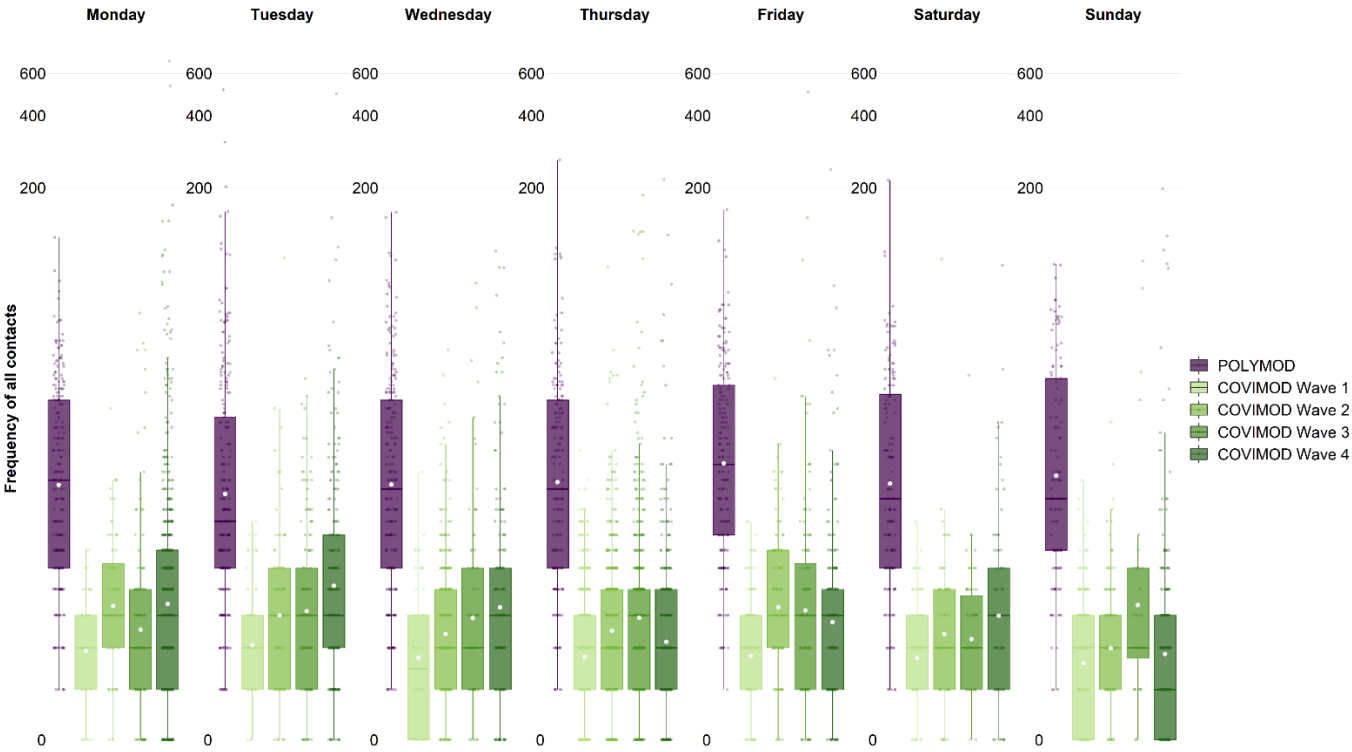

## 2.5. Social contact patterns

2.5.a. Figure 2.5a Social contact matrices with the mean total number of reported daily social contacts by participants in different age groups with individuals in other age groups in POLYMOD and COVIMOD survey waves 1 to 4 in various settings. Displayed are (a) the overall number of contacts, (b) home contacts, (c) educational contacts, (d) work contacts, (e) public transport contacts and (f) other contacts for the unweighted analysis including group contacts.

**Note:** *Participants with more than more than 100 group contacts were removed in COVIMOD and POLYMOD. Specifically, 6 participants and 13 participants were removed in Wave 3 and Wave 4 respectively, while 10 participants were removed in POLYMOD*

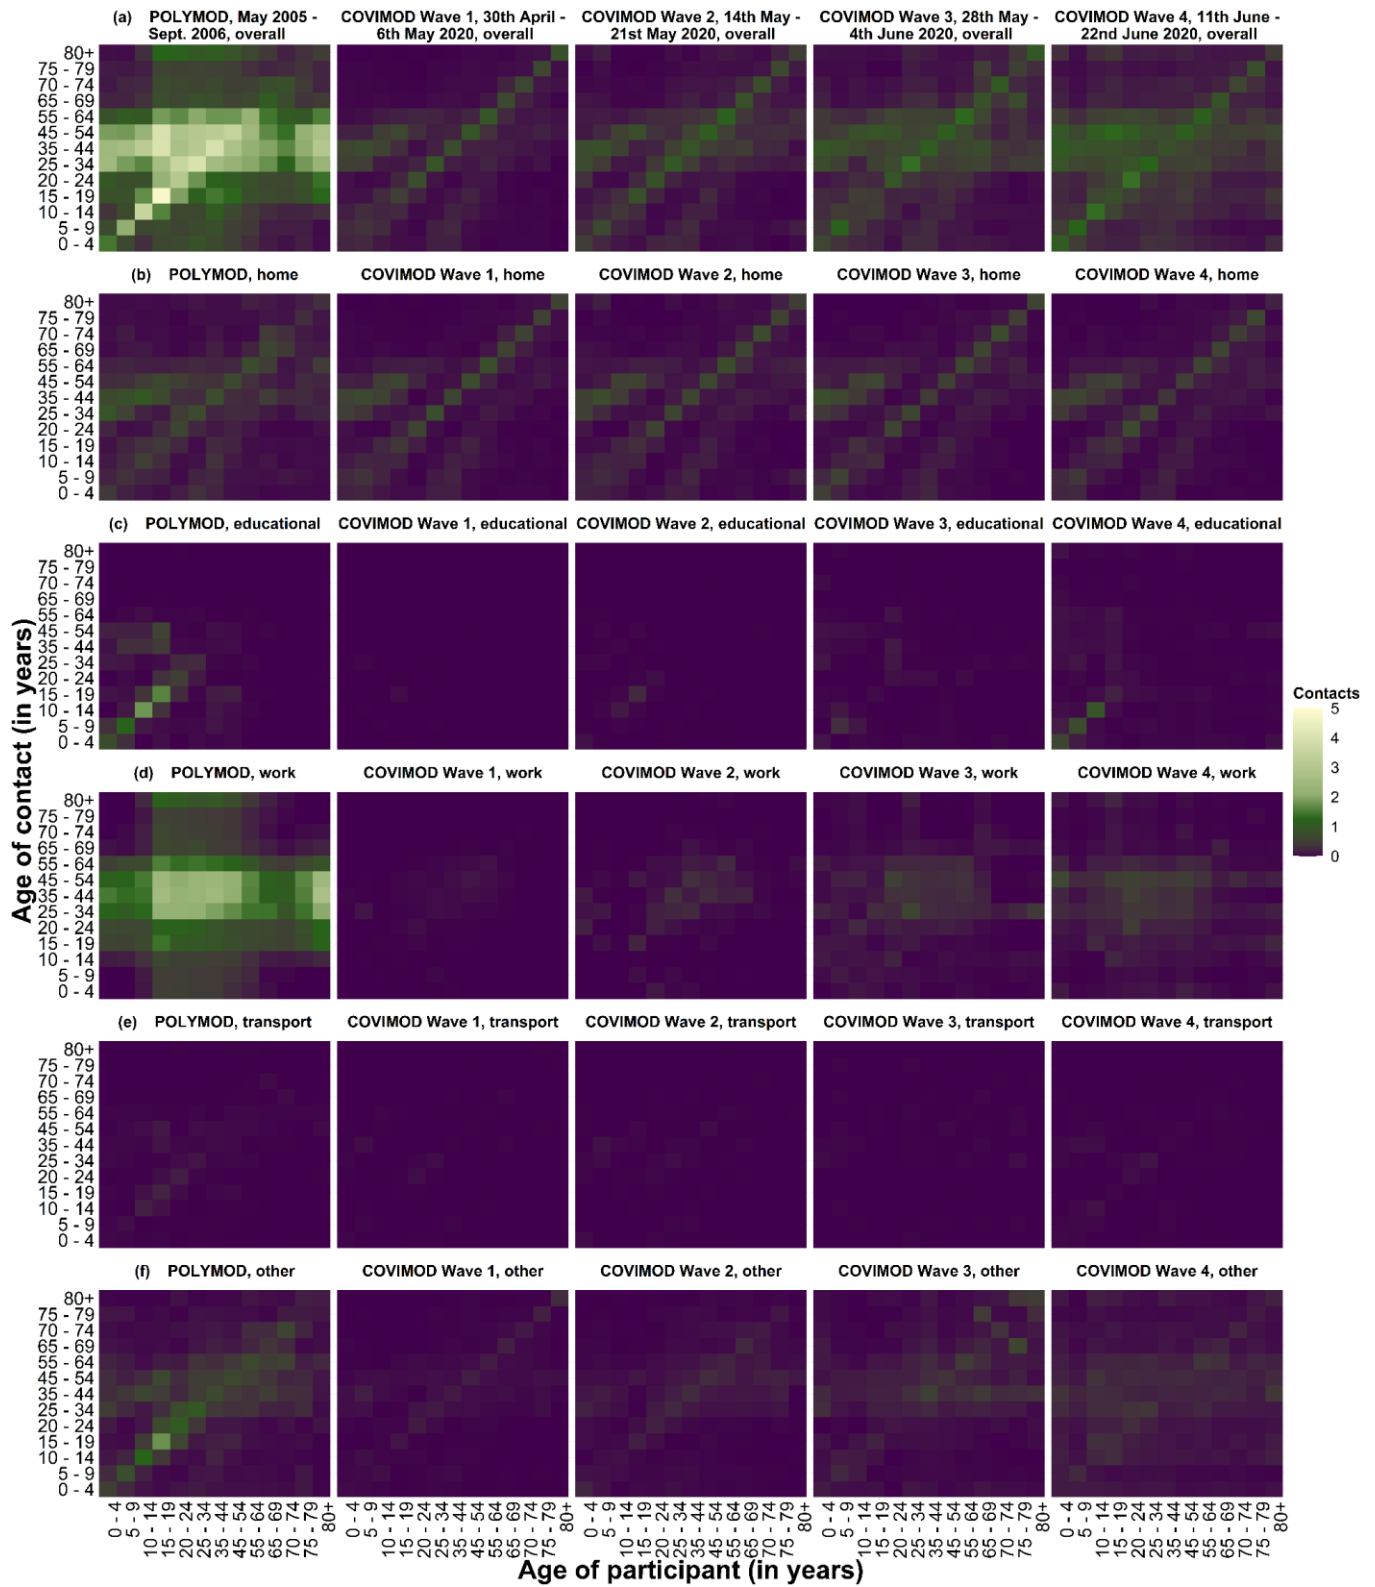

## 2.6. Relative reductions in transmission dynamics of SARS-CoV-2

2.6.a. Figure 2.6a Comparison of the relative reduction in transmission dynamics based on different input data.

Displayed are the mean and bootstrapped 95% confidence interval of the relative reduction of the R estimates from the RKI compared to the basic reproduction number and the relative reduction in the number of social contacts (COVIMOD-simple approach) as well as of mobility estimates compared to pre-pandemic times (A) displays the overall relative reduction and (B) displays the relative reduction by setting for the unweighted analysis including group contacts.

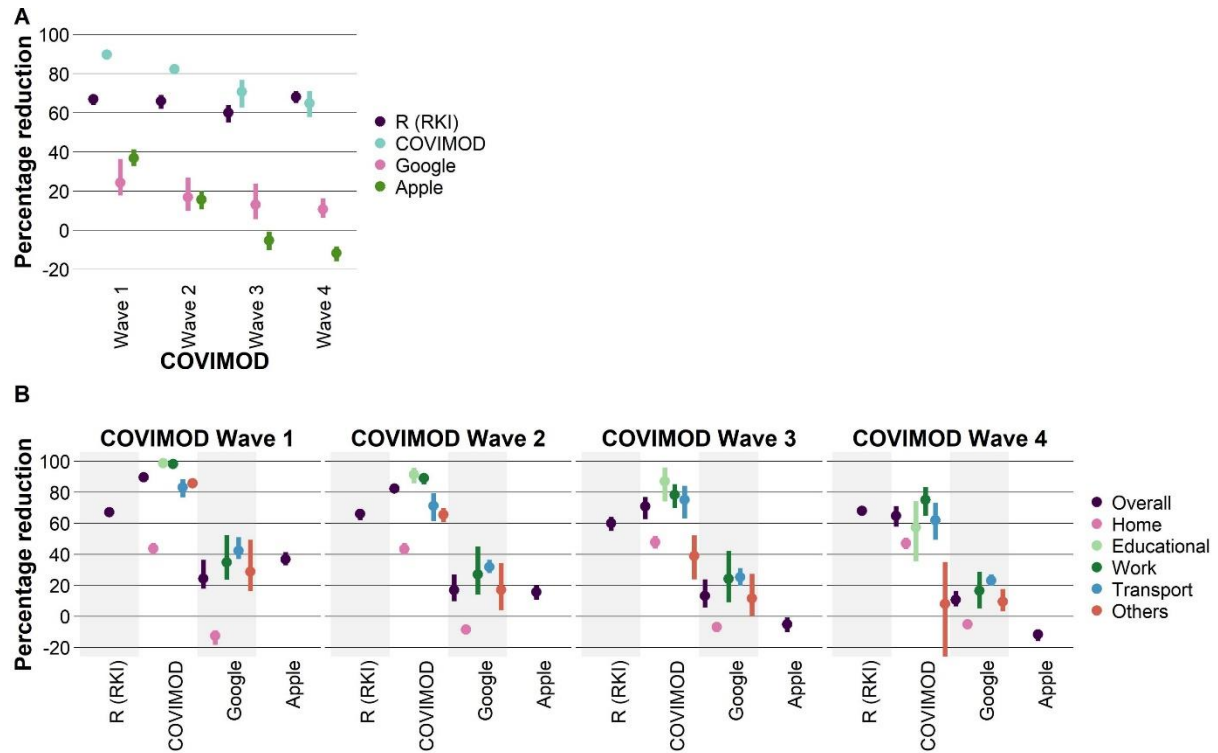

2.6.b. Figure 2.6b Comparison of the percentage reduction in transmission dynamics based on different input data.

Displayed are the mean and bootstrapped 95% confidence interval of the percentage reduction of the R estimates from the RKI and R estimates obtained from COVIMOD (complex approach) compared to the basic reproduction number and the percentage reduction of Google and Apple mobility data (A) displays the overall percentage reduction and (B) displays the percentage reduction by setting for the unweighted analysis including group contacts.

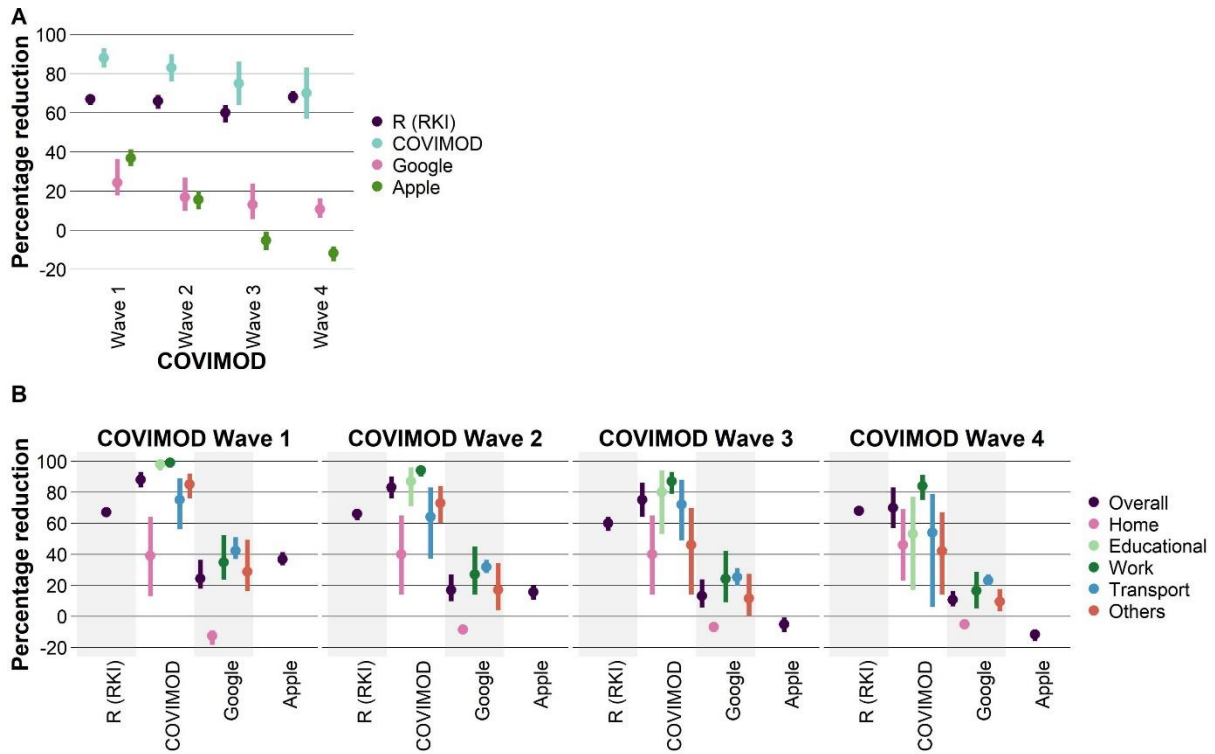



### 3. WEIGHTED ANALYSIS WITHOUT GROUP CONTACTS

#### 3.2. Number of social contacts

3.2.a. Table 3.2a Number of recorded overall contacts per participant per day stratified by age, gender, household size, and day of the week in the COVIMOD survey Waves 1 to 4 and the POLYMOD survey for the weighted analysis without group contacts.

|                            | POLYMOD          |             | COVIMOD          |             |                  |              |                  |              |                  |              |
|----------------------------|------------------|-------------|------------------|-------------|------------------|--------------|------------------|--------------|------------------|--------------|
|                            | Mean (SD)        | Min, Max    | Wave 1           |             | Wave 2           |              | Wave 3           |              | Wave 4           |              |
|                            |                  |             | Mean (SD)        | Min, Max    | Mean (SD)        | Min, Max     | Mean (SD)        | Min, Max     | Mean (SD)        | Min, Max     |
|                            | <b>8.4 (6.7)</b> | <b>1,58</b> | <b>2.0 (1.9)</b> | <b>0,16</b> | <b>3.3 (4.7)</b> | <b>0,102</b> | <b>3.3 (4.2)</b> | <b>0,101</b> | <b>3.1 (4.7)</b> | <b>0,100</b> |
| <b>Age category</b>        |                  |             |                  |             |                  |              |                  |              |                  |              |
| 0 - 4                      | 9.4 (5.5)        | 2,30        | 2.9 (1.6)        | 0,8         | 5.0 (2.6)        | 0,14         | 4.1 (3.5)        | 1,14         | 4.5 (4.0)        | 0,33         |
| 5 - 9                      | 8.4 (5.0)        | 2,43        | 3.5 (1.8)        | 0,8         | 3.9 (3.3)        | 0,17         | 3.4 (2.1)        | 0,25         | 3.9 (3.3)        | 0,31         |
| 10 - 14                    | 9.5 (6.0)        | 1,29        | 3.2 (1.6)        | 0,12        | 3.9 (2.2)        | 0,9          | 4.0 (2.4)        | 0,14         | 4.8 (4.3)        | 0,39         |
| 15 - 19                    | 10.4 (10.0)      | 1,50        | 3.2 (2.0)        | 0,8         | 4.4 (3.2)        | 0,20         | 3.2 (2.1)        | 0,14         | 4.0 (4.1)        | 0,39         |
| 20 - 24                    | 6.1 (3.6)        | 1,35        | 2.0 (2.2)        | 0,16        | 3.3 (2.7)        | 0,20         | 4.6 (8.1)        | 0,27         | 3.8 (7.0)        | 0,84         |
| 25 - 34                    | 9.8 (7.0)        | 1,58        | 1.7 (1.8)        | 0,13        | 3.0 (3.2)        | 0,18         | 3.0 (3.4)        | 0,34         | 3.7 (6.0)        | 0,36         |
| 35 - 44                    | 9.6 (5.8)        | 1,38        | 2.1 (2.0)        | 0,11        | 3.3 (2.8)        | 0,33         | 3.6 (4.1)        | 0,18         | 2.2 (3.5)        | 0,42         |
| 45 - 54                    | 13.1 (8.9)       | 1,55        | 1.8 (1.5)        | 0,9         | 3.4 (8.2)        | 0,102        | 4.4 (5.4)        | 0,36         | 2.9 (5.9)        | 0,100        |
| 55 - 64                    | 7.4 (4.8)        | 1,25        | 1.8 (1.5)        | 0,12        | 3.3 (4.0)        | 0,42         | 3.0 (4.1)        | 0,46         | 3.2 (3.7)        | 0,39         |
| 65 - 69                    | 7.0 (3.6)        | 1,40        | 1.6 (1.7)        | 0,11        | 3.4 (6.6)        | 0,93         | 3.6 (7.0)        | 0,101        | 2.8 (3.6)        | 0,43         |
| 70 - 74                    | 6.0 (4.6)        | 1,20        | 1.1 (1.4)        | 0,8         | 2.6 (3.1)        | 0,25         | 2.8 (2.1)        | 0,11         | 2.2 (2.0)        | 0,16         |
| 75 - 79                    | 5.0 (4.0)        | 1,14        | 1.5 (1.0)        | 0,5         | 2.6 (1.7)        | 0,9          | 2.8 (4.1)        | 0,32         | 1.9 (1.7)        | 0,8          |
| 80 +                       | 4.2 (2.0)        | 2,8         | 0.7 (1.0)        | 0,3         | 0.7 (1.9)        | 0,9          | 0.2 (0.6)        | 0,4          | 0.5 (1.0)        | 0,4          |
| <b>Sex of participants</b> |                  |             |                  |             |                  |              |                  |              |                  |              |
| Female                     | 8.3 (5.9)        | 1,45        | 2 (1.9)          | 0,16        | 3.4 (5.5)        | 0,102        | 3.6 (4.6)        | 0,46         | 3.4 (5.4)        | 0,100        |
| Male                       | 8.6 (7.2)        | 1,58        | 2 (1.8)          | 0,12        | 3.2 (3.7)        | 0,93         | 3.0 (3.7)        | 0,101        | 2.8 (3.8)        | 0,84         |
| <b>Household size</b>      |                  |             |                  |             |                  |              |                  |              |                  |              |
| 1                          | 4.9 (5.4)        | 1,58        | 0.7 (1.3)        | 0,12        | 1.6 (2.4)        | 0,42         | 1.5 (2.2)        | 0,42         | 2.1 (6.2)        | 0,100        |
| 2                          | 5.8 (4.5)        | 1,55        | 1.3 (1.5)        | 0,11        | 3.3 (7.6)        | 0,101        | 3.2 (5.0)        | 0,101        | 2.4 (4.1)        | 0,84         |
| 3                          | 7.5 (5.1)        | 1,42        | 2.0 (1.4)        | 0,11        | 3.3 (3.5)        | 0,102        | 3.5 (4.7)        | 0,46         | 3.1 (4.9)        | 0,43         |
| 4 or more                  | 10.8 (7.2)       | 1,50        | 3.4 (1.8)        | 0,16        | 4.1 (2.9)        | 0,32         | 4.5 (3.6)        | 0,34         | 4.3 (3.8)        | 0,39         |
| <b>Weekdays</b>            |                  |             |                  |             |                  |              |                  |              |                  |              |
| Monday                     | 7.0 (4.3)        | 1,31        | 2.6 (1.7)        | 0,6         | 3.6 (3.2)        | 0,24         | 3.3 (3.7)        | 0,42         | 3.5 (5.0)        | 0,84         |
| Tuesday                    | 9.0 (8.0)        | 1,56        | 2.8 (2.4)        | 0,8         | 4.1 (5.2)        | 0,102        | 5.5 (6.0)        | 0,32         | 4.1 (5.3)        | 0,43         |
| Wednesday                  | 7.6 (8.3)        | 1,58        | 3.3 (3.2)        | 0,13        | 3.0 (3.5)        | 0,42         | 3.1 (3.6)        | 0,31         | 2.8 (3.3)        | 0,39         |
| Thursday                   | 7.3 (3.2)        | 1,30        | 1.9 (1.8)        | 0,16        | 3.2 (3.8)        | 0,93         | 3.5 (4.8)        | 0,101        | 2.8 (4.4)        | 0,36         |
| Friday                     | 6.1 (5.2)        | 1,55        | 2.1 (2.1)        | 0,8         | 4.4 (3.9)        | 0,32         | 3.6 (5.3)        | 0,27         | 3.0 (7.3)        | 0,100        |
| Saturday                   | 9.5 (6.2)        | 1,50        | 1.8 (1.4)        | 0,8         | 4.0 (9.8)        | 0,101        | 2.8 (2.5)        | 0,33         | 3.6 (5.1)        | 0,35         |
| Sunday                     | 14.4 (9.7)       | 1,45        | 1.9 (1.5)        | 0,12        | 2.5 (2.6)        | 0,21         | 2.3 (2.5)        | 0,34         | 2.2 (2.8)        | 0,43         |

3.2.b. Table 3.2.b Number of recorded overall contacts per different settings in the COVIMOD survey Waves 1 to 4 and the POLYMOD survey for the weighted analysis without group contacts.

**Note:** *The displayed educational contacts are based on the group of participants who attended an educational facility (kindergarten, school, university) and work contacts are based on the group of participants who reported to work full-/part-time*

|             | POLYMOD   |          | COVIMOD   |          |           |          |           |          |           |          |
|-------------|-----------|----------|-----------|----------|-----------|----------|-----------|----------|-----------|----------|
|             |           |          | Wave 1    |          | Wave 2    |          | Wave 3    |          | Wave 4    |          |
|             | Mean (SD) | Min, Max | Mean (SD) | Min, Max | Mean (SD) | Min, Max | Mean (SD) | Min, Max | Mean (SD) | Min, Max |
| Overall     | 8.4 (6.7) | 1,58     | 2.0 (1.9) | 0,16     | 3.3 (4.7) | 0,102    | 3.3 (4.2) | 0,101    | 3.1 (4.7) | 0,100    |
| Home        | 3.3 (2.3) | 0,26     | 1.6 (1.5) | 0,12     | 1.8 (1.7) | 0, 9     | 1.6 (1.5) | 0, 13    | 1.6 (1.6) | 0, 23    |
| Educational | 1.8 (3.8) | 0,42     | 0.0 (0.2) | 0, 3     | 0.2 (0.9) | 0, 10    | 0.1 (0.9) | 0, 17    | 0.4 (1.8) | 0, 22    |
| Work        | 2.8 (4.3) | 0,56     | 0.2 (0.9) | 0,11     | 1.5 (6.1) | 0,100    | 1.8 (5.0) | 0, 97    | 1.4 (5.1) | 0,100    |
| Transport   | 0.6 (1.7) | 0, 8     | 0.0 (0.2) | 0, 3     | 0.1 (0.4) | 0, 4     | 0.0 (0.2) | 0, 8     | 0.1 (0.5) | 0, 12    |
| Others      | 3.4 (4.6) | 0,45     | 0.4 (1.0) | 0,10     | 0.9 (1.8) | 0, 33    | 1.0 (2.2) | 0, 35    | 0.9 (2.1) | 0, 38    |

### 3.3. Comparison of the relative reduction in transmission dynamics

3.3.a. Table 3.3a Comparison of the relative reduction in transmission dynamics based on different input. Given are the mean and bootstrapped 95% confidence interval of the relative percentage mean reduction of the R estimates from the RKI compared to the basic reproduction number and the relative reduction in the number of social contacts from COVIMOD compared to estimates from POLYMOD as well as of mobility estimates compared to pre-pandemic mobility for the weighted analysis without group contact.

|                                            | COVIMOD              | R (RKI)             | Google                | Apple                 |
|--------------------------------------------|----------------------|---------------------|-----------------------|-----------------------|
| Relative Mean Percentage Reduction (95%CI) |                      |                     |                       |                       |
| <b>Overall</b>                             |                      |                     |                       |                       |
| 30th April - 6th May 2020                  | 75.81 (70.72,80.90)  | 67.00 (69.00,64.00) | 24.31 (36.37,17.66)   | 36.77 (41.31, 32.79)  |
| 14th May - 21st May 2020                   | 60.72 (50.99,70.01)  | 66.00 (69.00,62.00) | 16.85 (26.87, 9.80)   | 15.65 (19.90, 10.67)  |
| 28th May - 4th June 2020                   | 60.33 (49.98,69.69)  | 60.00 (64.00,55.00) | 13.05 (23.80, 5.65)   | -5.18 (-0.74,-10.19)  |
| 11th June - 22nd June 2020                 | 62.53 (53.76,70.48)  | 68.00 (71.00,65.00) | 10.63 (16.25, 6.28)   | -11.65 (-8.31,-15.99) |
| <b>Home</b>                                |                      |                     |                       |                       |
| 30th April - 6th May 2020                  | 52.76 (44.30,59.42)  | -                   | -12.71 (-9.14,-18.42) | -                     |
| 14th May - 21st May 2020                   | 46.24 (35.89,55.22)  | -                   | -8.62 (-6.00,-11.62)  | -                     |
| 28th May - 4th June 2020                   | 49.86 (39.57,58.73)  | -                   | -6.88 (-3.88,-10.12)  | -                     |
| 11th June - 22nd June 2020                 | 52.46 (44.23,59.82)  | -                   | -5.25 (-3.17, -7.91)  | -                     |
| <b>Educational</b>                         |                      |                     |                       |                       |
| 30th April - 6th May 2020                  | 98.08 (94.29,99.82)  | -                   | -                     | -                     |
| 14th May - 21st May 2020                   | 86.86 (68.66,96.68)  | -                   | -                     | -                     |
| 28th May - 4th June 2020                   | 93.44 (79.60,99.08)  | -                   | -                     | -                     |
| 11th June - 22nd June 2020                 | 73.13 (40.84,89.58)  | -                   | -                     | -                     |
| <b>Work</b>                                |                      |                     |                       |                       |
| 30th April - 6th May 2020                  | 91.29 ( 84.71,95.54) | -                   | 34.71 (52.42,23.58)   | -                     |
| 14th May - 21st May 2020                   | 46.90 ( 11.32,70.40) | -                   | 27.00 (45.10,13.87)   | -                     |
| 28th May - 4th June 2020                   | 34.78 (-15.03,70.20) | -                   | 24.12 (42.00, 9.00)   | -                     |
| 11th June - 22nd June 2020                 | 50.74 ( 16.82,71.91) | -                   | 16.50 (28.50, 5.17)   | -                     |
| <b>Transport</b>                           |                      |                     |                       |                       |
| 30th April - 6th May 2020                  | 91.43 (76.30,97.84)  | -                   | 42.14 (50.85,36.86)   | -                     |
| 14th May - 21st May 2020                   | 75.61 (25.49,94.44)  | -                   | 31.75 (36.38,27.88)   | -                     |
| 28th May - 4th June 2020                   | 91.45 (74.81,98.10)  | -                   | 25.12 (31.12,19.63)   | -                     |
| 11th June - 22nd June 2020                 | 72.83 (20.80,93.26)  | -                   | 23.00 (27.00,19.67)   | -                     |
| <b>Others</b>                              |                      |                     |                       |                       |
| 30th April - 6th May 2020                  | 86.65 (79.68,91.55)  | -                   | 28.71 (49.35,16.14)   | -                     |
| 14th May - 21st May 2020                   | 71.42 (57.99,81.92)  | -                   | 17.06 (34.31, 3.94)   | -                     |
| 28th May - 4th June 2020                   | 69.46 (52.03,82.54)  | -                   | 11.44 (27.37, 0.32)   | -                     |
| 11th June - 22nd June 2020                 | 71.83 (58.62,81.48)  | -                   | 9.46 (17.50, 3.09)    | -                     |

3.3.b. Table 3.3b Effective reproduction number at the timing of COVIMOD survey Waves 1 to 4, estimated effective reproduction number based on the reduction of social contacts at the times of COVIMOD survey Waves 1 to 4 assuming values of the basic reproduction number of Norm (2.6, SD=0.54) and the reduction in mobility at the times of the COVIMOD survey Waves, with 10000 bootstrapped samples in various settings and in different time frames for the weighted analysis without group contacts.

|                            | COVIMOD                          |                                       | R (RKI)                          |                                       |
|----------------------------|----------------------------------|---------------------------------------|----------------------------------|---------------------------------------|
|                            | Mean reproduction number (95%CI) | Percent Mean Reduction Number (95%CI) | Mean reproduction number (95%CI) | Percent Mean Reduction Number (95%CI) |
| <b>Overall</b>             |                                  |                                       |                                  |                                       |
| 30th April - 6th May 2020  | 0.57 (0.31,0.89)                 | 79.00 (89.00,66.00)                   | 0.88 (0.82,0.94)                 | 67.00 (69.00,64.00)                   |
| 14th May - 21st May 2020   | 0.83 (0.45,1.28)                 | 69.00 (83.00,51.00)                   | 0.91 (0.81,1.00)                 | 66.00 (69.00,62.00)                   |
| 28th May - 4th June 2020   | 0.88 (0.46,1.43)                 | 67.00 (83.00,46.00)                   | 1.06 (0.94,1.19)                 | 60.00 (64.00,55.00)                   |
| 11th June - 22nd June 2020 | 0.81 (0.45,1.25)                 | 69.00 (83.00,52.00)                   | 0.84 (0.76,0.91)                 | 68.00 (71.00,65.00)                   |
| <b>Home</b>                |                                  |                                       |                                  |                                       |
| 30th April - 6th May 2020  | 1.40 (0.82,2.01)                 | 47.00 (69.00,23.00)                   | -                                | -                                     |
| 14th May - 21st May 2020   | 1.38 (0.80,2.00)                 | 47.00 (70.00,24.00)                   | -                                | -                                     |
| 28th May - 4th June 2020   | 1.45 (0.83,2.13)                 | 45.00 (69.00,19.00)                   | -                                | -                                     |
| 11th June - 22nd June 2020 | 1.27 (0.75,1.84)                 | 52.00 (72.00,30.00)                   | -                                | -                                     |
| <b>Educational</b>         |                                  |                                       |                                  |                                       |
| 30th April - 6th May 2020  | 0.05 (0.01,0.16)                 | 99.00 (100.00,94.00)                  | -                                | -                                     |
| 14th May - 21st May 2020   | 0.26 (0.04,0.92)                 | 90.00 (99.00,65.00)                   | -                                | -                                     |
| 28th May - 4th June 2020   | 0.15 (0.03,0.49)                 | 95.00 (99.00,82.00)                   | -                                | -                                     |
| 11th June - 22nd June 2020 | 0.62 (0.15,1.90)                 | 77.00 (95.00,27.00)                   | -                                | -                                     |
| <b>Work</b>                |                                  |                                       |                                  |                                       |
| 30th April - 6th May 2020  | 0.24 (0.09,0.53)                 | 91.00 (97.00, 80.00)                  | -                                | -                                     |
| 14th May - 21st May 2020   | 0.82 (0.36,1.62)                 | 69.00 (87.00, 38.00)                  | -                                | -                                     |
| 28th May - 4th June 2020   | 1.22 (0.36,2.87)                 | 54.00 (87.00,-10.00)                  | -                                | -                                     |
| 11th June - 22nd June 2020 | 0.80 (0.34,1.60)                 | 70.00 (87.00, 39.00)                  | -                                | -                                     |
| <b>Transport</b>           |                                  |                                       |                                  |                                       |

|                            | COVIMOD                          |                                       | R (RKI)                          |                                       |
|----------------------------|----------------------------------|---------------------------------------|----------------------------------|---------------------------------------|
|                            | Mean reproduction number (95%CI) | Percent Mean Reduction Number (95%CI) | Mean reproduction number (95%CI) | Percent Mean Reduction Number (95%CI) |
| 30th April - 6th May 2020  | 0.80 (0.12,2.97)                 | 70.00 (96.00, -14.00)                 | -                                | -                                     |
| 14th May - 21st May 2020   | 1.13 (0.16,4.27)                 | 57.00 (94.00, -64.00)                 | -                                | -                                     |
| 28th May - 4th June 2020   | 0.73 (0.12,2.69)                 | 72.00 (96.00, -3.00)                  | -                                | -                                     |
| 11th June - 22nd June 2020 | 1.46 (0.18,6.43)                 | 44.00 (94.00,-147.00)                 | -                                | -                                     |
| <b>Others</b>              |                                  |                                       |                                  |                                       |
| 30th April - 6th May 2020  | 0.29 (0.13,0.56)                 | 89.00 (95.00,79.00)                   | -                                | -                                     |
| 14th May - 21st May 2020   | 0.59 (0.27,1.09)                 | 78.00 (90.00,59.00)                   | -                                | -                                     |
| 28th May - 4th June 2020   | 0.73 (0.30,1.48)                 | 72.00 (89.00,44.00)                   | -                                | -                                     |
| 11th June - 22nd June 2020 | 0.59 (0.27,1.10)                 | 78.00 (90.00,58.00)                   | -                                | -                                     |

### 3.4. Boxplots of the number of overall contacts in various settings

Boxes represent the 25<sup>th</sup>, 50<sup>th</sup> and 75<sup>th</sup> percentiles, the whiskers represent the 10<sup>th</sup> and 90<sup>th</sup> percentile and the white dots represent the mean. Participants with no contacts are displayed as 0 on the log-scale of the y-axis.

3.4.a. Figure 3.4a Displayed are the number of social contacts by setting: (a) the overall number of contacts, (b) home contacts, (c) educational contacts, (d) work contacts, (e) public transport contacts and (f) other contacts for the weighted analysis without group contacts in overall contacts.

**Note:** The displayed educational contacts are based on the group of participants who attended an educational facility (kindergarten, school, university) and work contacts are based on the group of participants who reported to work full-/part-time

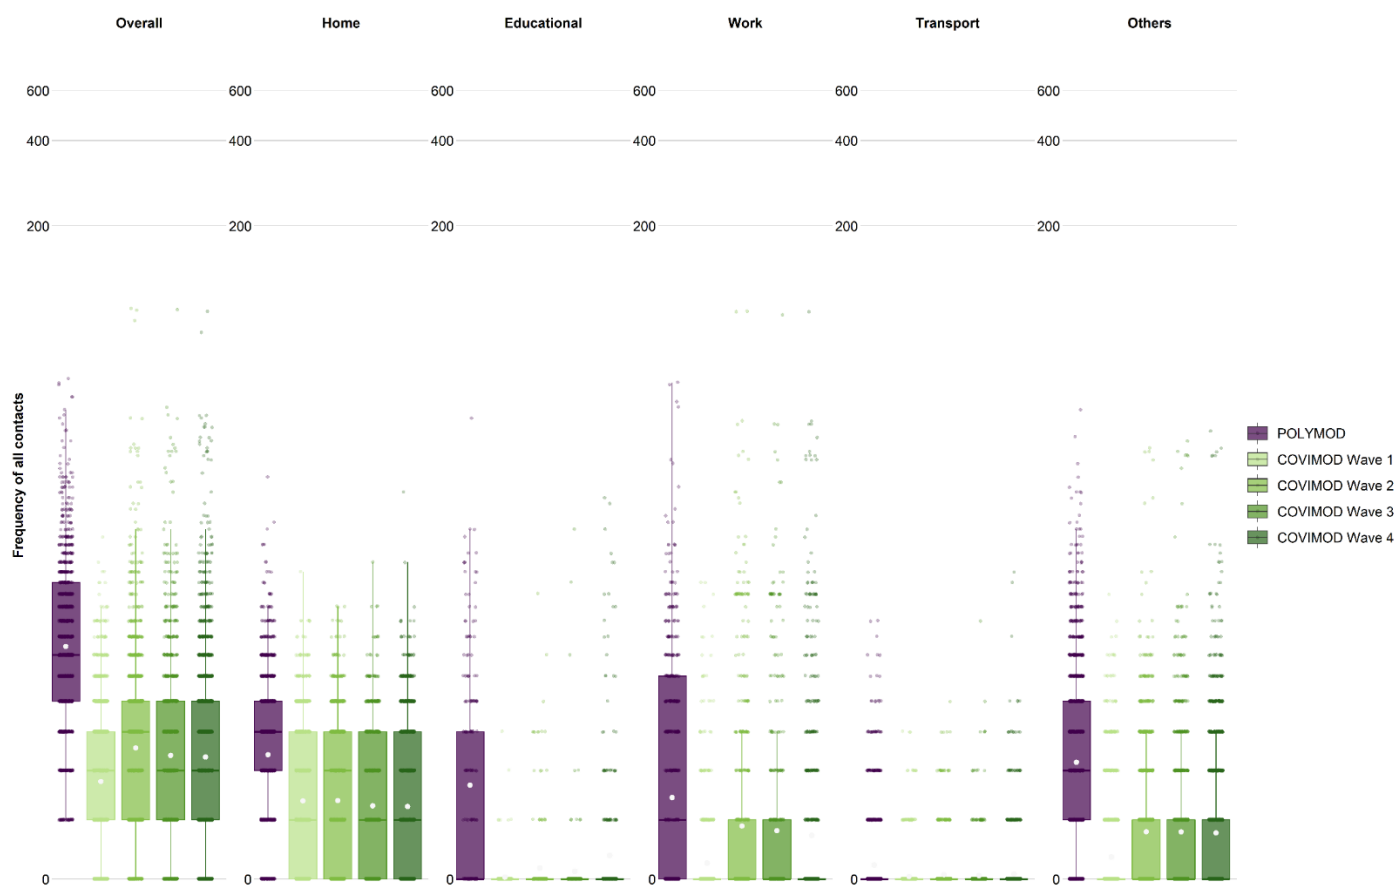

3.4.b. Figure 3.4b Displayed are the number of social contacts stratified by age group: (a) 0 - 7 years, (b) 8 – 15 years, (c) 16 – 23 years, (d) 24 – 38 years, (e) 39 – 60 years and (f) 61 years or more for the weighted analysis without group contacts in overall contacts.

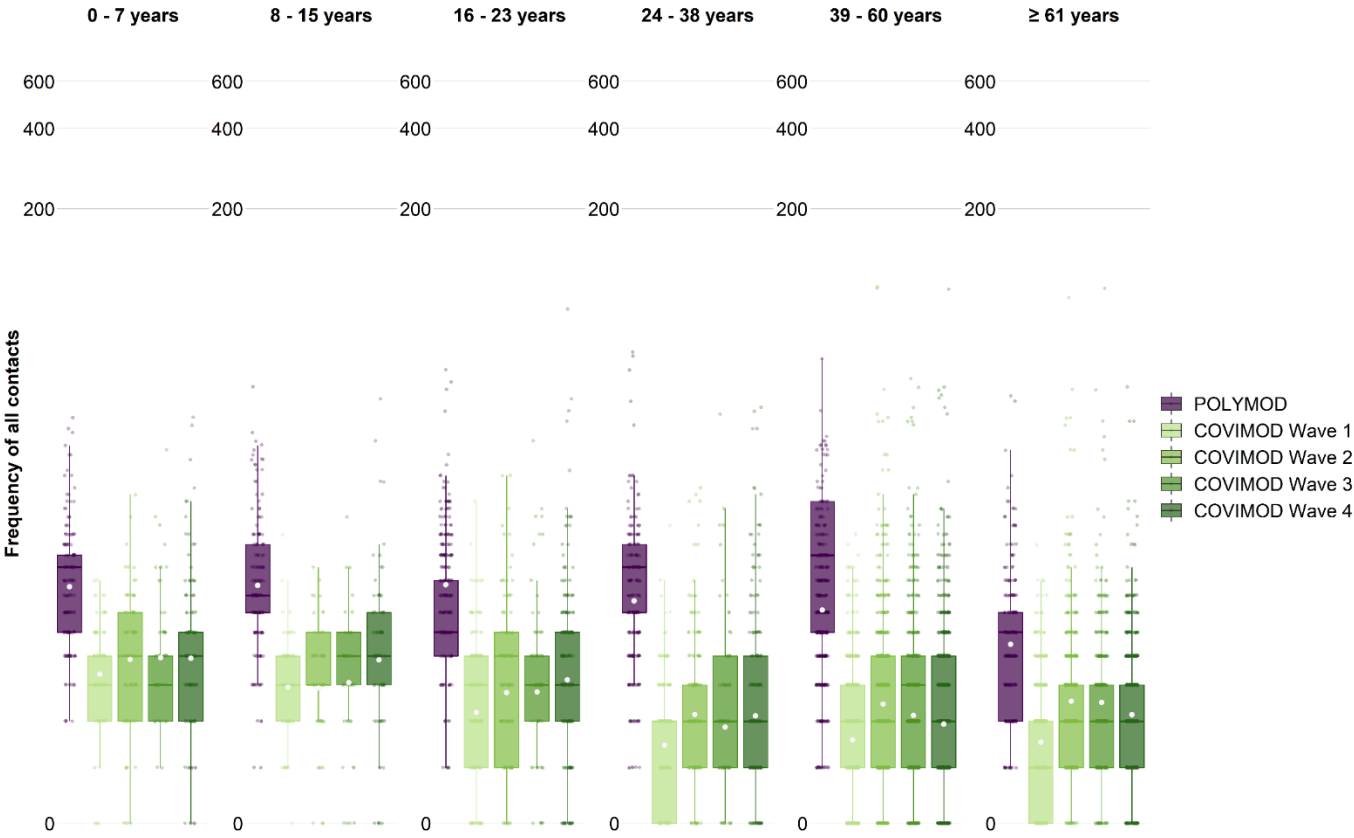

3.4.c. Figure 3.4c Displayed are the number of social contacts stratified by household size: (a) Household size of 1, (b) Household size of 2, (c) Household size of 3 and (d) Household size of 4 or more for the weighted analysis without group contacts in overall contacts.

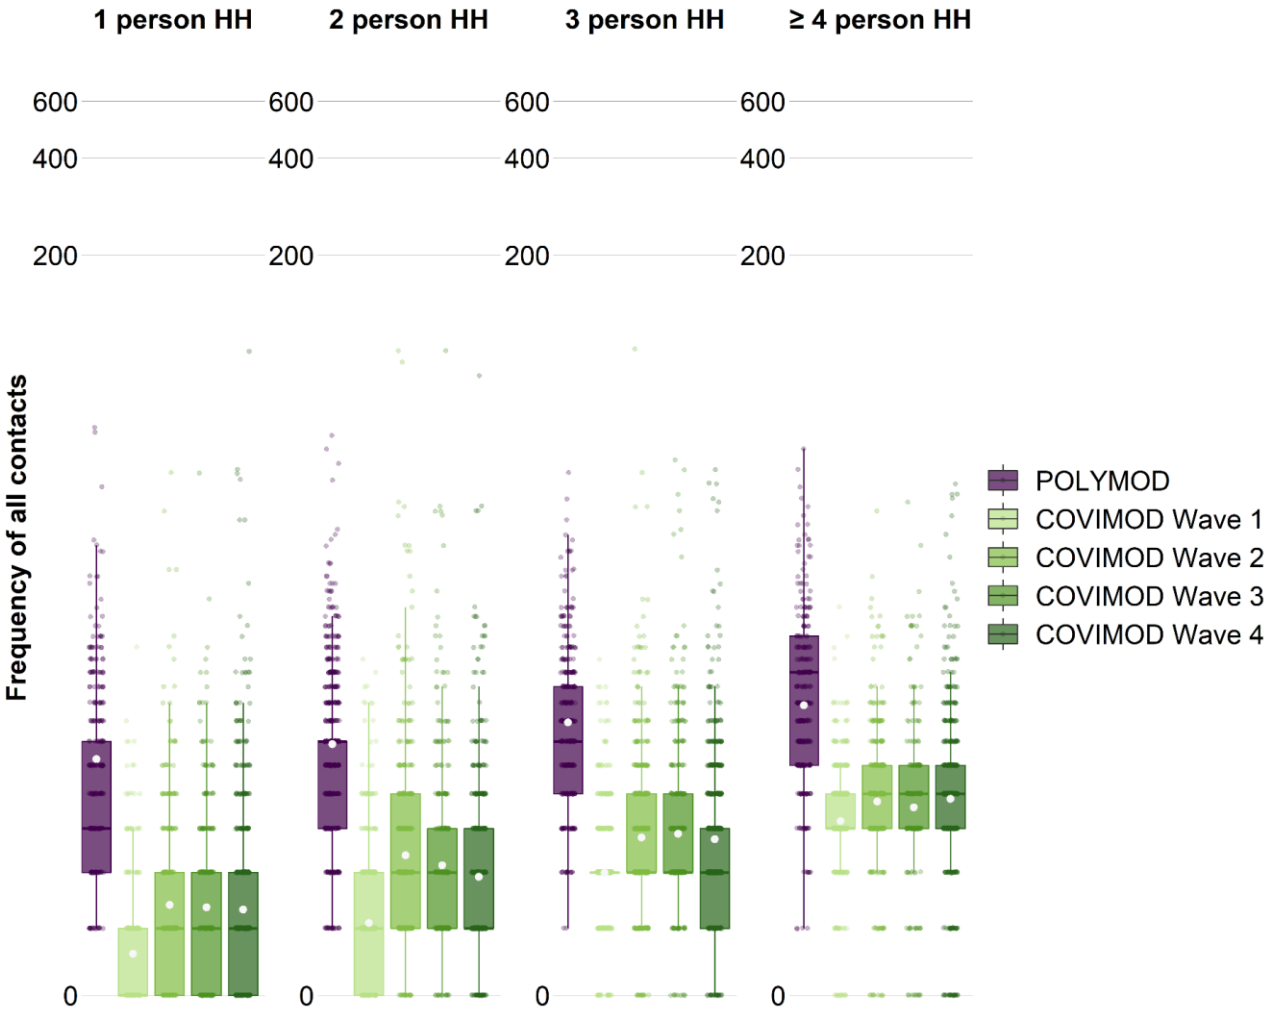



3.4.d. Figure 3.4d Displayed are the number of social contacts stratified by sex (a) Female and (b) Male for the weighted analysis without group contacts in overall contacts.

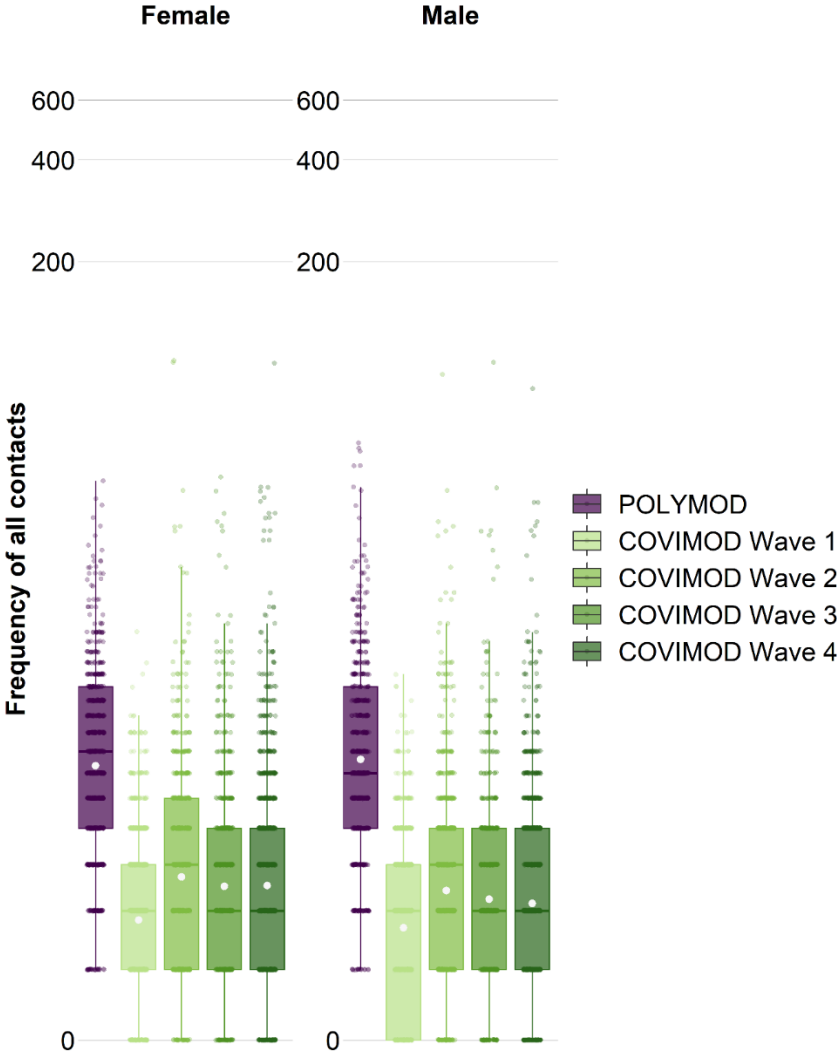

3.4.e. Figure 3.4e Displayed are the number of social contacts stratified by day of the week (a) Monday, (b) Tuesday, (c) Wednesday, (d) Thursday, (e) Friday, (f) Saturday and (g) Sunday for the weighted analysis without group contacts in overall contacts.

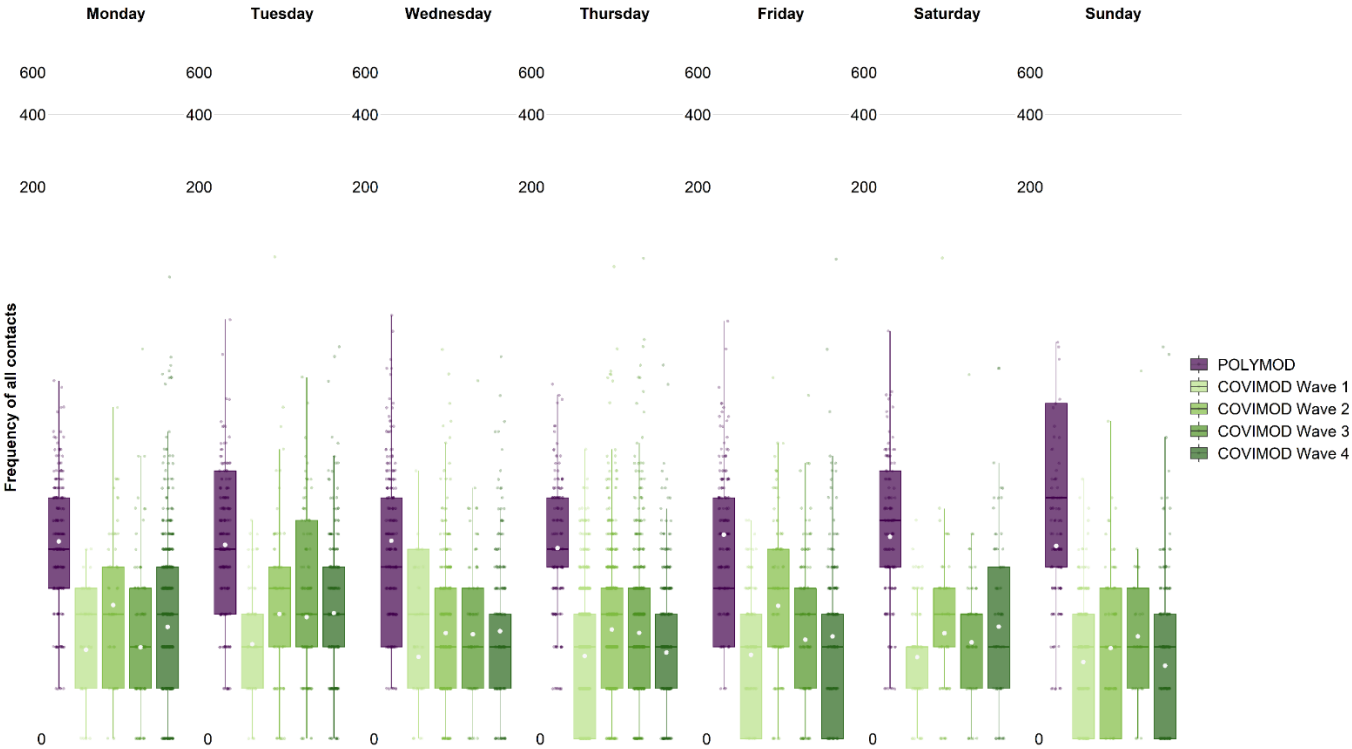

### 3.5. Social contact patterns

3.5. Figure 3.5 Social contact matrices with the mean total number of reported daily social contacts by participants in different age groups with individuals in other age groups in POLYMOD and COVIMOD survey waves 1 to 4 in various settings. Displayed are (a) the overall number of contacts, (b) home contacts, (c) educational contacts, (d) work contacts, (e) public transport contacts and (f) other contacts for the weighted analysis without group contacts.

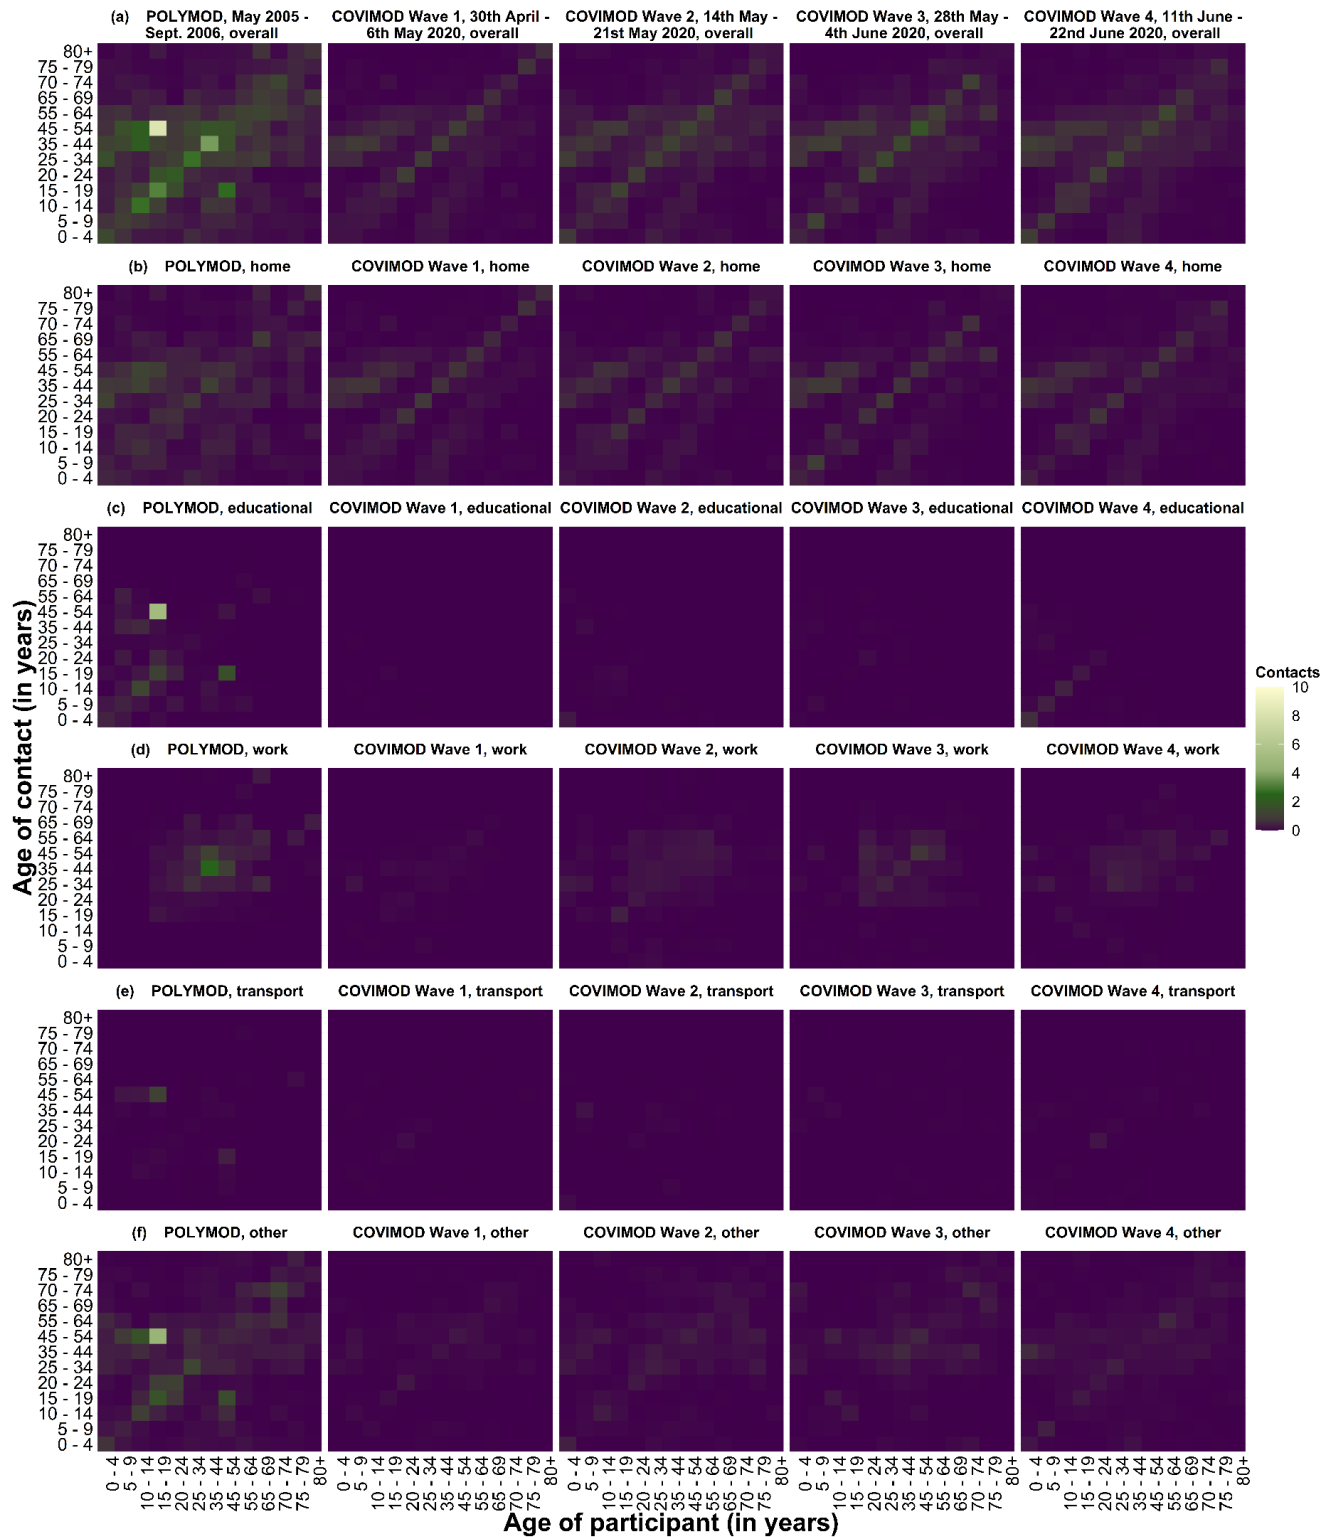

### 3.6. Relative reductions in transmission dynamics of SARS-CoV-2

3.6.a. Figure 3.6a Comparison of the relative reduction in transmission dynamics based on different input data.

Displayed are the mean and bootstrapped 95% confidence interval of the relative reduction of the R estimates from the RKI compared to the basic reproduction number and the relative reduction in the number of social contacts (COVIMOD-simple approach) as well as of mobility estimates compared to pre-pandemic times (A) displays the overall relative reduction and (B) displays the relative reduction by setting for the weighted analysis without group contacts.

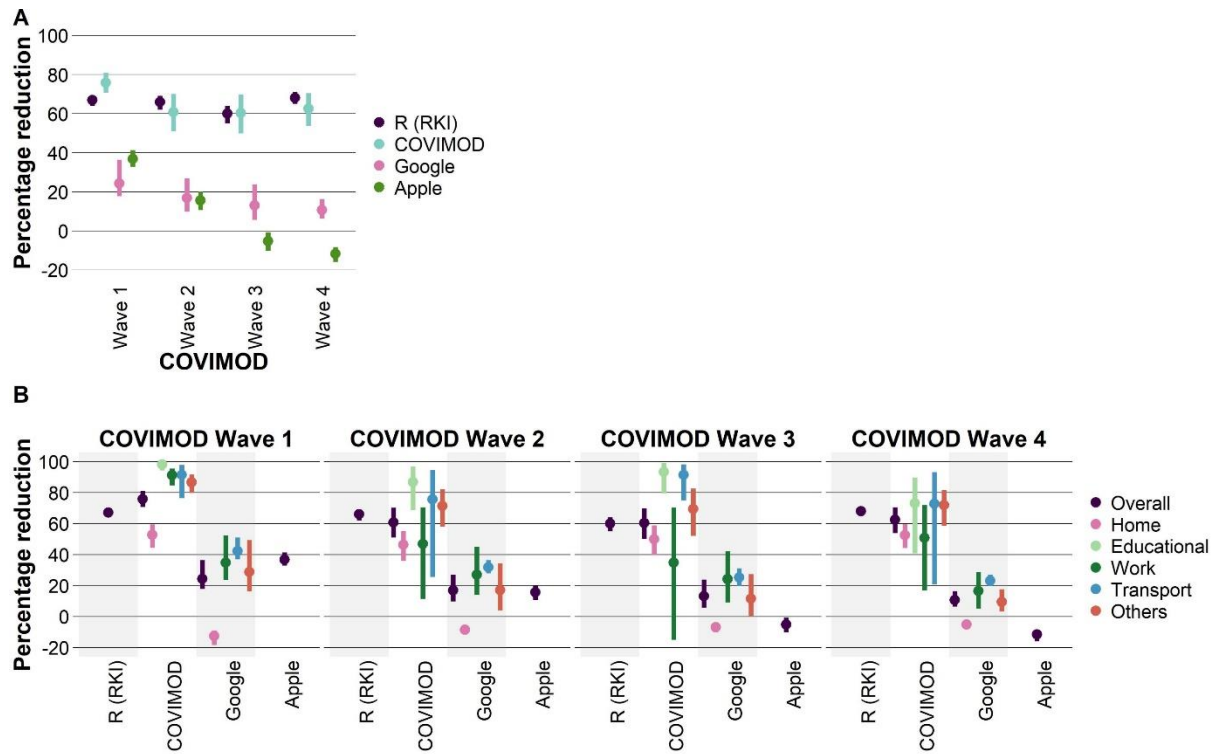

3.6.b. Figure 3.6b Comparison of the percentage reduction in transmission dynamics based on different input data.

Displayed are the mean and bootstrapped 95% confidence interval of the percentage reduction of the R estimates from the RKI and R estimates obtained from COVIMOD (complex approach) compared to the basic reproduction number and the percentage reduction of Google and Apple mobility data (A) displays the overall percentage reduction and (B) displays the percentage reduction by setting for the weighted analysis without group contacts.

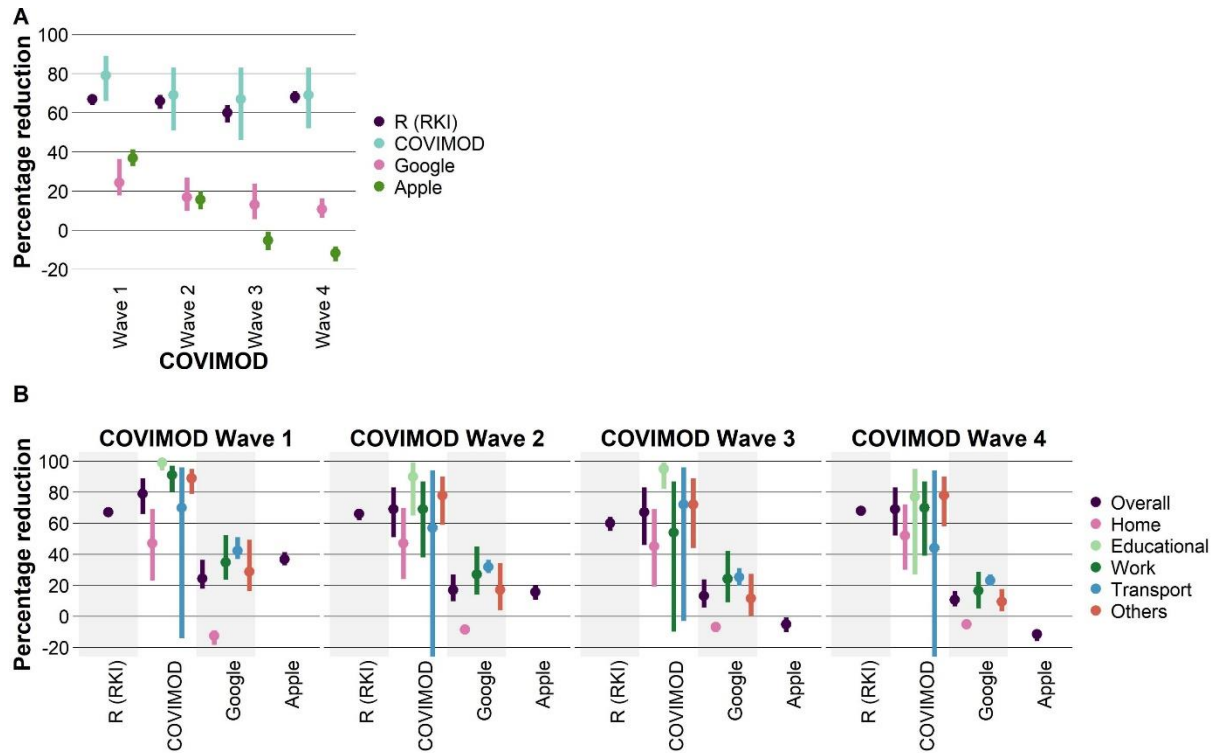

#### 4. UNWEIGHTED ANALYSIS WITHOUT GROUP CONTACTS

##### 4.2. Number of social contacts

4.2.a. Table 4.2a Number of recorded overall contacts per participant per day stratified by age, gender, household size, and day of the week in the COVIMOD survey Waves 1 to 4 and the POLYMOD survey for the unweighted analysis without group contacts.

|                            | POLYMOD     |                  |             | COVIMOD     |                  |             |             |                  |              |             |                  |              |             |                  |              |
|----------------------------|-------------|------------------|-------------|-------------|------------------|-------------|-------------|------------------|--------------|-------------|------------------|--------------|-------------|------------------|--------------|
|                            |             |                  |             | Wave 1      |                  |             | Wave 2      |                  |              | Wave 3      |                  |              | Wave 4      |                  |              |
|                            | N           | Mean (SD)        | Min, Max    | N           | Mean (SD)        | Min, Max    | N           | Mean (SD)        | Min, Max     | N           | Mean (SD)        | Min, Max     | N           | Mean (SD)        | Min, Max     |
|                            | <b>1341</b> | <b>7.9 (6.3)</b> | <b>1,58</b> | <b>1560</b> | <b>2.1 (1.9)</b> | <b>0,16</b> | <b>1356</b> | <b>3.6 (6.1)</b> | <b>0,102</b> | <b>1081</b> | <b>3.4 (5.4)</b> | <b>0,101</b> | <b>1890</b> | <b>3.3 (5.3)</b> | <b>0,100</b> |
| <b>Age category</b>        |             |                  |             |             |                  |             |             |                  |              |             |                  |              |             |                  |              |
| 0 - 4                      | 89          | 9.1 (6.1)        | 2,30        | 46          | 3.8 (1.9)        | 0,8         | 36          | 4.7 (2.7)        | 0,14         | 21          | 5.0 (3.7)        | 1,14         | 56          | 4.7 (5.3)        | 0,33         |
| 5 - 9                      | 92          | 8.4 (5.7)        | 2,43        | 48          | 3.5 (1.7)        | 0,8         | 41          | 4.4 (3.2)        | 0,17         | 30          | 4.8 (4.6)        | 0,25         | 62          | 5.5 (5.1)        | 0,31         |
| 10 - 14                    | 110         | 9.0 (5.7)        | 1,29        | 73          | 3.2 (1.8)        | 0,12        | 63          | 3.3 (2.0)        | 0,9          | 45          | 3.6 (2.6)        | 0,14         | 87          | 5.1 (5.5)        | 0,39         |
| 15 - 19                    | 121         | 10.0 (7.6)       | 1,50        | 95          | 3.3 (2.0)        | 0,8         | 66          | 4.1 (3.7)        | 0,20         | 45          | 3.7 (3.1)        | 0,14         | 108         | 4.6 (5.4)        | 0,39         |
| 20 - 24                    | 117         | 7.9 (4.9)        | 1,35        | 83          | 2.0 (2.6)        | 0,16        | 60          | 3.0 (3.3)        | 0,20         | 28          | 4.1 (6.0)        | 0,27         | 109         | 4.6 (8.9)        | 0,84         |
| 25 - 34                    | 132         | 9.0 (8.5)        | 1,58        | 173         | 1.7 (1.8)        | 0,13        | 148         | 2.8 (3.2)        | 0,18         | 96          | 2.7 (4.3)        | 0,34         | 219         | 3.3 (5.3)        | 0,36         |
| 35 - 44                    | 156         | 8.1 (5.4)        | 1,38        | 137         | 1.9 (2.2)        | 0,11        | 124         | 3.0 (3.7)        | 0,33         | 91          | 2.5 (3.0)        | 0,18         | 164         | 2.4 (4.0)        | 0,42         |
| 45 - 54                    | 184         | 7.9 (7.1)        | 1,55        | 235         | 1.8 (1.7)        | 0,9         | 209         | 4.0 (10.3)       | 0,102        | 174         | 2.9 (4.6)        | 0,36         | 275         | 2.9 (7.3)        | 0,100        |
| 55 - 64                    | 160         | 6.0 (3.8)        | 1,25        | 265         | 1.9 (1.7)        | 0,12        | 244         | 3.7 (5.1)        | 0,42         | 237         | 3.6 (5.7)        | 0,46         | 321         | 3.0 (4.2)        | 0,39         |
| 65 - 69                    | 74          | 6.3 (6.6)        | 1,40        | 270         | 1.8 (1.7)        | 0,11        | 245         | 3.9 (7.6)        | 0,93         | 199         | 3.8 (8.3)        | 0,101        | 313         | 3.0 (4.1)        | 0,43         |
| 70 - 74                    | 33          | 5.1 (4.7)        | 1,20        | 89          | 1.8 (1.5)        | 0,8         | 73          | 3.1 (3.5)        | 0,25         | 79          | 3.0 (2.1)        | 0,11         | 118         | 2.4 (2.2)        | 0,16         |
| 75 - 79                    | 14          | 4.6 (3.7)        | 1,14        | 35          | 1.7 (1.4)        | 0,5         | 34          | 2.6 (2.1)        | 0,9          | 29          | 3.7 (5.9)        | 0,32         | 48          | 2.8 (2.1)        | 0,8          |
| 80 +                       | 13          | 3.7 (1.8)        | 2,8         | 11          | 1.1 (1.0)        | 0,3         | 11          | 2.0 (2.8)        | 0,9          | 7           | 1.7 (1.5)        | 0,4          | 10          | 1.5 (1.7)        | 0,4          |
| <b>Sex of participants</b> |             |                  |             |             |                  |             |             |                  |              |             |                  |              |             |                  |              |
| Female                     | 722         | 7.7 (5.5)        | 1,45        | 748         | 2.2 (2.0)        | 0,16        | 638         | 3.9 (6.8)        | 0,102        | 536         | 3.6 (5.0)        | 0,46         | 901         | 3.7 (6.0)        | 0,100        |
| Male                       | 581         | 8.3 (7.2)        | 1,58        | 806         | 2.0 (1.8)        | 0,12        | 717         | 3.3 (5.3)        | 0,93         | 544         | 3.2 (5.9)        | 0,101        | 985         | 3.0 (4.6)        | 0,84         |
| <b>Household size</b>      |             |                  |             |             |                  |             |             |                  |              |             |                  |              |             |                  |              |
| 1                          | 250         | 6.8 (6.8)        | 1,58        | 232         | 0.8 (1.5)        | 0,12        | 256         | 2.1 (4.2)        | 0,42         | 268         | 1.9 (3.4)        | 0,42         | 487         | 2.2 (6.2)        | 0,100        |
| 2                          | 411         | 7.3 (6.2)        | 1,55        | 412         | 1.3 (1.6)        | 0,11        | 351         | 3.8 (8.4)        | 0,101        | 270         | 3.4 (7.6)        | 0,101        | 439         | 2.8 (5.4)        | 0,84         |

|                 | POLYMOD     |                  |             | COVIMOD     |                  |             |             |                  |              |             |                  |              |             |                  |              |
|-----------------|-------------|------------------|-------------|-------------|------------------|-------------|-------------|------------------|--------------|-------------|------------------|--------------|-------------|------------------|--------------|
|                 |             |                  |             | Wave 1      |                  |             | Wave 2      |                  |              | Wave 3      |                  |              | Wave 4      |                  |              |
|                 | N           | Mean (SD)        | Min, Max    | N           | Mean (SD)        | Min, Max    | N           | Mean (SD)        | Min, Max     | N           | Mean (SD)        | Min, Max     | N           | Mean (SD)        | Min, Max     |
|                 | <b>1341</b> | <b>7.9 (6.3)</b> | <b>1,58</b> | <b>1560</b> | <b>2.1 (1.9)</b> | <b>0,16</b> | <b>1356</b> | <b>3.6 (6.1)</b> | <b>0,102</b> | <b>1081</b> | <b>3.4 (5.4)</b> | <b>0,101</b> | <b>1890</b> | <b>3.3 (5.3)</b> | <b>0,100</b> |
| 3               | 339         | 8.2 (5.4)        | 1,42        | 514         | 2.2 (1.5)        | 0,11        | 447         | 3.6 (6.0)        | 0,102        | 343         | 3.8 (5.1)        | 0,46         | 544         | 3.5 (4.5)        | 0,43         |
| 4 or more       | 341         | 9.3 (6.5)        | 1,50        | 402         | 3.5 (1.9)        | 0,16        | 302         | 4.5 (3.5)        | 0,32         | 200         | 4.5 (4.1)        | 0,34         | 420         | 4.9 (4.8)        | 0,39         |
| <b>Weekdays</b> |             |                  |             |             |                  |             |             |                  |              |             |                  |              |             |                  |              |
| Monday          | 227         | 7.6 (4.9)        | 1,31        | 50          | 2.2 (1.7)        | 0,6         | 60          | 4.3 (4.1)        | 0,24         | 128         | 2.7 (4.3)        | 0,42         | 642         | 3.6 (5.5)        | 0,84         |
| Tuesday         | 237         | 7.7 (5.9)        | 1,56        | 63          | 2.4 (2.0)        | 0,8         | 89          | 5.0 (11.2)       | 0,102        | 143         | 4.0 (4.6)        | 0,32         | 246         | 4.1 (4.9)        | 0,43         |
| Wednesday       | 222         | 8.5 (7.7)        | 1,58        | 54          | 2.3 (2.5)        | 0,13        | 293         | 3.3 (4.4)        | 0,42         | 87          | 3.1 (3.9)        | 0,31         | 172         | 3.6 (4.9)        | 0,39         |
| Thursday        | 179         | 7.3 (4.9)        | 1,30        | 914         | 2.1 (1.9)        | 0,16        | 613         | 3.4 (5.5)        | 0,93         | 489         | 3.6 (6.6)        | 0,101        | 320         | 2.5 (3.4)        | 0,36         |
| Friday          | 186         | 8.5 (6.7)        | 1,55        | 144         | 2.1 (1.8)        | 0,8         | 117         | 4.4 (4.5)        | 0,32         | 132         | 3.0 (3.5)        | 0,27         | 196         | 3.6 (8.1)        | 0,100        |
| Saturday        | 152         | 8.4 (6.5)        | 1,50        | 88          | 2.0 (1.6)        | 0,8         | 63          | 4.2 (12.6)       | 0,101        | 66          | 2.8 (4.2)        | 0,33         | 81          | 3.9 (5.8)        | 0,35         |
| Sunday          | 117         | 7.9 (7.3)        | 1,45        | 247         | 1.9 (1.9)        | 0,12        | 121         | 2.5 (2.8)        | 0,21         | 36          | 3.2 (5.5)        | 0,34         | 233         | 2.2 (4.4)        | 0,43         |

4.2.b. Table 4.2.b Number of recorded overall contacts per different settings in the COVIMOD survey Waves 1 to 4 and the POLYMOD survey for the unweighted analysis without group contacts.

**Note:** *The displayed educational contacts are based on the group of participants who attended an educational facility (kindergarten, school, university) and work contacts are based on the group of participants who reported to work full-/part-time*

|             | POLYMOD |           |          | COVIMOD |           |          |        |           |          |        |           |          |        |           |          |
|-------------|---------|-----------|----------|---------|-----------|----------|--------|-----------|----------|--------|-----------|----------|--------|-----------|----------|
|             |         |           |          | Wave 1  |           |          | Wave 2 |           |          | Wave 3 |           |          | Wave 4 |           |          |
|             | N       | Mean (SD) | Min, Max | N       | Mean (SD) | Min, Max | N      | Mean (SD) | Min, Max | N      | Mean (SD) | Min, Max | N      | Mean (SD) | Min, Max |
| Overall     | 1341    | 7.9 (6.3) | 1,58     | 1560    | 2.1 (1.9) | 0,16     | 1356   | 3.6 (6.1) | 0,102    | 1081   | 3.4 (5.4) | 0,101    | 1890   | 3.3 (5.3) | 0,100    |
| Home        | 1341    | 2.8 (2.3) | 0,26     | 1560    | 1.6 (1.5) | 0,12     | 1356   | 1.6 (1.6) | 0,9      | 1081   | 1.5 (1.5) | 0,13     | 1890   | 1.5 (1.7) | 0,23     |
| Educational | 199     | 2.8 (4.7) | 0,42     | 310     | 0.0 (0.2) | 0,3      | 247    | 0.2 (1.0) | 0,10     | 179    | 0.2 (1.6) | 0,17     | 385    | 0.7 (2.5) | 0,22     |
| Work        | 715     | 2.4 (5.2) | 0,56     | 690     | 0.4 (1.2) | 0,11     | 613    | 2.0 (7.2) | 0,100    | 476    | 1.8 (6.3) | 0,97     | 809    | 1.6 (5.7) | 0,100    |
| Transport   | 1341    | 0.3 (0.8) | 0,8      | 1560    | 0.0 (0.3) | 0,3      | 1356   | 0.1 (0.4) | 0,4      | 1081   | 0.1 (0.4) | 0,8      | 1890   | 0.1 (0.6) | 0,12     |
| Others      | 1341    | 3.0 (3.8) | 0,45     | 1560    | 0.4 (1.0) | 0,10     | 1356   | 1.1 (2.4) | 0,33     | 1081   | 1.1 (2.9) | 0,35     | 1890   | 1.1 (2.5) | 0,38     |



### 4.3. Comparison of the relative reduction in transmission dynamics

4.3.a. Table 4.3a Comparison of the relative reduction in transmission dynamics based on different input. Given are the mean and bootstrapped 95% confidence interval of the relative mean percentage reduction of the R estimates from the RKI compared to the basic reproduction number and the relative reduction in the number of social contacts from COVIMOD compared to estimates from POLYMOD as well as of mobility estimates compared to pre-pandemic mobility for the unweighted analysis without group contact.

|                                            | COVIMOD              | R (RKI)             | Google                | Apple                 |
|--------------------------------------------|----------------------|---------------------|-----------------------|-----------------------|
| Relative Mean Percentage Reduction (95%CI) |                      |                     |                       |                       |
| <b>Overall</b>                             |                      |                     |                       |                       |
| 30th April - 6th May 2020                  | 73.71 (72.09,75.18)  | 67.00 (69.00,64.00) | 24.31 (36.37,17.66)   | 36.77 (41.31, 32.77)  |
| 14th May - 21st May 2020                   | 55.12 (50.61,59.29)  | 66.00 (69.00,62.00) | 16.85 (26.87, 9.80)   | 15.64 (19.91, 10.65)  |
| 28th May - 4th June 2020                   | 57.56 (52.65,61.83)  | 60.00 (64.00,55.00) | 13.05 (23.80, 5.65)   | -5.18 (-0.74,-10.19)  |
| 11th June - 22nd June 2020                 | 58.18 (54.38,61.53)  | 68.00 (71.00,65.00) | 10.63 (16.25, 6.28)   | -11.66 (-8.32,-15.99) |
| <b>Home</b>                                |                      |                     |                       |                       |
| 30th April - 6th May 2020                  | 43.63 (40.03,47.36)  | -                   | -12.71 (-9.14,-18.42) | -                     |
| 14th May - 21st May 2020                   | 43.41 (39.37,47.27)  | -                   | -8.62 (-6.00,-11.62)  | -                     |
| 28th May - 4th June 2020                   | 47.64 (43.41,51.55)  | -                   | -6.88 (-3.88,-10.12)  | -                     |
| 11th June - 22nd June 2020                 | 46.84 (43.08,50.24)  | -                   | -5.25 (-3.17, -7.91)  | -                     |
| <b>Educational</b>                         |                      |                     |                       |                       |
| 30th April - 6th May 2020                  | 98.67 (97.46,99.53)  | -                   | -                     | -                     |
| 14th May - 21st May 2020                   | 91.20 (85.43,95.35)  | -                   | -                     | -                     |
| 28th May - 4th June 2020                   | 91.36 (81.29,98.28)  | -                   | -                     | -                     |
| 11th June - 22nd June 2020                 | 75.22 (62.76,84.68)  | -                   | -                     | -                     |
| <b>Work</b>                                |                      |                     |                       |                       |
| 30th April - 6th May 2020                  | 85.42 ( 79.97,89.50) | -                   | 34.71 (52.42,23.58)   | -                     |
| 14th May - 21st May 2020                   | 16.68 (-12.12,40.87) | -                   | 27.00 (45.10,13.88)   | -                     |
| 28th May - 4th June 2020                   | 27.25 ( 1.12,49.73)  | -                   | 24.12 (42.00, 9.00)   | -                     |
| 11th June - 22nd June 2020                 | 35.81 ( 14.93,53.41) | -                   | 16.50 (28.50, 5.17)   | -                     |
| <b>Transport</b>                           |                      |                     |                       |                       |
| 30th April - 6th May 2020                  | 83.16 (76.87,88.39)  | -                   | 42.14 (50.85,36.86)   | -                     |
| 14th May - 21st May 2020                   | 70.82 (61.43,78.57)  | -                   | 31.75 (36.38,27.88)   | -                     |
| 28th May - 4th June 2020                   | 75.32 (65.63,84.26)  | -                   | 25.12 (31.12,19.63)   | -                     |
| 11th June - 22nd June 2020                 | 61.91 (49.49,72.63)  | -                   | 23.00 (27.00,19.67)   | -                     |
| <b>Others</b>                              |                      |                     |                       |                       |
| 30th April - 6th May 2020                  | 85.78 (83.87,87.57)  | -                   | 28.71 (49.35,16.14)   | -                     |
| 14th May - 21st May 2020                   | 65.22 (60.16,69.86)  | -                   | 17.06 (34.31, 3.94)   | -                     |
| 28th May - 4th June 2020                   | 62.69 (55.85,68.21)  | -                   | 11.44 (27.37, 0.32)   | -                     |
| 11th June - 22nd June 2020                 | 65.16 (59.78,69.25)  | -                   | 9.46 (17.50, 3.09)    | -                     |

4.3.b. Table 4.3b Effective reproduction number at the timing of COVIMOD survey Waves 1 to 4, estimated effective reproduction number based on the reduction of social contacts at the times of COVIMOD survey Waves 1 to 4 assuming values of the basic reproduction number of Norm (2.6, SD=0.54) and the reduction in mobility at the times of the COVIMOD survey Waves, with 10000 bootstrapped samples in various settings and in different time frames for the unweighted analysis without group contacts

|                            | COVIMOD                          |                                       | R (RKI)                          |                                       |
|----------------------------|----------------------------------|---------------------------------------|----------------------------------|---------------------------------------|
|                            | Mean reproduction number (95%CI) | Percent Mean Reduction Number (95%CI) | Mean reproduction number (95%CI) | Percent Mean Reduction Number (95%CI) |
| <b>Overall</b>             |                                  |                                       |                                  |                                       |
| 30th April - 6th May 2020  | 0.70 (0.42,0.99)                 | 74.00 (84.00,62.00)                   | 0.88 (0.82,0.94)                 | 67.00 (69.00,64.00)                   |
| 14th May - 21st May 2020   | 0.99 (0.58,1.41)                 | 62.00 (78.00,46.00)                   | 0.90 (0.81,0.99)                 | 66.00 (69.00,62.00)                   |
| 28th May - 4th June 2020   | 0.96 (0.56,1.36)                 | 64.00 (79.00,48.00)                   | 1.06 (0.94,1.19)                 | 60.00 (64.00,55.00)                   |
| 11th June - 22nd June 2020 | 1.00 (0.59,1.44)                 | 62.00 (78.00,45.00)                   | 0.84 (0.76,0.91)                 | 68.00 (71.00,65.00)                   |
| <b>Home</b>                |                                  |                                       |                                  |                                       |
| 30th April - 6th May 2020  | 1.60 (0.96,2.27)                 | 39.00 (64.00,13.00)                   | -                                | -                                     |
| 14th May - 21st May 2020   | 1.58 (0.93,2.26)                 | 40.00 (65.00,14.00)                   | -                                | -                                     |
| 28th May - 4th June 2020   | 1.56 (0.90,2.25)                 | 40.00 (66.00,14.00)                   | -                                | -                                     |
| 11th June - 22nd June 2020 | 1.41 (0.84,2.00)                 | 46.00 (68.00,24.00)                   | -                                | -                                     |
| <b>Educational</b>         |                                  |                                       |                                  |                                       |
| 30th April - 6th May 2020  | 0.07 (0.02,0.16)                 | 98.00 (100.00,94.00)                  | -                                | -                                     |
| 14th May - 21st May 2020   | 0.34 (0.12,0.78)                 | 87.00 ( 96.00,70.00)                  | -                                | -                                     |
| 28th May - 4th June 2020   | 0.42 (0.08,1.19)                 | 84.00 ( 97.00,55.00)                  | -                                | -                                     |
| 11th June - 22nd June 2020 | 1.10 (0.49,2.01)                 | 58.00 ( 82.00,23.00)                  | -                                | -                                     |
| <b>Work</b>                |                                  |                                       |                                  |                                       |
| 30th April - 6th May 2020  | 0.28 (0.15,0.43)                 | 90.00 (95.00,84.00)                   | -                                | -                                     |
| 14th May - 21st May 2020   | 0.96 (0.52,1.51)                 | 64.00 (80.00,42.00)                   | -                                | -                                     |
| 28th May - 4th June 2020   | 0.96 (0.48,1.62)                 | 64.00 (82.00,38.00)                   | -                                | -                                     |
| 11th June - 22nd June 2020 | 1.03 (0.54,1.72)                 | 61.00 (80.00,34.00)                   | -                                | -                                     |
| <b>Transport</b>           |                                  |                                       |                                  |                                       |

|                            | COVIMOD                          |                                       | R (RKI)                          |                                       |
|----------------------------|----------------------------------|---------------------------------------|----------------------------------|---------------------------------------|
|                            | Mean reproduction number (95%CI) | Percent Mean Reduction Number (95%CI) | Mean reproduction number (95%CI) | Percent Mean Reduction Number (95%CI) |
| 30th April - 6th May 2020  | 0.64 (0.31,1.14)                 | 76.00 (89.00,57.00)                   | -                                | -                                     |
| 14th May - 21st May 2020   | 0.91 (0.43,1.62)                 | 65.00 (84.00,38.00)                   | -                                | -                                     |
| 28th May - 4th June 2020   | 0.72 (0.33,1.32)                 | 73.00 (88.00,50.00)                   | -                                | -                                     |
| 11th June - 22nd June 2020 | 1.18 (0.54,2.33)                 | 55.00 (80.00,11.00)                   | -                                | -                                     |
| <b>Others</b>              |                                  |                                       |                                  |                                       |
| 30th April - 6th May 2020  | 0.40 (0.22,0.65)                 | 85.00 (92.00,75.00)                   | -                                | -                                     |
| 14th May - 21st May 2020   | 0.72 (0.42,1.04)                 | 73.00 (84.00,60.00)                   | -                                | -                                     |
| 28th May - 4th June 2020   | 0.91 (0.48,1.57)                 | 65.00 (82.00,40.00)                   | -                                | -                                     |
| 11th June - 22nd June 2020 | 0.76 (0.44,1.12)                 | 71.00 (84.00,57.00)                   | -                                | -                                     |

#### 4.4. Boxplots of the number of overall in various settings

Boxes represent the 25<sup>th</sup>, 50<sup>th</sup> and 75<sup>th</sup> percentiles, the whiskers represent the 10<sup>th</sup> and 90<sup>th</sup> percentile and the white dots represent the mean. Participants with no contacts are displayed as 0 on the log-scale of the y-axis.

4.4.a. Figure 4.4a Displayed are the number of social contacts by setting (a) the overall number of contacts, (b) home contacts, (c) educational contacts, (d) work contacts, (e) public transport contacts and (f) other contacts for the unweighted analysis without group contacts in overall contacts.

**Note:** *The displayed educational contacts are based on the group of participants who attended an educational facility (kindergarten, school, university) and work contacts are based on the group of participants who reported to work full-/part-time*

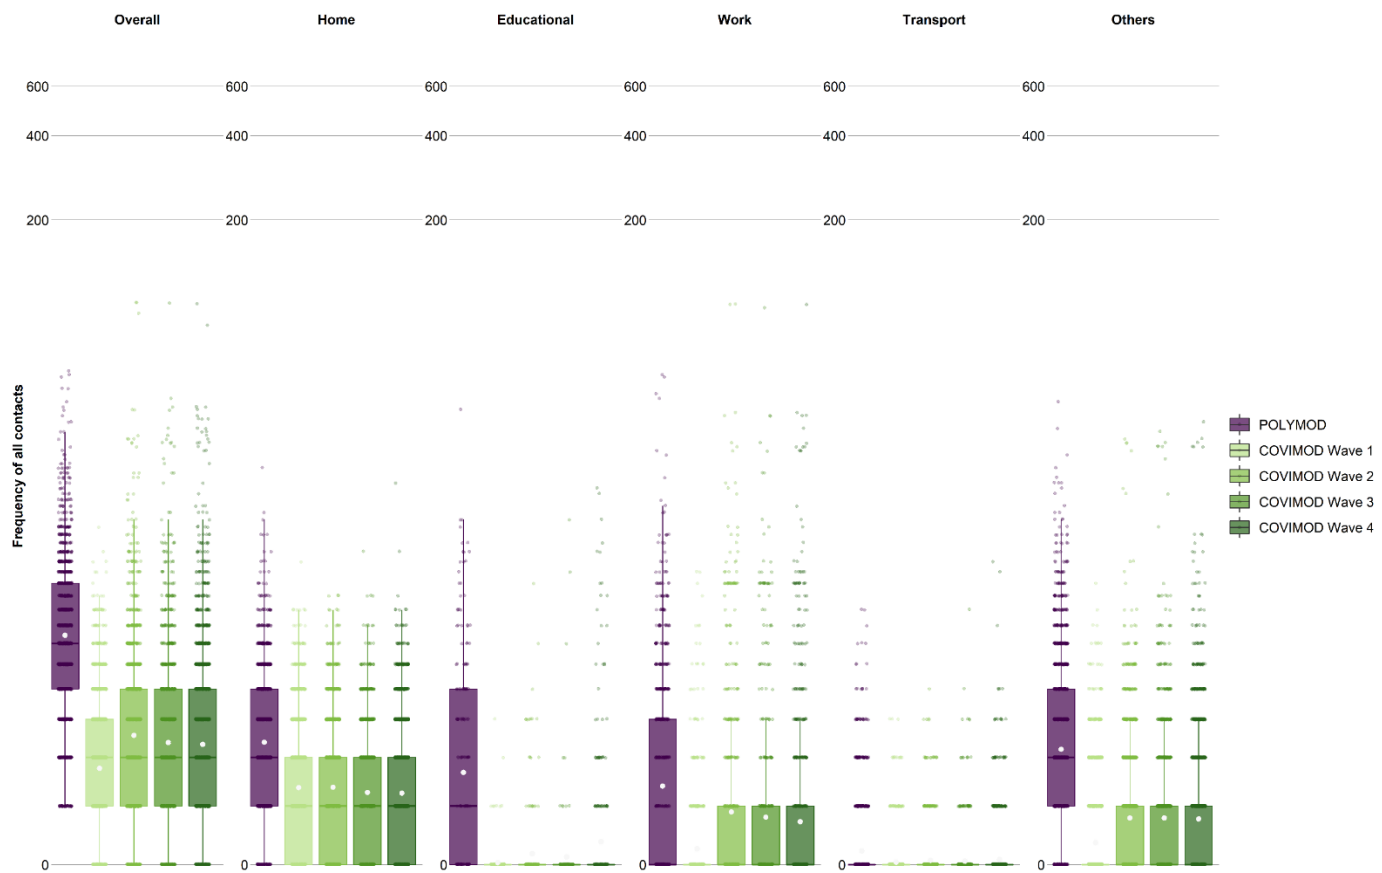

4.4.b. Figure 4.4b Displayed are the number of social contacts stratified by age group (a) 0 - 7 years, (b) 8 – 15 years, (c) 16 – 23 years, (d) 24 – 38 years, (e) 39 – 60 years and (f) 61 years or more for the unweighted analysis without group contacts in overall contacts.

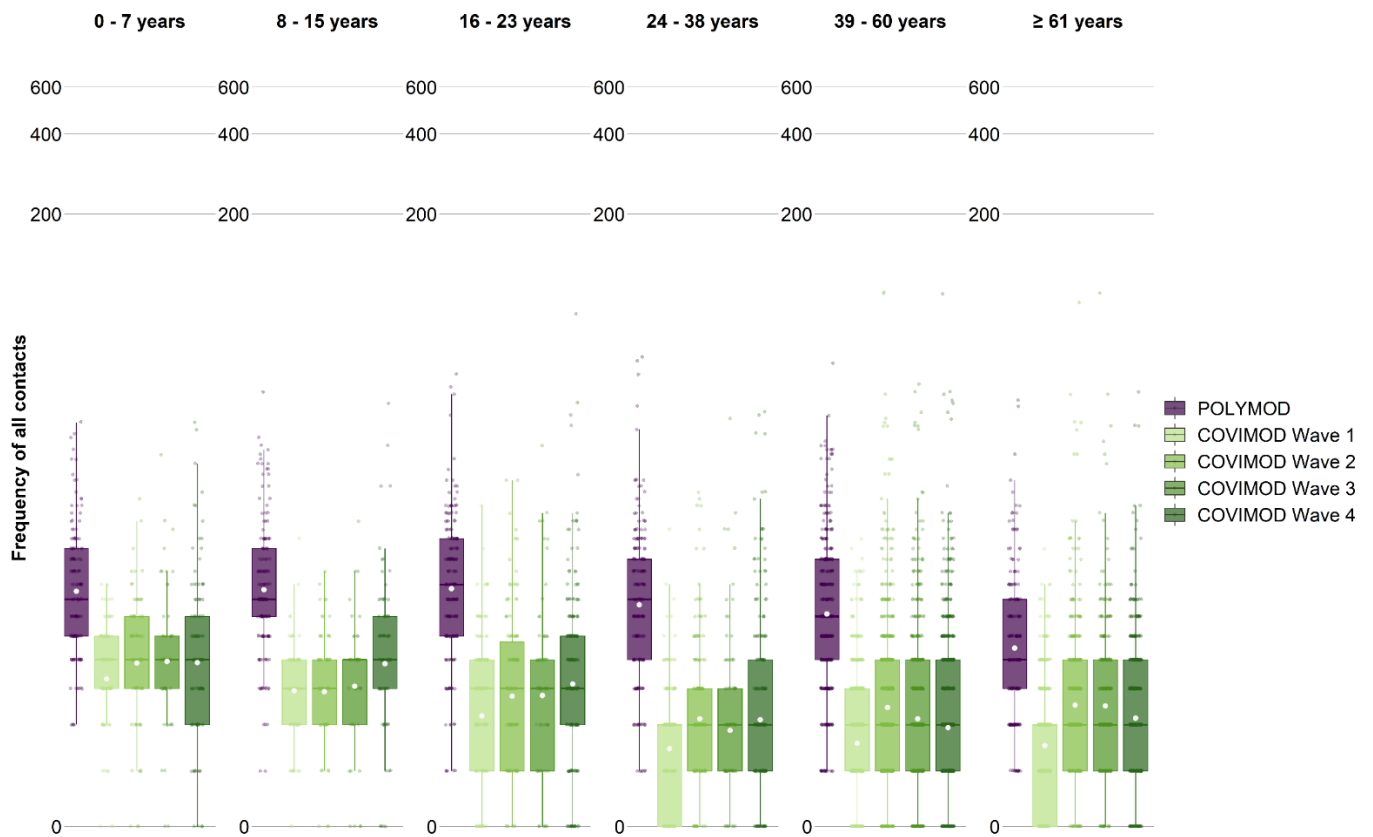

4.4.c. Figure 4.4c Displayed are the number of social contacts stratified by household size (a) Household size of 1, (b) Household size of 2, (c) Household size of 3 and (d) Household size of 4 or more for the unweighted analysis without group contacts in overall contacts.

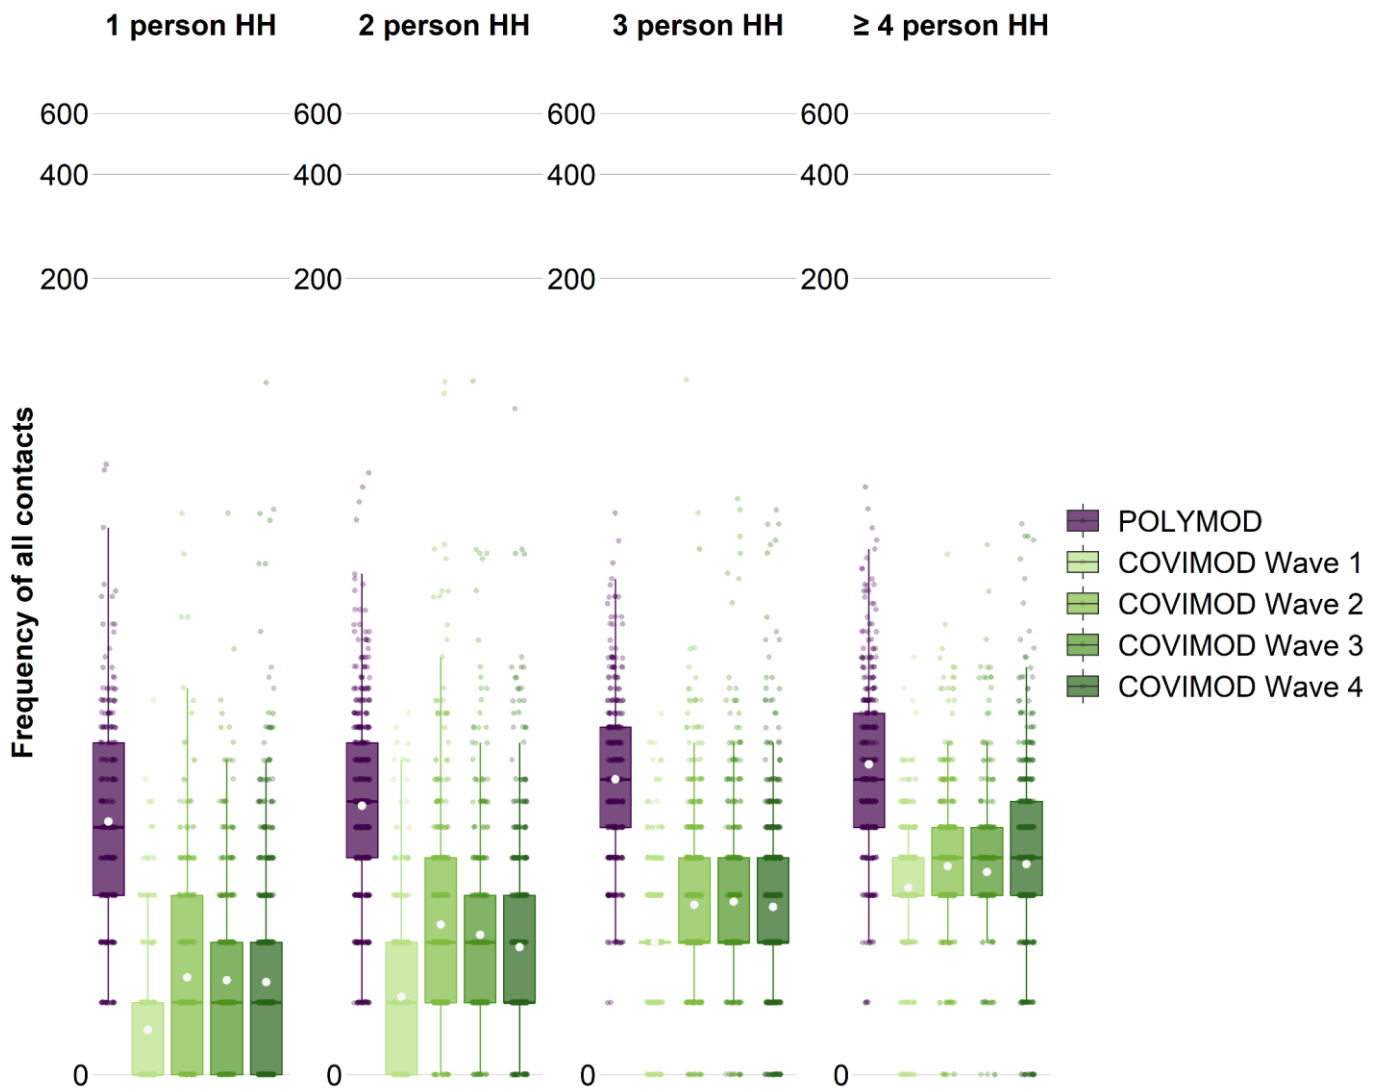

4.4.d. Figure 4.4d Displayed are the number of social contacts stratified by sex (a) Female and (b) Male for the unweighted analysis without group contacts in overall contacts.

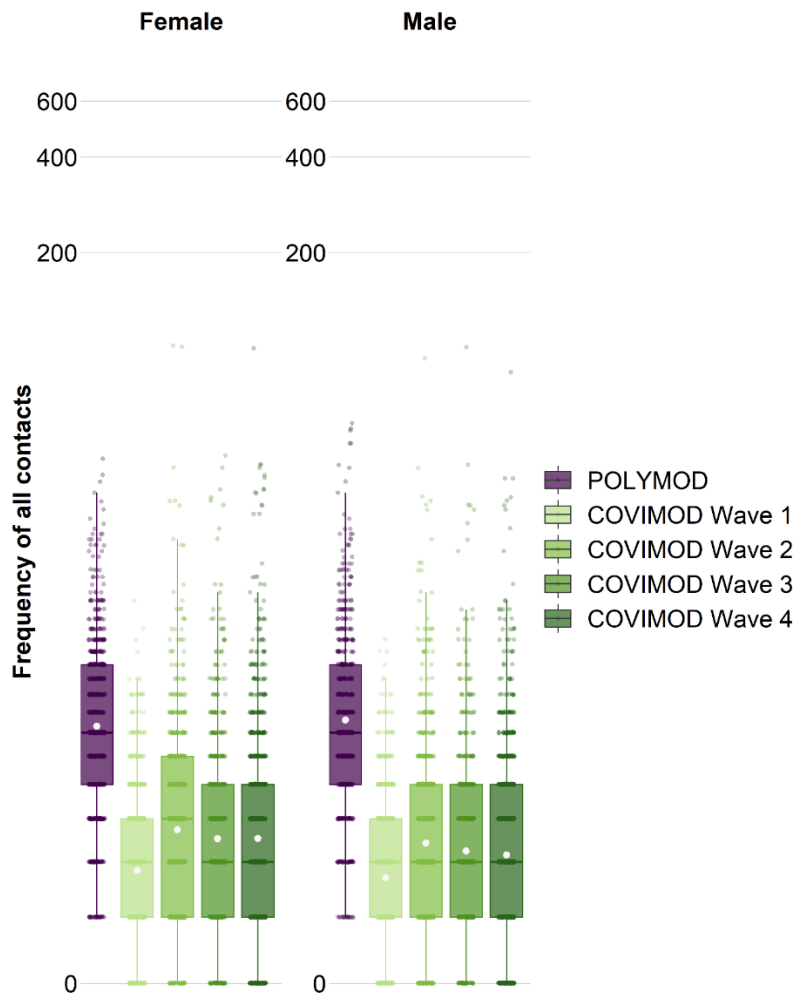

4.4.e. Figure 4.4e Displayed are the number of social contacts stratified by day of the week (a) Monday, (b) Tuesday, (c) Wednesday, (d) Thursday, (e) Friday, (f) Saturday and (g) Sunday for the unweighted analysis without group contacts in overall contacts.

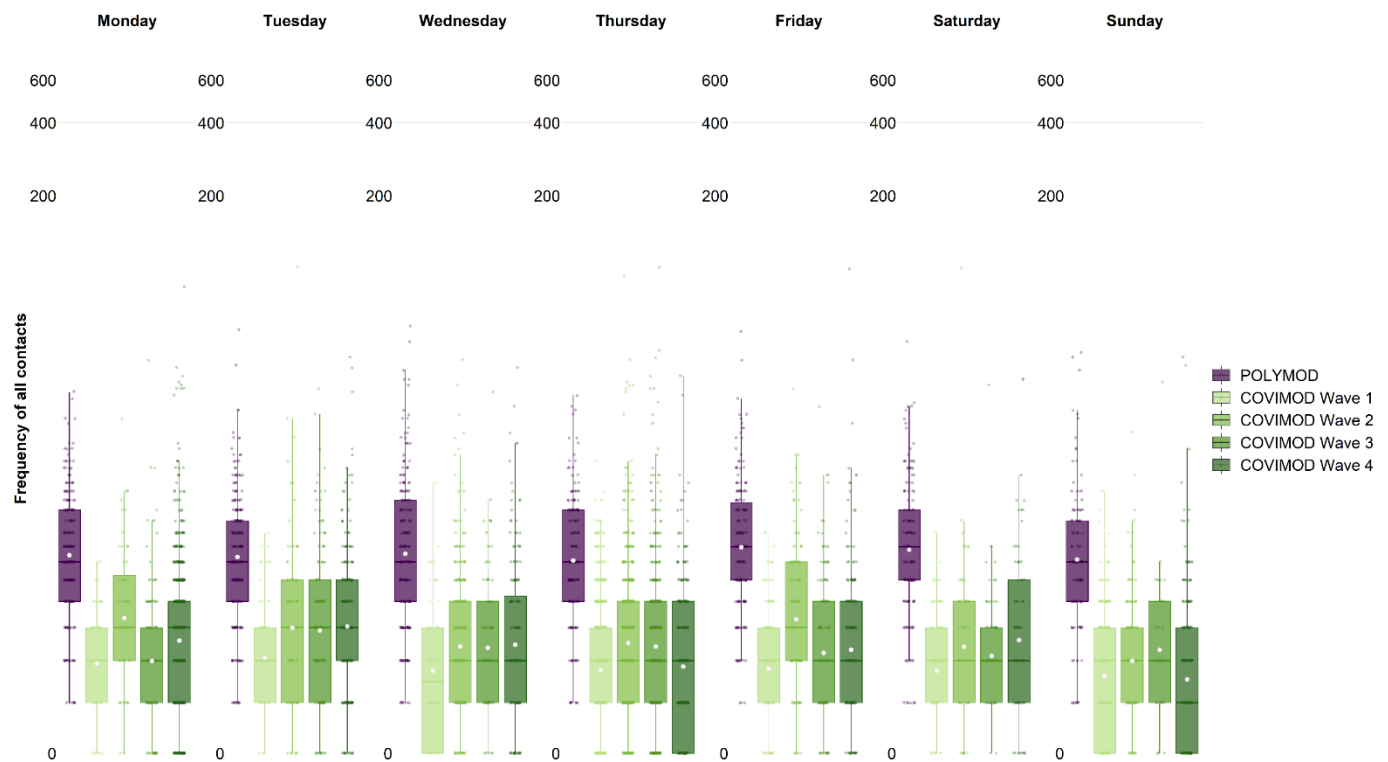



## 4.5. Social contact patterns

4.5. Figure 4.5. Social contact matrices with the mean total number of reported daily social contacts by participants in different age groups with individuals in other age groups in POLYMOD and COVIMOD survey waves 1 to 4 in various settings. Displayed are (a) the overall number of contacts, (b) home contacts, (c) educational contacts, (d) work contacts, (e) public transport contacts and (f) other contacts for the unweighted analysis without group contacts.

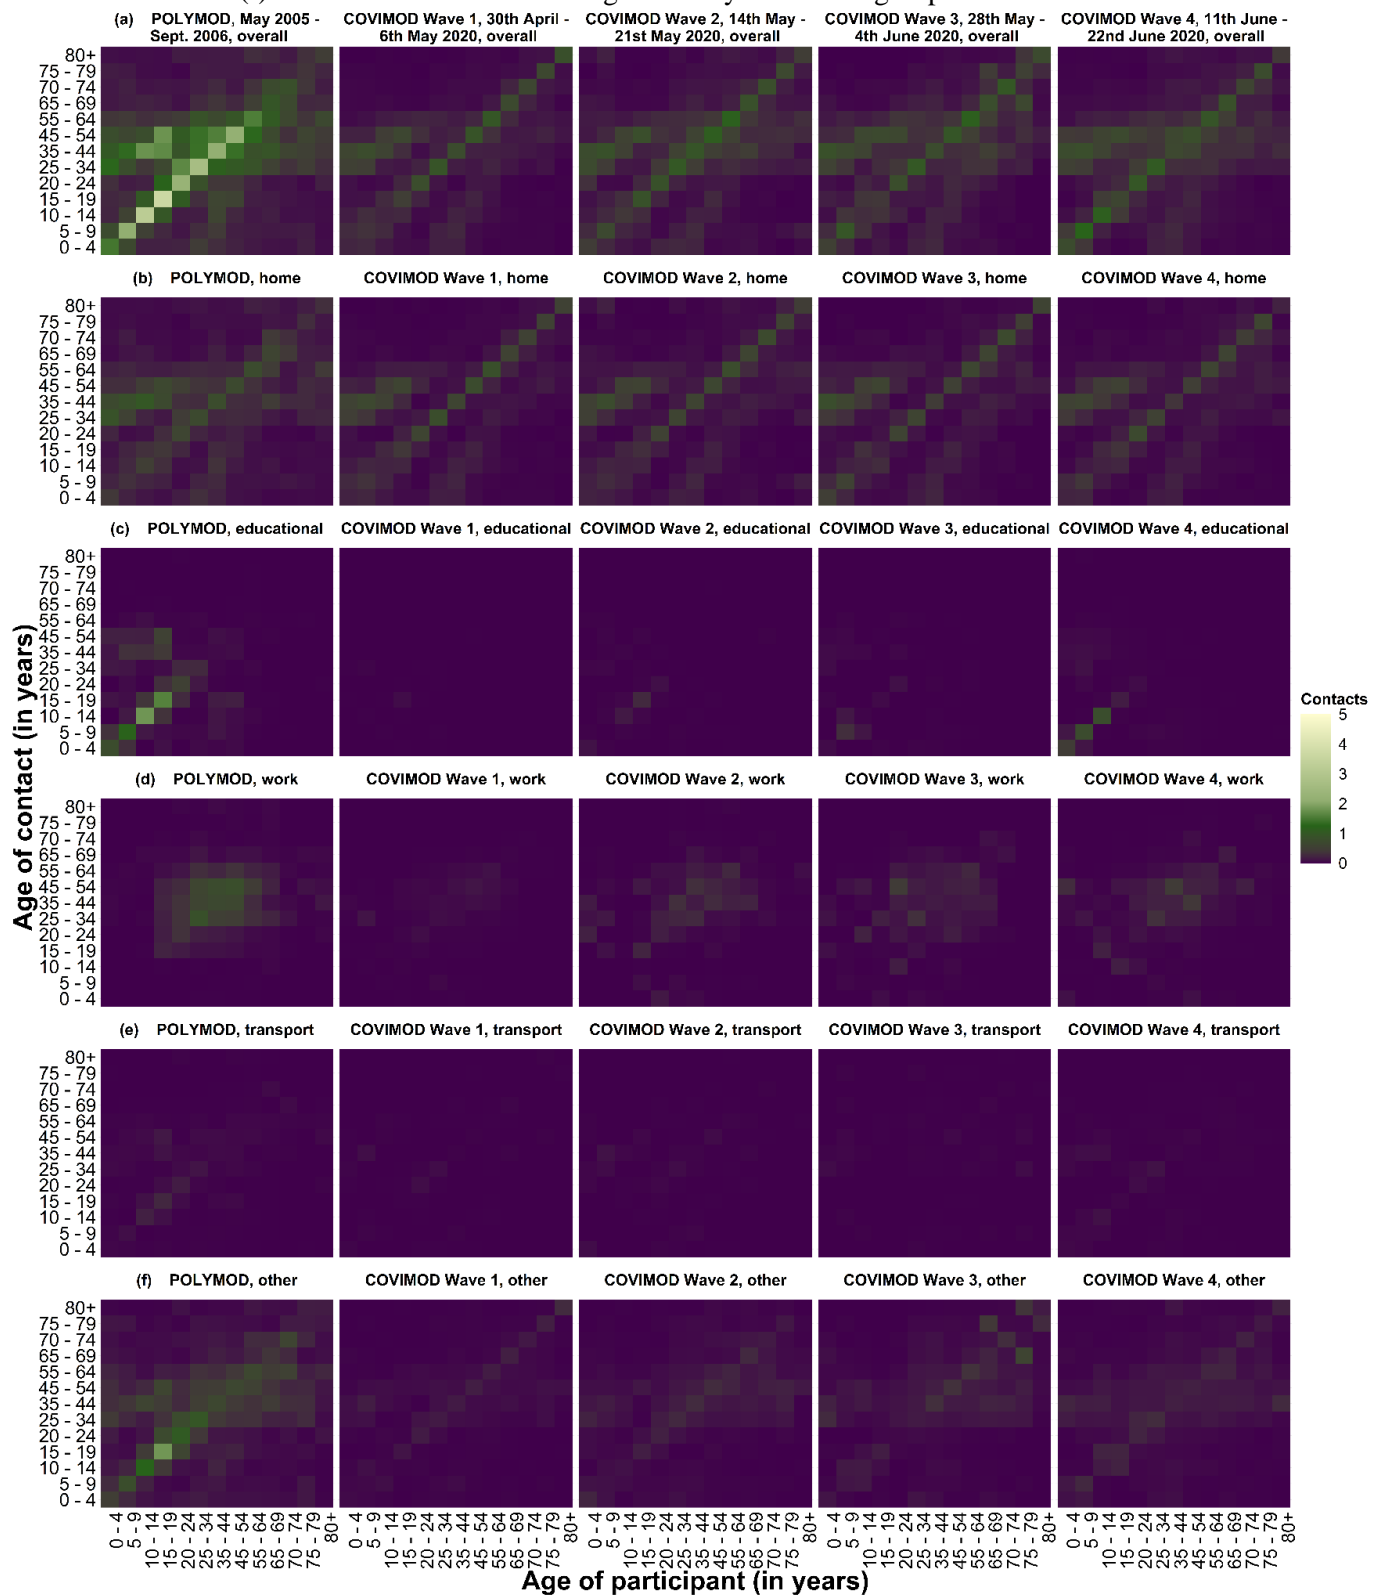

#### 4.6. Relative reductions in transmission dynamics of SARS-CoV-2

4.6.a. Figure 4.6a Comparison of the relative reduction in transmission dynamics based on different input data.

Displayed are the mean and bootstrapped 95% confidence interval of the relative reduction of the R estimates from the RKI compared to the basic reproduction number and the relative reduction in the number of social contacts (COVIMOD-simple approach) as well as of mobility estimates compared to pre-pandemic times (A) displays the overall relative reduction and (B) displays the relative reduction by setting for the unweighted analysis without group contacts.

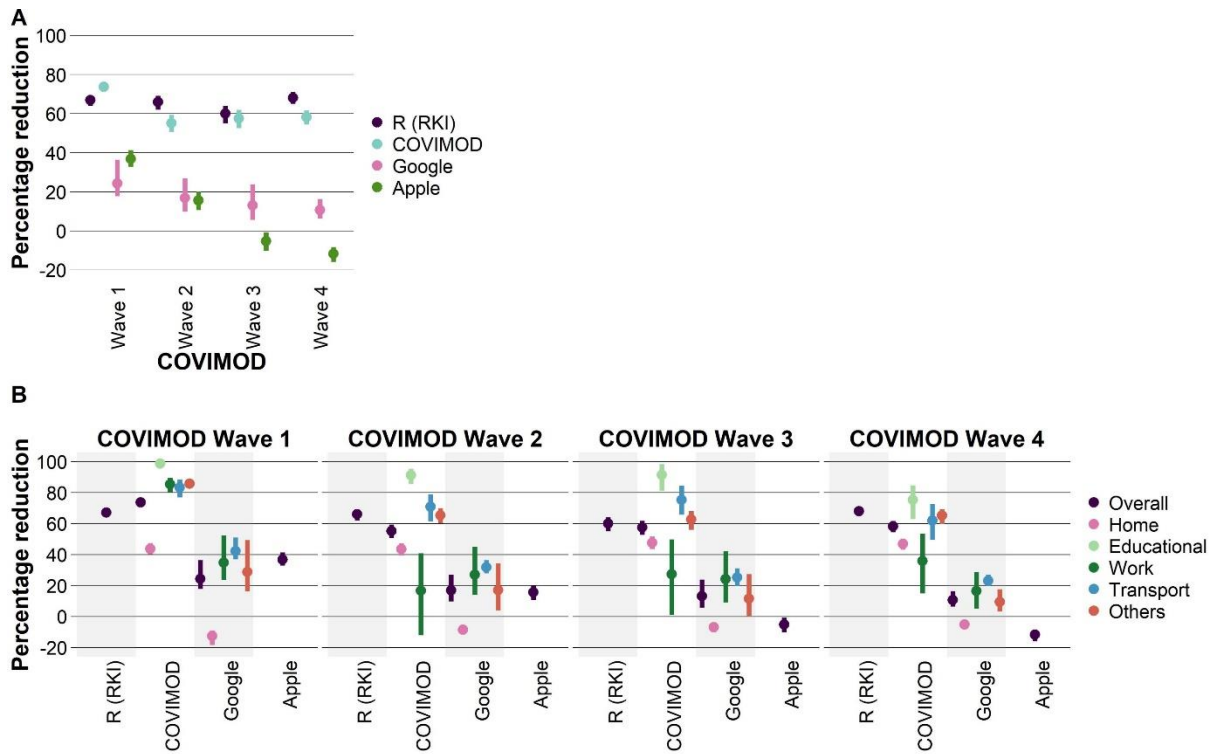

4.6.b. Figure 4.6b Comparison of the percentage reduction in transmission dynamics based on different input data.

Displayed are the mean and bootstrapped 95% confidence interval of the percentage reduction of the R estimates from the RKI and R estimates obtained from COVIMOD (complex approach) compared to the basic reproduction number and the percentage reduction of Google and Apple mobility data (A) displays the overall percentage reduction and (B) displays the percentage reduction by setting for the unweighted analysis without group contacts.

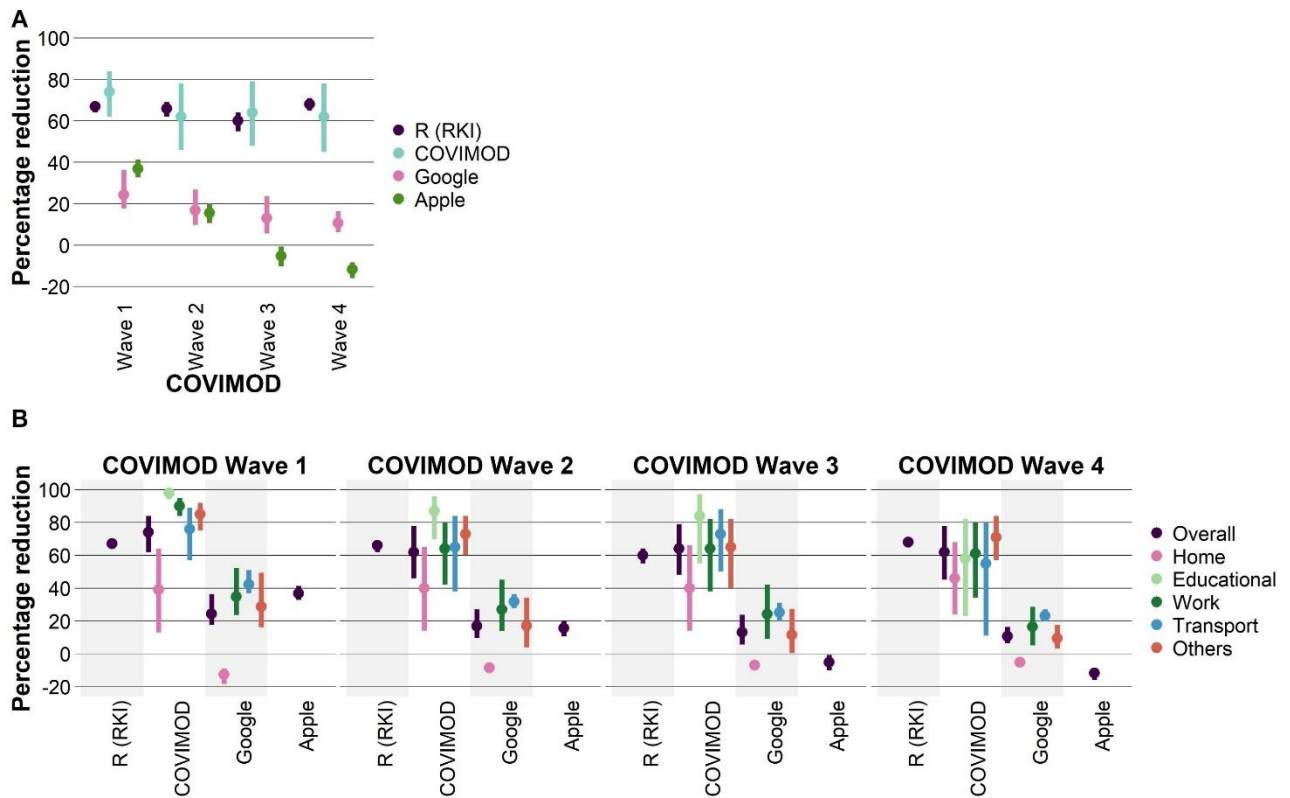

Supplement: MOESM3 [file 19758988]
