# Supplementary material for: Individual social contact data and population mobility data as early markers of SARS-CoV-2 transmission dynamics during the first wave in Germany—an analysis based on the COVIMOD study
Source: Springer Nature journal article supplement (doi:10.1186/s12916-021-02139-6), 2021-10-14
Supplement: MOESM2 [file 19758988]

# **Individual social contact data and population mobility data as early markers of SARS-CoV-2 transmission dynamics during the first wave in Germany – an analysis based on the COVIMOD study**

## **Additional File 2: How additional contacts were considered in COVIMOD**

Damilola Victoria Tomori <sup>1</sup>, Nicole Rübsamen <sup>1</sup>, Tom Berger <sup>1</sup>, Stefan Scholz <sup>2</sup>, Jasmin Walde <sup>1</sup>, Ian Wittenberg <sup>3</sup>, Berit Lange <sup>4,5</sup>, Alexander Kuhlmann<sup>6,7</sup>, Johannes Horn<sup>3</sup>, Rafael Mikolajczyk <sup>3</sup>, Veronika K Jaeger <sup>1\*</sup>, André Karch <sup>1\*</sup>

<sup>1</sup>Institute of Epidemiology and Social Medicine, University of Münster, Münster, Germany

<sup>2</sup>Immunization Unit, Robert Koch-Institute, Berlin, Germany

<sup>3</sup>Institute for Medical Epidemiology, Biostatistics and Informatics, University of Halle, Halle, Germany

<sup>4</sup>Department of Epidemiology, Helmholtz Centre for Infection Research, Braunschweig, Germany

<sup>5</sup>German Center for Infection Research, Hannover-Braunschweig site, Germany

<sup>6</sup>Center for Health Economics Research Hannover (CHERH), Leibniz Universität Hannover, Hanover, Germany

<sup>7</sup>Biomedical Research in End-Stage and Obstructive Lung Disease Hannover (BREATH), German Center for Lung Research (DZL), Hanover, Germany

### **Corresponding author**

Veronika K. Jaeger, PhD

Institute of Epidemiology and Social Medicine

University of Münster

Domagkstraße 3

48149 Münster

veronika.jaeger@ukmuenster.de

In some rare cases, participants did not enter one contact per line in the contact diary, but instead entered “5 colleagues” or “grandparents”. In this case, if the number of additional contacts is known (e.g. “3 colleagues”), we considered 3 contacts (in the same age group/contact setting/physical contact as the original contact) instead of 1 contact.

**Example**

Consider a hypothetical participant, J, who reported “3 colleagues” as one contact in the age group “30-40 years”. J had contact a non-skin-to-skin contact with them at work. In this case, we considered that participant J had 3 contacts, each contact aged “30-40 years”, met at work and non-physical.

If the number of additional contacts is unknown, e.g. the participant only stated “friends” or “grandparents”, we assumed the number of contacts provided in Table 1.

**Table 1.** Assumed number of additional contacts.

|                                  |            |
|----------------------------------|------------|
| Work colleagues/colleagues       | Assumed 10 |
| Friends                          | Assumed 5  |
| Patients                         | Assumed 20 |
| School class                     | Assumed 15 |
| Physician's assistants           | Assumed 3  |
| Residents of the nursing home    | Assumed 20 |
| Persons cared for at work        | Assumed 20 |
| Kindergarten                     | Assumed 15 |
| Clients                          | Assumed 30 |
| Grandchildren                    | Assumed 3  |
| Supermarket                      | Assumed 5  |
| Suppliers                        | Assumed 5  |
| Children                         | Assumed 3  |
| Persons from my rented apartment | Assumed 3  |
| Bank employee                    | Assume 2   |
